# Supplementary material for: Single molecule poly(A) tail-seq shows LARP4 opposes deadenylation throughout mRNA lifespan with most impact on short tails
Source: eLife. 2020 Aug 3;9:e59186. doi: 10.7554/eLife.59186 (PMC7413741; doi:10.7554/eLife.59186)
Supplement: Supplementary file 1. [file elife-59186-supp1.xlsx]

## Sheet: HEK293_Transfected_PAT_Stats
#gene	Samples	TotalCounts	Count_Es (1X)	Mean_Es	STE_Es	Count_WTs (3X)	Mean_WTs	STE_WTs	Count_CSs (11X)	Mean_CSs	STE_CSs
MT-ATP6	3	28064	11331	50.4652	0.135876	7985	50.6208	0.11863	8748	52.2178	0.153958
MT-CO1	3	22418	8995	50.5652	0.167528	6615	50.9788	0.149315	6808	51.8853	0.16593
MT-CO2	3	15215	6227	53.8934	0.200886	4599	54.232	0.203078	4389	56.4999	0.233136
MT-ND4	3	13165	5665	53.8911	0.244078	3634	53.437	0.204386	3866	54.8425	0.262708
MT-CYB	3	10959	4443	46.6223	0.214948	3050	46.681	0.160708	3466	48.1036	0.240967
MT-CO3	3	10283	4353	51.5095	0.22582	2991	51.3938	0.20183	2939	53.2116	0.27055
MT-ND1	3	6411	2727	48.5402	0.333793	1707	47.587	0.347799	1977	49.1082	0.37432
MT-ND2	3	6313	2700	48.6167	0.333227	1712	48.2266	0.348199	1901	49.9574	0.39327
MT-ND6	3	5070	2191	43.1209	0.31839	1366	42.3477	0.295921	1513	42.9326	0.336071
RPS13	3	4958	2262	79.863	0.883013	1431	92.4207	1.19131	1265	108.4	1.49409
RPSA	3	4522	1745	96.3049	0.913962	1522	97.41	0.992963	1255	109.053	1.33385
RPS18	3	4385	1611	97.5779	1.16416	1358	105.75	1.24395	1416	124.848	1.36616
RPL10	3	3468	1848	72.1813	0.870007	947	76.4055	1.22424	673	87.0163	1.74131
PTMA	3	2906	1382	82.9877	1.102	851	89.4606	1.37637	673	98.1545	1.83858
RPL4	3	2883	1297	84.8874	1.10961	833	89.1381	1.38823	753	103.697	1.74689
RPL8	3	2844	1480	79.2723	0.927495	782	85.3708	1.40303	582	98.1649	1.91453
GAPDH	3	2704	1297	76.4618	1.01772	836	83.0969	1.2978	571	96.0105	1.96382
NBEAL1	3	2643	730	76.0918	1.1022	1044	81.6628	1.09175	869	102.841	1.77534
RPL10A	3	2539	1278	74.6502	1.02977	731	77.8892	1.37261	530	99.4075	2.26383
H3F3A	3	2485	1168	82.7723	1.18356	769	88.3303	1.49488	548	96.2555	1.86826
YBX1	3	2384	1191	80.2242	0.918103	729	86.0014	1.26012	464	94.9634	1.92875
BTF3	3	2382	977	86.609	1.36187	740	91.8541	1.47887	665	105.284	1.93347
RPS9	3	2320	1188	79.6928	0.978412	657	90.6073	1.38955	475	101.968	2.20179
RPS15	3	2282	1135	80.0361	1.06403	671	87.5306	1.50753	476	99.5042	2.24226
TPI1	3	2270	1097	80.8924	1.12871	714	86.6835	1.36318	459	95.7124	2.29763
RPS17	3	2215	891	97.3154	1.45527	680	103.641	1.64083	644	118.115	1.97896
RPL7	3	2160	985	78.5147	1.14612	628	85.7245	1.72562	547	94.7989	1.99347
MT-RNR2	3	2107	636	42.566	0.441866	742	43.4892	0.479806	729	44.1536	0.604975
RPL11	3	2092	831	90.0638	1.42547	674	89.1543	1.56818	587	104.009	1.97964
RACK1	3	2078	973	73.8705	1.1689	603	84.5124	1.7115	502	99.3187	2.21761
RAN	3	1942	894	79.7953	1.32609	562	86.3897	1.61975	486	102.148	2.13864
EEF1A1	3	1937	957	87.9227	1.16515	525	93.381	1.62938	455	104.697	2.18103
EEF1G	3	1887	960	80.7583	1.19375	530	85.9528	1.63811	397	94.9169	2.19039
RPL3	3	1882	872	91.6101	1.4279	547	98.7075	1.78648	463	104.572	2.27361
NPM1	3	1830	836	78.3086	1.30711	556	81.696	1.56759	438	91.7443	2.08722
RPS28	3	1828	789	102.177	1.4877	570	104.791	1.74925	469	121.243	2.2426
RPLP0	3	1816	913	73.4272	1.05482	540	75.7148	1.34797	363	84.9725	2.20917
MT-ND5	3	1705	722	44.2964	0.707932	448	43.2366	0.592586	535	44.1495	0.670661
LDHB	3	1630	792	82.5215	1.39964	458	92.2707	1.97915	380	104.042	2.47778
RPS14	3	1622	841	69.3983	1.17169	476	76.9622	1.61109	305	85.9148	2.5828
RPS2	3	1578	758	80.5963	1.29773	461	80.9892	1.54951	359	95.7939	2.44885
NME2	3	1492	770	83.2273	1.21553	433	93.5797	1.80565	289	103.972	2.72788
RPS3A	3	1488	749	77.1642	1.2825	415	81.6843	1.80167	324	96.0833	2.60009
RPS10	3	1458	781	73.8169	1.33562	376	81.4255	2.19607	301	97.7508	3.07514
SSBP1	3	1400	617	74.9173	1.62739	366	77.6803	2.12364	417	95.1823	2.58276
HNRNPA2B1	3	1343	567	103.792	2.01036	424	104.007	2.40193	352	124.619	2.90065
PPIA	3	1299	658	84.9149	1.58174	361	92.4044	2.31916	280	95.4786	2.62778
HSP90AB1	3	1286	507	94.3452	1.94143	351	98.0199	2.39409	428	113.907	2.44114
ACTG1	3	1252	497	82.7203	1.57562	402	88.7139	1.84852	353	95.9207	2.25793
RPL12	3	1195	1159	78.2166	1.05195	14	54.2143	13.2573	22	75.7727	13.5474
SERBP1	3	1192	536	81.3694	1.75723	316	85.6076	2.42413	340	99.6	2.7104
ENO1	3	1191	585	78.4342	1.52661	363	86.573	2.02829	243	87.6626	2.55077
MORF4L2	3	1176	542	90.1661	1.90977	327	92.5963	2.14476	307	98.6254	2.68887
RPL31	3	1149	566	80.4859	1.64307	344	88.189	2.26539	239	110.36	3.67594
RPS6	3	1145	551	83.4211	1.68202	284	89.7535	2.2292	310	102.487	2.72517
RPS3	3	1098	529	74.2987	1.56535	315	74.819	1.84302	254	93.6732	3.03266
RPS27L	3	1064	527	82.4763	1.84703	316	86.8987	2.34579	221	103.778	3.58911
MT-ND3	3	1062	333	53.7117	1.00056	286	51.6783	0.500628	443	55.2935	0.994422
LARP4	3	1060	8	59	15.0062	112	133.17	5.58293	940	124.789	2.12193
H2AFZ	3	1017	451	88.6341	2.27403	289	92.7855	2.56961	277	115.534	3.38034
HSPE1	3	1016	411	89.7275	2.50145	295	95.0339	2.89039	310	114.523	3.34625
NACA	3	1002	461	82.5835	1.88358	281	87.9466	2.61217	260	102.2	2.87756
TPT1	3	990	467	75.5546	1.57939	283	84.1201	2.32295	240	99.8417	3.2456
RPL27	3	964	326	109.028	2.51076	312	112.846	2.47816	326	126.494	2.86673
RPL5	3	963	407	83.1818	1.98167	284	93.6268	2.54201	272	108.713	3.10188
RPL9	3	963	490	74.5714	1.59797	265	83.6226	2.34384	208	97.25	3.22585
RPL6	3	950	446	81.5067	2.02624	263	89.5247	2.80392	241	103.971	3.49386
RPL17	3	935	380	73.0763	1.70585	297	80.3064	2.27316	258	87.0891	2.84385
UBB	3	929	429	81.8765	1.99458	275	85.1745	2.3779	225	107.071	3.31028
RBM8A	3	900	366	85.071	2.28345	272	90.0074	2.6337	262	103.038	3.1561
HSD17B10	3	884	443	79.2551	1.75452	242	85.8967	2.47054	199	94.2915	3.18941
PSMB1	3	865	379	74.6121	1.88348	272	83.9926	2.28454	214	95.3925	3.00692
HSP90AA1	3	855	306	93.1275	2.76908	260	98.2769	2.94511	289	105.484	3.02209
PCNA	3	833	258	97.2946	3.27768	251	105.892	3.26948	324	112.852	2.90177
RPL36	3	825	341	87.8299	2.2588	258	95.8372	2.53311	226	113.212	3.48144
RPL26	3	823	373	81.8525	2.06204	237	96.9831	3.17418	213	110.981	3.83601
PA2G4	3	821	323	86.7492	2.40059	225	88.0533	3.03508	273	108.469	3.2466
TIMM13	3	820	366	85.3005	1.98119	247	89.1943	2.27497	207	95.8164	3.0496
NDUFA4	3	805	381	96.3333	2.08439	249	97.1285	2.51311	175	109.84	3.99796
HNRNPD	3	803	384	82.4193	2.23385	226	86.5575	2.96258	193	100.803	4.33857
RPS4X	3	798	404	74.8342	1.81168	218	78.6101	2.55316	176	90.5795	3.38405
RPL23A	3	780	329	75.079	2.28469	259	83.861	2.25081	192	99.6458	3.14745
PRDX1	3	763	380	84.9132	2.00994	213	92.2066	2.79005	170	101.853	3.5649
RPL29	3	762	391	78.11	1.82494	208	84.2548	2.67339	163	103.534	4.35503
SUB1	3	760	349	84.9226	2.25677	220	85.5227	2.76978	191	101.34	3.76735
SNRPE	3	754	346	82.6994	2.33632	236	95.9661	2.97618	172	104.767	3.58673
C1QBP	3	752	327	86.4587	2.30838	218	92.344	3.03697	207	106.304	3.48932
TUBA1B	3	744	335	81.8716	2.01617	230	86.3348	2.37782	179	105.994	3.38219
RPL32	3	739	335	79.2687	2.17377	231	87.6797	2.94004	173	103.029	4.06459
RPL35A	3	732	370	79.8676	2.01699	189	87.5661	2.84964	173	98.3815	3.43029
TCP1	3	723	291	88.1581	2.65409	189	85.9418	2.93948	243	112.42	3.24067
RPL27A	3	712	322	91.6615	2.29132	205	94.878	2.6201	185	111.6	3.2166
ACTB	3	708	239	104.485	2.78279	233	105.768	2.66955	236	127.737	3.75491
H3F3B	3	700	277	86.6462	2.55574	183	96.1257	2.88671	240	100.817	3.24785
RPL34	3	691	278	82.4245	2.43649	222	85.9369	2.83866	191	99.288	3.34589
RPL19	3	690	318	92.6478	2.39304	188	93.2074	2.62576	184	101.56	3.50108
MRFAP1	3	687	279	83.129	2.16347	213	92.9812	2.82655	195	100.185	3.47011
PAGR1	3	685	311	78.9196	2.03448	168	91.9702	2.85953	206	90.4223	2.9989
STMN1	3	672	323	88.8359	2.25997	179	90.4246	3.1555	170	111.653	4.06344
UBE2L3	3	670	257	76.3891	2.34744	179	84.5307	3.16259	234	101.427	3.54865
RPS19	3	659	266	82.2519	2.24691	228	91.9342	2.58097	165	108.848	3.99888
HSPA1B	3	657	217	106.415	3.02864	140	115.743	3.78324	300	110.06	2.43059
LDHA	3	653	298	80.2047	2.3285	194	73.7062	2.39468	161	90.3851	3.72442
HMGB1	3	644	315	74.8921	2.24867	174	73.5575	2.77828	155	79.6774	3.58541
BEX3	3	634	290	90.4552	2.8686	195	101.856	4.07833	149	119.678	4.46825
RPL14	3	626	258	83.0853	2.73319	168	92.7143	3.62206	200	110.1	4.00133
RPL39	3	611	245	101.176	2.83637	181	107.503	3.37657	185	119.616	3.72964
TBCA	3	611	227	100.877	2.97545	204	111.069	3.34857	180	119.522	4.32213
CACYBP	3	602	212	80.1651	2.65144	193	86.342	3.04132	197	103.03	3.38862
HNRNPAB	3	601	230	91.3696	3.42026	164	93.4085	3.34263	207	106.126	3.5448
HNRNPC	3	600	284	95.9577	2.57526	167	91.018	3.4804	149	104.456	3.96441
RPS27AP16	3	596	156	78.2179	2.499	226	86.3982	2.58433	214	104.393	3.00658
SNRPC	3	595	306	79.8889	2.46076	157	85	3.39406	132	102.273	4.05472
UQCRHL	3	594	269	89.8439	2.68928	187	96.2406	3.0786	138	118.536	4.81141
CCT7	3	586	242	77.4091	2.53187	150	86.0133	3.60275	194	96.6443	3.40827
RPL13	3	585	230	88.6957	2.53413	204	99.0539	3.15682	151	109.404	4.04808
RPS27A	3	580	430	80.5233	1.74679	81	83.963	3.6069	69	103.116	6.30681
RPS7	3	565	274	71.8759	2.27884	154	85.2987	3.42263	137	97.8686	4.27971
SNRPD3	3	564	247	87.1943	2.74881	178	93.7921	2.97577	139	100.309	4.3498
PPA1	3	563	242	78.2273	2.40453	157	86.3694	3.40116	164	102.335	3.82157
HNRNPA1	3	561	305	87.3213	2.43098	138	90.9493	3.73791	118	101.814	4.15062
SKP1	3	556	261	90.5939	2.61398	166	96.1205	3.34794	129	112.264	5.06623
RPL41	3	553	213	89.0845	3.07782	173	92.9191	3.29614	167	118.24	4.60935
DPY30	3	548	223	77.3094	2.77834	141	85.9645	3.55811	184	116.359	4.02378
RPL24	3	546	266	69.6729	1.96334	147	78.6939	3.24454	133	99.3158	5.45103
ATP6V1F	3	544	249	76.6707	2.69023	157	81.1529	3.12958	138	109.435	4.70663
NDUFB4	3	544	220	90.8455	2.9545	182	98.0385	3.40222	142	106.528	4.04979
RANBP1	3	544	232	92.7629	2.848	153	102.928	3.57382	159	105.704	3.93981
TUBB4B	3	541	217	86.4793	3.09151	153	82.7974	3.00084	171	97.4561	3.7469
MTRNR2L12	2	539	538	44.197	0.736053				1	50	0
CKB	3	528	249	95.7149	2.84906	159	105.031	3.7732	120	105.867	4.27934
PARK7	3	523	274	77.7226	2.29285	133	81.2932	3.7724	116	100.991	4.43806
ATP5F1	3	520	262	78.9351	2.20569	146	82.3288	3.47371	112	95.4375	4.33605
CBX3	3	520	247	85.6599	2.97598	150	87.4067	4.07686	123	94.8699	4.47302
EIF5A	3	520	268	91.0522	2.4783	131	95.9466	2.98049	121	101.397	3.81549
HMGB2	3	519	237	90.9536	3.09567	139	88.9137	3.54064	143	101.231	4.15238
SRSF3	3	516	244	85.8893	2.68532	139	87.5827	3.80228	133	101.955	4.58475
EEF1B2	3	515	239	79.6276	2.47067	149	82.2349	3.53882	127	100.441	5.14936
ATPIF1	3	502	197	103.178	3.87961	143	125.301	5.37866	162	150.728	5.42087
CALR	3	502	236	97.6992	2.87545	148	102.128	3.55687	118	111.364	5.24019
RPS12	3	500	260	82.1	2.12399	137	89.073	3.64624	103	100.359	4.54304
VIM	3	500	211	80.8578	2.73457	150	85.76	3.25262	139	97.6619	4.0742
HINT1	3	499	248	84.8387	2.46128	145	93.6207	3.67061	106	107.302	4.91052
TUBB	3	499	214	91.4766	3.00333	134	94.4478	3.67749	151	108.093	3.81254
HMGN1	3	497	240	86.4875	2.62128	131	87.7634	3.55682	126	107.183	4.68708
NDUFS5	3	496	229	87.5066	2.63567	154	95.4675	3.4872	113	120.982	5.54538
ATP5H	3	494	253	72.1265	2.22557	140	89.4286	3.61564	101	95.1386	4.97974
EIF3I	3	493	248	78.7621	2.36678	134	88.0896	3.87293	111	96.955	3.95532
RPS23	3	493	223	82.8924	2.78483	140	82.7071	3.28544	130	96.7231	4.20491
SAP18	3	491	228	75.6974	2.61401	134	86.4851	3.58802	129	108.45	4.88971
DDX39B	3	488	230	90.487	3.4444	125	90.256	4.58437	133	104.556	5.36882
NCL	3	486	200	106.16	3.41426	141	105.532	4.02053	145	111.986	4.44176
RPL13A	3	481	220	79.7909	2.69898	141	93.9574	4.01089	120	103.45	4.36275
MCTS1	3	480	219	81.6804	3.00936	122	82.8361	4.06535	139	94.9209	3.9122
POLR3K	3	479	217	87.6452	2.85818	129	82.6279	3.50898	133	92.812	3.9501
PSMA3	3	479	198	78.9444	3.1601	146	84.7055	3.62515	135	98.8296	3.80077
CCT5	3	477	190	85.8105	2.90415	140	86.45	3.59146	147	94.5646	3.94729
NAP1L1	3	476	191	83.801	3.00839	133	97.6692	4.07864	152	113.559	4.70895
PGAM1	3	476	206	84.6408	2.57274	131	90.229	3.62399	139	100.669	3.59773
HNRNPK	3	475	204	88.848	2.93379	135	90.4444	3.37259	136	105.904	4.45229
RPS24	3	468	227	77.63	2.45758	127	82.5197	3.71795	114	99.2456	5.00994
SENP3-EIF4A1	3	466	230	92.9652	2.76805	126	95.2302	3.48954	110	93.6909	4.09914
SRSF9	3	465	188	93.1489	3.07449	153	93.0131	3.26711	124	96.6048	3.85893
RPL35	3	464	199	86.3719	2.84018	144	98.0972	4.69938	121	115.281	4.57837
UQCRH	3	460	234	75.6368	2.35319	117	84.0684	3.54112	109	109.936	4.84423
PSME2	3	458	240	77.975	2.17482	137	88.5547	4.04261	81	95.1481	5.52502
CALM2	3	454	196	84.7296	3.01031	107	88.5981	4.20768	151	97.7483	4.18826
EEF2	3	452	198	82.3232	2.551	130	91.4769	3.61874	124	100.048	3.99116
AC016876.2	3	450	116	89.8362	3.76802	177	94.5763	3.08288	157	103.771	3.652
COX4I1	3	445	227	74.1454	2.44084	128	79.1953	3.50549	90	97.7	6.16278
MEA1	3	444	204	71.9265	2.46107	143	77.7552	3.12831	97	99.4433	5.21609
RPL15	3	438	180	85.6111	3.38586	126	93.627	4.00783	132	105.515	4.94936
RPL7A	3	438	231	79.8961	2.87366	129	91.4496	4.77485	78	111	6.1962
MINOS1	3	437	205	86.3854	3.07816	134	90.7687	3.78769	98	100.102	4.40569
TXN	3	437	199	88.2111	2.99066	134	99.2687	3.82024	104	107.856	5.04839
SERF2	3	429	224	102.112	2.92675	118	106.585	4.03025	87	119.115	4.78996
RPS8	3	428	193	76.7513	2.76483	123	95.4065	3.90799	112	103.25	4.88323
TPRKB	3	428	187	73.6845	2.76246	118	81.7458	4.02966	123	90.8211	4.33067
RHOA	3	419	197	83.066	2.76716	115	85.8609	3.45654	107	97.4579	4.7321
ETFB	3	418	214	73.8318	2.54261	111	80.5225	3.33873	93	94.3871	4.62181
ATP5G3	3	416	201	82.3035	3.20881	113	82.8496	3.63684	102	111.559	5.57752
YWHAZ	3	416	167	103.431	3.70781	122	102.23	4.06079	127	122.165	4.41307
EIF1	3	413	180	92.3889	3.38307	115	98.713	4.56832	118	101.398	4.64146
GNAS	3	411	195	92.3795	3.07946	130	97.5923	3.73776	86	107.523	5.46968
ST13	3	411	183	86.4262	3.07232	116	92.7155	3.75628	112	93.75	4.57909
CHCHD2	3	409	206	84.3107	2.66669	115	93.0261	3.71398	88	96.6932	4.8851
NUDC	3	407	173	85.5838	3.21603	117	92.2906	3.93642	117	98.6581	4.21013
SRSF7	3	405	180	91.5278	3.46329	109	88.6514	4.60504	116	100.457	5.1663
GH1	3	401	374	180.992	3.7393	5	182.4	23.366	22	193.636	12.9877
HLA-C	3	398	196	92.2755	2.81528	120	100.458	3.78397	82	124.695	7.17697
RPL21	3	392	136	89.8603	4.57874	122	107.549	5.2804	134	137.657	4.94852
SOD1	3	392	201	89.6169	3.21008	99	98.6263	4.48889	92	114.457	5.68237
HNRNPM	3	391	167	97.9281	3.62414	124	106.548	4.08646	100	117.85	5.6837
ALDOA	3	388	180	82.5222	2.53834	109	98.8899	4.42524	99	107.495	4.98274
UBE2D2	3	387	150	70.6267	2.98356	117	82.4701	3.87023	120	109.742	4.90764
TPM3	3	385	158	80.7089	2.90603	130	83.2308	3.48225	97	92.1134	4.13375
ARPC2	3	382	195	70.8821	2.86697	102	72.902	3.67268	85	90.8706	6.70575
HNRNPR	3	380	164	93.1463	3.22035	115	100.53	4.38051	101	98.604	4.85724
CYCS	3	379	181	85.232	3.0974	106	82.1792	3.72205	92	103.978	4.78528
PTGES3	3	379	177	86.3164	3.11907	83	92.1325	4.10576	119	102.689	4.48145
AK2	3	378	158	75.3165	3.0746	108	82.1296	3.70692	112	92.3125	4.24007
CCT3	3	377	162	81.2346	3.4464	103	85.932	4.29667	112	88.2054	4.81501
ATXN10	3	375	170	85.4882	3.16618	109	82.5229	3.8966	96	94.1042	4.73574
RPLP1	3	374	144	97.5833	3.24335	129	104.837	3.36091	101	114.782	4.68681
DNAJC8	3	365	177	88.4294	3.31104	101	90.3762	4.42962	87	81.8506	4.86212
YWHAQ	3	364	171	78.5965	2.80892	104	83.5	4.10184	89	88.6404	4.52945
FUS	3	363	167	103.503	4.15452	103	113.32	5.57421	93	122.667	6.74798
ATP5B	3	359	182	91.1538	3.32862	96	92.8229	4.80891	81	96.6543	4.74884
RPL30	3	359	142	85.0986	2.95872	116	102.672	3.88141	101	111.248	4.9872
HSPA5	3	355	145	98.2	3.45574	91	93.5714	4.08585	119	105.151	4.34626
SNRPG	3	354	147	93.381	3.93836	101	117.287	4.93191	106	125.123	5.84327
EIF4A1	3	351	213	91.2629	3.23435	71	108.239	5.54266	67	116.896	6.5276
OAZ1	3	349	150	83.72	3.96308	104	95.7596	4.48701	95	111.095	5.45856
PFDN2	3	347	127	96.874	3.98431	93	102.871	5.14732	127	112.386	4.42282
STRAP	3	343	133	89.1429	4.24906	97	90.9175	4.63415	113	96.0442	3.89323
GCSH	3	342	127	95.7953	4.52876	104	93.2788	4.25794	111	92.2162	4.50777
PDIA3	3	342	139	87.8777	3.70664	105	96.3429	3.89762	98	109.184	5.49691
RPL37A	3	341	120	114.325	4.32125	117	109.504	3.88478	104	126.135	5.50237
HSP90B1	3	338	166	112.602	4.91198	83	109.048	5.51123	89	126.753	6.83322
GSTO1	3	337	160	67.475	2.92377	95	79.4	3.33172	82	92.1951	5.16663
UBE2S	3	336	128	96.0156	3.99433	87	95.2874	4.38005	121	118.893	5.48263
TARDBP	3	334	147	95.8707	4.07421	92	107.685	5.59655	95	120.568	5.62893
SARNP	3	333	131	82.9389	3.73639	104	83.0192	3.77315	98	94.2551	5.27754
DNAJA1	3	332	98	78.9184	4.10137	105	89.6381	4.47248	129	105.977	4.46235
ECI1	3	330	194	74.9639	2.813	82	85.8293	4.93313	54	86.4444	6.48051
CCNB1	3	329	146	87.6164	4.1245	87	88.1724	4.29876	96	99.125	5.26173
HMGN2	3	328	143	95.1329	3.45718	104	90.3462	3.81874	81	101.914	5.14666
HIGD1A	3	327	155	78.3355	3.09695	87	93.5287	4.11433	85	90.0706	4.46088
EIF2S2	3	325	116	75.2069	4.05703	88	84.5455	4.28892	121	91.7686	4.17943
FTH1	3	323	190	85.2684	2.6524	79	88.7342	4.29036	54	106.556	6.38901
CFL1	3	322	146	98.9726	3.49314	102	109.618	4.94959	74	116.162	6.13127
PYURF	3	322	120	84.1083	3.85665	103	85.4369	4.30509	99	100.848	5.24071
RPL18	3	319	151	77.5099	3.17462	89	89.7303	4.5486	79	105.354	5.13447
BCAS2	3	318	127	79.7244	3.48665	87	87.7356	4.50239	104	98.6827	4.75532
GSTM3	3	317	172	75.1395	2.57843	89	86.8876	5.0117	56	105.375	6.25961
PABPC1	3	314	152	85.4342	4.08733	86	86.814	5.06674	76	87.9079	6.01102
FAM50A	3	312	162	96.0802	4.03266	89	96.2135	4.51348	61	87.3443	6.66997
PKM	3	311	146	94.5959	3.84601	85	88.3176	3.69731	80	93.1125	4.85441
MANF	3	309	130	83.4385	3.3825	97	88.6804	4.10564	82	100.598	5.4213
PRDX4	3	307	163	73.3926	2.92781	79	84.6329	4.74898	65	111.6	7.10685
PSMC5	3	307	123	83.6748	4.59075	79	93.3797	5.94991	105	117.038	6.32312
NME1	3	305	145	87.4207	3.28299	89	93.9888	4.46096	71	93.2254	5.5508
RPL23	3	304	127	77.5748	3.8454	103	86.4854	4.74911	74	100.622	6.72413
XRCC6	3	303	141	84.3191	3.08924	89	90.1124	4.46831	73	88.3014	4.09599
MRPL28	3	302	146	88.7603	3.41619	87	83.4483	4.27397	69	98.5797	6.80223
SNRPD1	3	298	110	88.8182	4.33397	87	89.7586	5.61209	101	119.881	5.61702
CLTA	3	297	125	84.368	4.39668	80	89.2625	4.98146	92	100.696	5.09022
PRDX2	3	296	155	95.9871	3.44493	84	100.095	4.9544	57	111.474	6.51263
PSMC2	3	296	110	88.8727	5.09615	81	88.4568	5.25801	105	98.3905	5.52439
CWC15	3	294	126	73.9048	3.44085	85	77.0588	4.35206	83	101.988	4.82676
NAA38	3	293	142	80.3028	3.94824	91	88.7143	3.92689	60	94.1833	7.29042
MDH2	3	291	134	80.5746	3.24692	93	96.5591	4.3949	64	99.8906	4.8371
HDDC2	3	289	122	69.8689	3.28953	93	79.3656	4.00187	74	103.081	6.34427
MRPL32	3	289	116	83.5862	3.90124	74	79.0811	4.90407	99	92.1212	4.98432
PSMB2	3	289	122	84.3852	3.7596	82	89.3415	4.69587	85	94.4706	5.07321
PSMD6	3	289	114	88.3158	3.59153	83	85.2169	3.88038	92	99.7717	4.88076
VDAC3	3	289	125	77.504	3.56842	80	83.95	3.86838	84	92.381	5.18788
SLC25A6	3	288	141	78.6596	3.25081	81	82.9877	4.45125	66	94.3333	5.33236
DDX17	3	287	120	129.717	6.66795	75	125.907	7.20331	92	139.087	8.21286
CCT4	3	286	106	86.3774	4.73309	65	86.3077	6.26333	115	93.0174	4.28723
GRSF1	3	285	110	85.4545	4.08516	65	85.0308	6.10228	110	92.3455	4.23854
LRRC75A-AS1	3	285	74	85.4324	3.47053	129	97.3333	3.21776	82	104.805	6.04306
MAT2B	3	285	106	92.4151	4.04935	77	99.3247	5.43154	102	106.588	4.40178
RPS27	3	284	89	112.18	5.10967	105	117.419	4.35905	90	137.067	5.41433
HSPA8	3	283	115	89.0348	4.08945	79	97.2405	4.77684	89	99.1685	4.7248
NHP2	3	282	129	77.3798	3.77157	88	79.2159	3.47877	65	95.3077	5.46862
PSMA4	3	282	127	87.0945	3.72616	84	93.3214	4.67792	71	107.831	5.6709
HNRNPDL	3	281	124	96.6452	5.09056	72	96.6528	6.44122	85	99	6.41941
PLK1	3	280	99	82.2929	4.0501	103	91.4563	4.45841	78	92.7949	5.14684
MRPL22	3	279	123	84.3008	4.2615	79	82.5823	4.76254	77	105.364	5.49469
PAIP2	3	279	102	74.0588	3.52815	76	82.8289	4.70605	101	95.8317	4.98157
PPP2CA	3	278	104	87.9038	4.04188	70	95.3	4.40715	104	97.625	4.971
ANAPC16	3	276	144	91.0972	3.95225	79	95.7975	4.89268	53	106.019	5.73054
SLC25A5	3	275	141	77.1844	3.09723	76	83.3026	4.07219	58	96.4483	6.1232
SRP14	3	274	139	88.9209	3.37242	81	89.4568	4.52061	54	109.037	6.66589
LSM4	3	273	133	85.0902	3.21116	90	91.9556	3.88155	50	96.48	7.11141
NDUFB10	3	272	118	91.9746	3.68952	88	88.5227	4.63739	66	111.318	6.27917
HSPB11	3	271	96	74.6875	3.52297	97	87.4433	4.17349	78	106.218	5.83559
SRI	3	271	115	76.5739	3.21099	75	88.8133	5.20371	81	96.6173	4.9162
PPP1R7	3	270	124	82.4274	3.9397	69	84.8406	6.6091	77	94.3377	6.1592
RBMX	3	269	117	86.8632	3.94359	80	86.1375	4.19977	72	109.292	7.3727
COMMD6	3	268	77	116.026	6.20475	92	109.978	4.8848	99	122.586	4.9552
NDUFS8	3	268	135	73.7259	3.37504	83	84.6867	4.53969	50	110.14	7.41485
RPS11	3	268	108	88.7778	3.98239	90	91.0667	4.48324	70	116.014	6.54555
BUD31	3	267	124	81.4919	3.92609	73	92.8082	5.34495	70	98.1	6.27727
HNRNPL	3	265	118	112.924	4.15047	73	118.164	5.5694	74	121.324	6.49105
ATP5L	3	263	93	118.882	5.30272	79	123.152	5.19407	91	127.264	5.52425
MATR3	3	263	131	104	4.43525	60	107.467	6.17547	72	114.139	5.8458
CETN2	3	262	93	85.0645	3.97875	104	97.7596	4.08753	65	113.492	5.36992
COX6C	3	262	113	113.381	4.34362	79	128.949	4.23477	70	143.257	5.58415
NASP	3	261	85	103.729	5.98775	85	100.212	4.49036	91	98.6264	4.77646
GABARAP	3	260	136	82.2794	3.46786	68	87.3676	4.88806	56	102.036	5.38202
HNRNPA1P48	3	260	73	90.4384	4.97549	94	88.3617	3.58423	93	106.828	5.20538
HSPD1	3	259	130	96.1692	4.7865	73	80	4.04163	56	107.179	6.91595
NT5C3B	3	259	129	79.9147	3.23089	66	88.5	4.19433	64	79.5938	5.64228
ANP32A	3	258	105	86.4	3.89088	82	87	4.26184	71	95.3099	5.08459
EIF4E	3	258	99	90.3636	4.67249	70	75.1429	4.76519	89	88.1236	5.03639
HNRNPA3	3	258	105	93.8095	4.2162	73	80.7945	5.5076	80	105.662	5.52025
SET	3	258	107	103.159	4.97932	57	108.018	6.13717	94	108.649	5.29609
TMEM258	3	258	108	107.583	4.79775	76	110.816	6.28258	74	112.797	6.0424
PDGFA	3	257	187	58.2995	2.35112	20	62.5	8.51455	50	74.3	5.11799
RPA2	3	256	92	85.1848	4.77083	72	93.7778	5.147	92	105.663	4.7897
NDUFA13	3	255	105	103.762	4.36042	89	110.629	4.7618	61	137.787	7.56511
KARS	3	252	95	84.0947	3.72174	69	81.087	5.01624	88	85.625	4.00949
RPF2	3	252	107	79.2243	4.79801	75	77.4667	3.84802	70	98.8571	4.90028
ARF1	3	251	95	85.3684	4.8188	74	81.6486	3.95959	82	96.5488	5.23658
PARP1	3	251	109	102.147	4.53393	77	103.286	5.01049	65	109.554	6.34171
NDUFB8	3	249	119	93.4286	3.98375	71	92.0282	4.7092	59	124.78	7.99203
COX16	3	248	123	81.6179	3.84812	73	90.8904	3.9534	52	94.1923	6.48268
HLA-A	3	248	120	84.3333	3.35285	75	94.6267	4.84933	53	111.132	7.16688
ODC1	3	246	102	82.8235	3.7664	66	90.1818	4.98731	78	112.487	6.20544
PSMA7	3	246	106	97.1792	5.3247	68	94.5	5.17791	72	117.764	6.4958
ATP5C1	3	245	102	74.049	4.15861	84	80.7619	4.65976	59	88.8644	6.75429
EIF3G	3	245	112	72.0625	3.94565	75	73.6267	4.53199	58	87.069	5.10624
MMADHC	3	245	99	76.7475	3.33132	60	88.9667	5.93544	86	108.151	5.54027
UQCRB	3	244	115	95.3043	4.27101	65	103.077	5.27153	64	115.875	7.28143
CSTB	3	242	101	88.4653	5.82864	74	87.3784	5.27099	67	104.388	5.84846
SDHD	3	242	130	78.6462	3.29044	48	75.3542	4.82691	64	82.8906	5.40644
LAMTOR5	3	241	109	87.1193	4.68067	71	96.4507	5.57539	61	112.475	7.14941
PAICS	3	241	111	81.1441	3.92085	65	94.7692	6.01945	65	95.4	6.20631
RPS25	3	241	102	86.5294	4.22909	70	97.3429	5.53165	69	114.348	7.34129
TYMS	3	241	108	89.0278	4.6095	69	96.4058	5.33055	64	104.031	5.93264
PSMB5	3	240	107	87.3364	3.86143	75	91.9867	5.15562	58	108.879	6.52445
EIF4G2	3	239	77	103.792	6.55126	48	124.875	8.93551	114	146.132	6.46136
EMD	3	239	85	72.3294	3.44866	79	86.4177	4.16341	75	91	5.2736
PPP4C	3	239	116	91.3621	3.76647	58	83.3793	5.75515	65	95.9385	6.59201
LTA4H	3	238	98	94.551	4.62708	75	99.28	5.04221	65	112.015	5.20184
MT-RNR1	3	237	62	45.7903	1.60452	95	41.8842	1.18362	80	47.0375	1.99886
SUPT16H	3	237	87	89.7816	4.40176	78	98.8462	4.95284	72	95.7778	5.45072
SEC11A	3	236	113	90.9292	4.75754	66	86.6061	4.82608	57	94.9298	7.00081
FAM136A	3	235	99	88.3737	3.97165	74	85.7703	4.08325	62	100.903	6.01012
PFDN4	3	235	83	83.3133	4.3822	74	85.9324	5.25467	78	105.333	6.15597
EIF3E	3	234	110	78.7273	4.18188	56	77.9821	5.04094	68	93.1618	4.91382
RBM17	3	234	82	83.4634	4.56134	72	93.6667	5.03111	80	92.7625	5.79222
HNRNPU	3	233	98	106.061	5.13886	65	107.662	5.36185	70	109.157	6.79086
NDUFAF2	3	233	112	79.5089	4.09916	74	85.7432	5.18669	47	94.9149	7.58467
LSM5	3	232	109	89.7431	4.24138	59	91.9492	5.11434	64	108.891	5.8506
MORF4L1	3	231	103	85.8447	4.34652	66	92.3636	5.57014	62	109.629	6.53639
FBL	3	230	106	68.1792	3.25787	65	73.8923	4.93403	59	94.8644	6.46385
UBC	3	230	91	91.7692	4.6979	67	107.985	5.90443	72	110.083	5.62549
ATF4	3	229	89	100.067	5.59586	56	111.375	7.46504	84	121.012	6.51623
CCT2	3	228	85	81.2353	4.6007	64	93.8281	5.74977	79	89.2785	5.67091
COPS4	3	228	95	85.6632	4.24017	66	85.1364	5.01851	67	95.5821	5.49611
IMPDH2	3	228	116	77	3.81629	66	86.4697	6.87098	46	93.9348	7.24741
TUBA1C	3	227	96	83.7396	3.83804	63	88.7619	4.87215	68	111.838	6.7194
ANXA5	3	225	96	84.5938	3.72278	89	95.9888	5.05597	40	118.625	8.44324
EWSR1	3	225	81	116.309	6.53796	55	115.109	7.96458	89	137.146	8.11372
YWHAE	3	225	91	82.4286	3.66104	51	95.451	5.21961	83	117.614	6.03906
COX6A1	3	224	122	89.7951	4.09096	53	105.472	5.8217	49	122.612	7.47111
DCUN1D5	3	224	70	88.9857	5.40716	65	87.3692	5.85811	89	117.281	5.74912
PCBP2	3	224	83	106.867	6.37653	57	115.456	6.86461	84	131.488	6.7862
PDAP1	3	224	98	77.5816	3.53064	70	81.7286	4.38262	56	88.5357	4.55178
SFPQ	3	223	98	95.9286	4.28594	56	100.339	5.62215	69	104.638	6.42498
PDCD2	3	221	106	99.7264	5.63675	47	90.5745	7.66694	68	113.265	6.93493
SIGMAR1	3	221	97	78.5979	4.01227	70	81.6143	3.88431	54	90.1296	7.98838
RPS5	3	220	95	77.6211	4.51114	62	82.5968	4.48134	63	109.302	6.86279
CCT6A	3	219	88	89.0114	5.415	55	98.3455	5.72466	76	109.763	5.56425
HPRT1	3	219	101	75.5644	3.94078	60	86.2833	4.14528	58	99.2069	6.50161
PFN1	3	219	101	98.5446	4.5726	50	112.54	6.29916	68	129.221	6.40612
ANP32B	3	216	91	90.5275	4.39364	58	93.1207	5.55066	67	111.313	6.58699
NDUFA8	3	215	86	78.7442	4.58355	66	76.8788	4.663	63	89.9206	6.16504
ELOC	3	214	95	85.1474	4.65948	60	93.1167	6.36069	59	101.898	6.83489
PDCD5	3	214	89	81.8876	5.23372	64	87.7344	5.50689	61	102.689	6.23307
RPS15A	3	214	93	82.3441	4.0581	60	84.4667	5.56869	61	106.508	5.57366
JTB	3	212	87	85.8506	4.34618	75	95.5867	5.50375	50	90.74	6.70801
SRP9	3	212	111	78.982	3.91375	63	79.7778	4.73093	38	97.9211	7.68956
VCP	3	212	92	90.25	4.49747	66	97.4848	5.58733	54	120.537	6.76774
NUDT1	3	211	91	91.9451	4.82237	64	92.7969	5.79526	56	121.75	7.10787
MRPS34	3	210	91	76.011	4.29743	58	78.4483	5.30055	61	93.9672	5.53326
PHB2	3	210	111	86.2793	4.48884	56	101.804	6.67276	43	91.9302	6.92292
NDUFA5	3	209	105	93.7143	4.91511	55	79.9091	5.03622	49	88.6531	7.26505
SSR4	3	209	105	81.8762	3.61209	57	98.6316	6.54974	47	108.128	7.1829
C11orf58	3	208	88	78.2614	3.62785	59	92.7288	5.6064	61	104.016	7.3471
SEC61B	3	207	99	76.9394	3.76359	62	83.7581	5.20089	46	94.0652	6.52771
NELFE	3	206	99	75.6768	3.64941	49	83.7755	6.56415	58	105.155	7.69177
DSTN	3	205	102	90.3627	4.06308	59	90.2881	5.75488	44	98.4318	8.44895
FDPS	3	205	99	89.4444	4.56611	55	88.8364	6.09646	51	95.902	6.87602
LYAR	3	202	74	96.6622	4.95643	57	101.474	7.00561	71	101.31	4.99798
PHGDH	3	202	110	85.6	3.81203	64	93.0781	4.85092	28	108.571	9.29003
BLOC1S2	3	201	87	92.2989	5.29984	63	88.9048	5.89835	51	105.824	7.73373
RPL22	3	201	106	93.1415	4.60709	54	102.741	5.07355	41	114.39	8.5227
TOMM22	3	200	85	76.0706	3.93518	54	87.1111	5.05794	61	99.8689	5.40981
RER1	3	199	85	75.2941	3.64986	68	87.9412	4.85806	46	105.935	8.63612
NAA20	3	198	76	81.3947	4.71703	60	86.1333	5.64296	62	94.7742	6.84876
C11orf98	3	197	90	79.6	3.76195	56	88.2321	5.52528	51	93.2549	6.53502
KHDRBS1	3	197	84	101.571	5.32903	53	103	6.76951	60	110.383	6.51089
TRMT112	3	197	81	87.6667	4.44146	53	93.2075	5.66857	63	115.175	5.93623
HSPA4	3	196	94	84.3191	4.61524	48	80.5833	6.26414	54	96.3889	5.15596
ILF2	3	196	91	84.3077	4.13604	47	109.979	6.80854	58	96.3793	6.58173
ITM2B	3	196	82	74.6585	3.37799	63	82.3333	4.25024	51	106.608	7.76778
PSMA2	3	195	79	90.9873	5.91229	61	89.2787	4.7378	55	105.236	5.90593
DMKN	3	194	99	80.4444	4.43806	47	96.766	6.74627	48	103.75	7.0178
SRSF2	3	194	80	99.9625	5.84611	44	94.2727	8.54681	70	102.443	6.74148
CD81	3	193	82	76.6829	4.84924	65	94.9231	6.03561	46	116.13	9.32128
TOMM7	3	193	74	106.838	4.64535	66	113.424	5.47999	53	117.113	6.5901
FTH1P10	3	190	51	83.9608	4.27514	81	90.1605	3.84946	58	103.966	7.55932
PIN4	3	190	87	84.2529	4.54874	51	91.1765	6.61849	52	112.423	7.68838
SNRPB	3	190	91	73.0989	3.71321	53	91.9434	5.23974	46	109.326	8.68244
TMEM14B	3	190	95	68.2	3.86812	61	70.1148	4.3742	34	82.9412	7.53848
FUCA2	3	189	84	99.631	5.1902	61	92.8361	4.98734	44	115.568	9.73037
NOP56	3	189	93	103.849	6.16683	37	101.297	8.56751	59	117.746	8.85773
CETN3	3	188	72	85.8056	4.9877	41	93.6585	7.83148	75	98.7067	5.39649
DUT	3	188	81	88.6667	4.98044	55	86.2	5.80894	52	118.442	8.27998
EIF4H	3	188	78	81.1538	4.76327	63	91.2063	5.71733	47	92.9574	7.07529
GMNN	3	188	66	85.8636	5.74208	57	89.8947	4.99176	65	102.831	5.99671
NONO	3	188	87	89.6897	4.658	58	93.3276	6.71137	43	107.93	7.29279
NAE1	3	187	77	88.8312	5.20494	55	88.2727	5.78716	55	99.6364	6.27783
SUMO2	3	187	73	73.6164	4.24501	57	84.4386	5.80392	57	106.228	6.96538
CCT8	3	186	84	93.5238	4.85199	56	86.0893	6.08367	46	106.304	8.67235
EIF3H	3	186	80	79.125	4.19782	49	100.082	6.21581	57	103.246	6.74891
HNRNPH1	3	186	94	118.202	5.11793	35	109.086	9.83599	57	116.789	8.03718
SARS	3	186	75	85.5867	4.92176	51	96.9412	6.047	60	118.7	7.56143
CHMP5	3	185	78	99.7564	5.67826	50	80.9	4.80052	57	104.316	9.07366
YWHAB	3	185	79	71.9747	4.9254	59	75.0508	4.74524	47	87.9362	7.90868
EIF3M	3	184	79	77.2658	4.7858	51	85.4706	6.01052	54	83.7037	6.84056
H2AFV	3	184	82	88.8049	4.78203	45	93.5333	7.2045	57	110.158	5.92582
EIF1AX	3	183	66	75.9242	4.57221	62	78.8065	5.23202	55	88.3091	5.34934
NFIA	3	183	37	63.0541	8.3216	46	62.913	6.1197	100	65.23	3.32442
SSRP1	3	183	86	87.1744	4.70021	55	106.927	6.34886	42	92.8095	7.16364
AKR1B1	3	182	82	103.366	4.92878	59	98.4746	5.52503	41	123.756	7.61271
RPL18A	3	182	91	87.8681	4.08892	46	77.1739	5.24668	45	101.489	9.3488
UBE2D3	3	182	79	85.2025	4.38082	38	103.553	8.87944	65	107.754	6.77248
NDUFA1	3	181	61	129.885	7.1323	54	121.278	7.61286	66	129.03	6.12721
NDUFAB1	3	181	73	89.9041	5.87542	50	91.98	7.4705	58	121.069	7.8689
SELENOK	3	181	85	85.5765	4.87296	47	78.6596	6.22247	49	95.4694	6.97052
VPS29	3	179	72	85.8472	6.39929	61	94.3279	6.23872	46	101.217	7.33649
CDK4	3	178	75	97.52	5.7761	55	106.327	5.99615	48	107.75	8.79016
DKC1	3	178	76	80.6184	4.51506	51	91.2941	5.21681	51	88.1961	4.95447
GPX4	3	178	88	85.9886	3.95681	51	103.588	6.45781	39	111.308	8.64754
HPF1	3	178	65	93.9385	5.99103	60	87.9833	7.09109	53	101.396	7.62779
MRPS25	3	178	66	78.2273	4.82731	54	100.648	6.41426	58	100.448	6.49957
PDIA6	3	177	86	81.0814	4.29	54	86.5	4.34035	37	98.0811	7.71274
MTRNR2L8	1	176	176	45.6875	1.70776
RPS20	3	176	78	83.1923	4.9734	42	94.119	7.13056	56	116.982	6.74983
SMARCB1	3	176	80	79.725	3.97842	48	78.4583	5.9005	48	98.1458	7.97729
AHSA1	3	175	60	80.45	4.76623	51	84.2941	5.445	64	88.6406	5.60911
MAF1	3	175	69	72.3478	3.95797	53	88.9057	5.57803	53	86.4717	6.32842
MRPS15	3	175	76	84.5658	4.81206	45	93.2	5.81421	54	108.278	7.91434
SLC25A3	3	175	71	83.4366	4.67817	50	96.7	6.6739	54	114.537	7.19757
SYNCRIP	3	175	78	87.3333	4.87546	38	78.9737	6.72115	59	105.186	7.24518
APEX1	3	174	80	93.65	4.99193	51	95.6667	6.19196	43	104.953	7.26944
MRPS21	3	174	79	81.9241	4.39759	46	90.1739	6.45746	49	109.714	7.18976
SUMO1	3	174	78	71.7179	4.72143	47	91	5.22322	49	101.551	6.74539
UCHL1	3	174	85	98.8235	5.98513	59	95.9831	5.4668	30	122.6	10.6859
COA6	3	173	60	79.0333	6.12536	48	89.625	6.86588	65	102.923	6.82773
HAT1	3	173	75	94.4933	5.62399	45	101.711	6.87049	53	101.736	6.33991
MZT1	3	173	75	75.4533	5.06468	53	85.0943	6.96133	45	108.556	8.12261
B2M	3	172	90	82.7444	3.97553	48	89.7292	6.23858	34	106.265	9.34714
RPS21	3	172	54	112.907	6.42319	53	108.396	5.40073	65	146.385	7.91962
JPT1	3	171	74	91.7432	4.61553	47	86.383	5.90245	50	94.2	6.56792
KDELR2	3	171	67	79.3134	5.19888	60	88.6167	6.05145	44	92.2273	7.3803
MT-ND4L	3	171	64	41.9844	3.62133	61	36.5246	3.29248	46	32.5435	4.13017
RPL36AL	3	171	58	89.9655	5.31532	45	95.5111	6.39295	68	123.824	6.63015
SNX5	3	171	55	88.8545	5.72213	39	81.1282	5.83458	77	108.26	6.45444
FKBP4	3	170	68	77.3382	4.32431	45	92.1556	6.94152	57	101.123	6.42982
STOML2	3	170	76	90.0921	4.94391	54	93.3148	6.25048	40	103.5	8.26657
HEBP2	3	169	89	66.4045	4.03969	42	75.2619	5.28358	38	89.2632	8.92921
LSM7	3	169	68	102.897	5.57953	62	88.3387	5.93877	39	104.974	7.70721
PPM1G	3	169	64	87.9219	5.48877	48	97.9375	5.93406	57	106.333	5.50773
PTP4A2	3	169	67	82	4.30586	42	83.6905	5.3475	60	106.167	5.83672
SF1	3	169	83	119.325	6.49019	41	129.537	10.1678	45	143.844	10.2755
UBE2C	3	169	53	98.2075	6.36978	65	100.831	5.56998	51	127	8.2331
GLO1	3	168	85	84.6235	4.39858	42	97	6.85847	41	92.1463	7.33052
SNRNP40	3	168	61	100.902	4.85964	52	98.2308	5.59014	55	112.145	6.19114
UBE2I	3	168	73	78.9452	5.10769	44	70.8182	4.80468	51	86.8235	5.80185
BIRC5	3	167	79	95.7595	4.36645	45	106.822	7.42603	43	119.698	8.3833
NUCKS1	3	167	83	93.6747	5.43648	44	103.659	6.62358	40	109.725	8.47098
POMP	3	167	81	68.1605	3.64277	41	84.3902	5.25063	45	112.178	8.2101
SBDS	3	167	64	93.0781	5.96627	51	89.0196	6.56172	52	91.8654	6.36338
TXN2	3	167	74	76.9595	4.4521	52	79.0192	5.57755	41	78.4146	7.84502
PAIP1	3	166	69	89.2464	5.27916	44	88.4545	5.33781	53	98.7358	7.84484
ROMO1	3	165	57	126.509	6.11378	51	129.059	5.43483	57	149.825	8.29482
NDUFV2	3	164	73	79.411	4.44232	37	97.1622	6.43147	54	103.5	6.7612
RSL1D1	3	164	59	84.9153	4.98537	59	82.0508	5.23218	46	90.0217	6.12245
TMEM70	3	164	66	97.5	5.74042	35	80.8857	7.88652	63	93.0159	5.49273
CANX	3	163	57	106.632	6.95253	46	97.913	6.96947	60	107.417	6.43585
COA4	3	163	80	82.6875	5.55323	51	84.9804	4.89831	32	90.1875	7.99138
EMC7	3	163	69	76.913	4.75639	47	87.9149	6.58062	47	99.2553	7.27021
C14orf2	3	162	79	87.9367	5.6107	47	85.0426	5.65709	36	115.25	8.38451
METAP2	3	162	69	84.6232	6.2652	46	87.8478	6.15175	47	96.7234	6.16916
PSMA1	3	162	65	85.2769	5.53883	41	99.3902	7.79411	56	100.214	7.46722
SSB	3	162	85	84.8353	5.46396	36	98.6389	10.9329	41	87.4634	7.0077
STUB1	3	162	82	74.2561	4.60284	35	80.8	6.49393	45	100.489	7.86645
CD63	3	161	79	76.9114	3.86066	45	83.6222	5.50226	37	97.3514	7.09131
ETFA	3	161	77	83.8312	4.62368	48	94.9583	6.64998	36	104.889	6.23842
PSMG1	3	161	60	69.7167	5.70663	52	79.5385	6.10524	49	83.9184	7.18986
BZW1	3	160	68	95.0882	5.78653	41	90.9512	8.5023	51	89.8431	5.98758
MPHOSPH6	3	160	70	83.5571	5.15109	43	83.6279	6.3343	47	93.7234	7.23803
YARS	3	160	84	84.3095	4.0624	39	93.9231	8.44539	37	96.8649	8.46064
NANS	3	159	85	78.4824	4.21957	46	77.2609	5.43134	28	94.0714	9.88053
OAT	3	159	70	91.6857	4.63547	50	94.6	6.12986	39	98.5128	9.21864
OSTC	3	159	71	81.8028	4.76338	51	88.1176	5.26672	37	106.676	9.19015
APLP2	3	158	60	100.733	8.25328	59	89.9492	5.71136	39	111.897	9.91733
COX6B1	3	158	72	85.8194	4.76105	46	98.4565	7.3964	40	101.875	6.13435
MLF2	3	158	61	93.0492	6.60765	43	117.628	10.7949	54	110.759	7.68458
ERP29	3	157	76	90.1447	4.10736	48	98.5	5.4887	33	116.121	8.19592
IDH3B	3	157	88	81.7955	5.22945	35	92.5429	8.69026	34	107.088	11.7892
ATP5A1	3	156	73	91.7397	5.65098	48	90.5625	5.60807	35	89.6571	7.02055
DENR	3	156	52	89.5962	6.10348	57	94.614	7.06361	47	109.362	6.16863
FAU	3	156	78	76.2949	4.00797	47	100.468	6.14285	31	105.29	9.10891
MRPL40	3	156	69	79.8261	5.64793	47	87.8298	5.92173	40	93.3	7.36412
MRPL9	3	156	54	80.8333	6.38267	51	80.8039	4.73269	51	90.7843	6.88776
SNHG5	3	156	57	93.6491	6.3734	57	96.9123	4.42302	42	103.357	8.0803
ADH5	3	155	72	91.7083	5.64909	56	96.8571	7.24456	27	93.037	7.05699
CSDE1	3	155	68	93.1471	4.84341	43	96.814	8.25652	44	99.1818	8.30185
EIF4A2	3	155	53	88.6792	8.20591	37	115.973	8.02111	65	107.077	6.88802
PSMD14	3	155	75	74.16	3.9381	33	90.5758	7.48234	47	110.234	8.85609
COPZ1	3	154	82	80.378	4.67408	44	81.0682	4.09626	28	119.214	9.46373
LTV1	3	154	51	84.8824	6.0589	41	104.39	7.03944	62	101.855	6.15562
QARS	3	154	80	77.175	3.73065	40	96.325	7.72507	34	87.0294	6.63605
MAT2A	3	153	58	110.121	8.51571	43	120.581	11.3694	52	121.942	7.48334
TMBIM6	3	153	75	82.8533	4.85024	43	84.186	4.55793	35	95	8.51419
APP	3	152	70	92.3429	6.36033	36	83.5556	7.05528	46	100.196	8.56922
BCAP31	3	152	54	76.8704	5.59762	48	81.9167	5.5921	50	95.62	6.80764
MYL6	3	152	79	94.1392	6.42723	40	101.575	7.68943	33	130.121	11.9744
RRP7A	3	152	75	80.7067	5.02943	39	90.4103	8.07149	38	94.5526	6.61796
TMA7	3	152	55	96.3273	6.4394	54	100.611	6.59719	43	106.302	6.96585
CHORDC1	3	151	49	96.3061	7.09319	48	88.7708	6.14136	54	105.093	8.08661
EDF1	3	150	62	84.5	4.84197	52	86.2308	4.65612	36	105.361	8.49202
GLOD4	3	150	54	102.407	7.28508	46	100.13	6.765	50	111.22	7.88499
OLA1	3	149	69	88.1884	5.14414	33	79.7576	5.71821	47	84.1702	6.35635
PEBP1	3	149	61	94.9672	5.3799	58	88.2586	4.97954	30	111.6	10.3187
PSMC3	3	149	71	82.4366	5.52686	38	104.316	7.74463	40	105.125	9.47505
RPL38	3	149	45	105.178	7.08072	46	121.587	6.7606	58	129.155	7.1787
RUVBL2	3	148	66	71.4848	4.05258	46	84.9348	6.25924	36	99.7778	7.81075
PSMD8	3	147	74	86.3649	4.94914	38	87.0789	6.38605	35	103.771	9.01265
SSU72	3	147	67	93.209	5.5016	44	92.4773	5.63998	36	112.944	8.96555
BEX4	3	146	58	78.4483	5.62715	36	83.1944	6.39792	52	85.3269	7.04349
C19orf53	3	146	64	83	4.33914	41	88.8537	6.40248	41	98.2439	7.97295
GABARAPL2	3	146	61	91.2295	5.86979	47	89.1064	5.57303	38	102.211	7.84477
POP7	3	146	52	86.8269	5.37793	38	100.237	7.83729	56	111.643	8.62311
GARS	3	145	60	78.8333	4.59965	45	88.8222	5.78711	40	81.4	6.37248
ATIC	3	144	57	85.9474	5.09584	41	103.537	6.27489	46	93.413	5.83821
C1orf43	3	144	62	71.3387	5.33932	36	82.1111	7.00405	46	86.7391	6.63093
MRPL15	3	144	61	75.1639	4.72781	40	90.675	7.26768	43	87.1628	5.05256
RWDD1	3	144	69	82.4638	5.0588	36	85.6944	6.76488	39	98.4872	7.66052
SCP2	3	144	61	90.6066	4.38789	56	87.7857	4.56296	27	104.593	8.84422
TAF12	3	144	62	81.4194	4.57926	39	110.282	7.76631	43	127.581	8.01157
CKS2	3	143	52	87.5577	6.149	41	91.8293	6.32219	50	107.44	6.95391
RAP1B	3	143	58	79.0862	5.37966	48	86.7708	6.13804	37	85.1081	7.25169
TMEM167A	3	143	62	79.1935	5.71814	49	80.6122	4.74759	32	81.6875	7.57004
EXOSC4	3	142	47	77.5957	5.61603	50	90.08	7.00759	45	102.822	9.67758
MRPL18	3	142	64	73.8438	4.2074	41	82.878	7.26749	37	101.135	9.87853
PPP1CC	3	142	56	90.5179	6.14379	33	78.7576	6.25859	53	100.132	6.81339
SRSF4	3	142	64	107.766	6.2014	27	113.222	11.2544	51	104.569	8.32515
GINS2	3	141	60	75.6333	4.93767	46	91.1957	6.40509	35	112.571	11.0211
GPN3	3	141	65	83.3538	5.53446	27	77.9259	7.45851	49	96.0408	6.62866
PGK1	3	141	60	94.6833	6.05762	48	107.958	8.54938	33	111.242	9.14138
PRPS1	3	141	56	88.125	6.02535	40	80.6	6.31534	45	93.3778	6.61381
SERP1	3	141	46	79.5	5.58038	36	79.8056	7.28104	59	111.864	7.0348
ZWINT	3	141	65	83.8154	5.3507	42	98.6667	7.16074	34	94.9118	7.83727
CNPY2	3	140	56	81.3036	5.76783	40	90.075	8.06702	44	99.9545	6.80362
MKKS	3	140	65	84.5231	4.3055	47	90.0213	7.6815	28	110.25	9.57777
ATP5J	3	139	58	90.8966	5.91591	46	98.7174	6.40288	35	115.429	7.56126
COPS3	3	139	56	76.1071	4.77642	39	89.6923	5.99201	44	97	6.21465
EIF5AL1	3	139	55	104.309	5.89404	56	109.661	6.17951	28	112.214	8.04664
ELP5	3	139	48	99.4167	7.7108	46	99.8913	7.53901	45	101.867	7.3976
RHEB	3	139	44	101.182	7.78941	39	93.2821	6.26334	56	110.286	7.41541
SRM	3	139	67	81.8507	4.80399	36	75.8889	5.14418	36	81.5	7.24659
BNIP3	3	138	65	80.0615	5.99329	33	87.4242	8.12133	40	86.75	6.11992
DCTN2	3	138	58	78.5862	5.50462	42	81.119	7.06073	38	97.7368	8.25584
GGH	3	138	67	73.7164	5.48746	33	80	7.80384	38	82.1053	7.03491
OAZ2	3	138	58	75.1034	5.311	48	79.7083	5.00433	32	103.969	10.2336
PHB	3	138	75	79.5733	4.36667	39	81.2821	7.0377	24	88.875	8.74947
TMSB10	3	138	71	105.958	4.23128	38	114.184	7.00582	29	114.724	7.52055
CALM1	3	137	52	95.3846	7.61646	46	94.087	5.92899	39	90.0513	6.55889
DDX5	3	137	62	107.452	8.06205	40	88.75	10.1983	35	107.743	10.0048
DYNLL1	3	137	64	86.3438	6.44725	41	80.2927	6.7166	32	117.844	10.8574
METTL5	3	137	62	71.2097	4.53826	44	83.7955	7.50527	31	110.452	9.21891
METTL9	3	137	58	83.0172	4.84047	38	75.8947	5.89189	41	98.0244	7.33976
NDUFC2	3	137	44	93.5909	6.96318	53	104.906	11.7053	40	124.55	8.76798
RBBP7	3	137	63	80.0317	4.34735	43	98.7674	8.18848	31	106.097	8.84322
SLC3A2	3	137	46	94.3696	8.40652	25	100.72	6.56257	66	98.6364	6.5696
XBP1	3	137	45	94.2889	7.2592	36	86.2778	5.92085	56	97.1429	7.74397
XRCC5	3	137	67	89.8507	5.27144	28	74.3929	5.99178	42	90.2381	7.06239
GHITM	3	136	50	87.76	5.29457	47	100.851	7.62534	39	105.231	9.5218
LSM3	3	136	59	76.4915	4.8946	42	99.8333	6.81825	35	100.286	9.00336
NSA2	3	136	74	73.4595	4.12276	27	79.2963	5.77037	35	96.1714	7.7516
TMEM147	3	136	70	68.4714	4.39093	36	62.3333	4.50531	30	90.6333	8.90811
UTP11	3	136	52	85.5962	6.47288	32	85.3125	8.88802	52	107.865	8.42799
ATP6V1E1	3	135	65	88	5.23805	34	94.7941	9.59471	36	98.5833	8.43863
CDC26	3	135	59	87.2034	5.8371	44	81.9318	5.70653	32	90.125	9.13952
FAM207A	3	135	47	88.9149	6.73832	43	94.5814	6.29363	45	98.3333	6.42388
NOL7	3	135	43	78.0465	5.55663	38	93.7105	6.7283	54	111.852	7.9441
PAM16	3	135	59	81.2034	5.87091	42	82.1429	6.03867	34	89.6471	7.9949
PRDX3	3	135	60	108.783	6.45433	33	91.9394	8.16867	42	132.976	9.4755
ATP5G2	3	134	69	84.3333	5.00727	33	78.4545	6.85372	32	104.156	7.94292
FTL	3	134	64	79.0469	4.71147	43	95.1395	5.79145	27	102.296	7.78762
GLUL	3	134	42	95.2619	8.70674	44	85.6591	5.5461	48	91.625	6.35609
IK	3	134	61	88.8852	6.3764	35	103.714	7.80472	38	88.6053	7.11681
SRSF1	3	134	48	80.2292	6.30939	36	73.0833	5.27739	50	99.5	9.03789
SURF4	3	134	45	84.8889	7.25379	40	83.15	5.22584	49	85.449	5.99264
ATP6V0C	3	133	65	82.1692	4.84923	35	87.4857	8.08903	33	121.061	7.54137
MRPS2	3	133	43	81.5814	6.51704	43	89.1395	5.35456	47	89.7021	5.70879
RAB11A	3	133	52	85.4808	5.72654	38	76.8684	5.57735	43	102.907	7.37241
RAB1A	3	133	55	83.3636	5.49863	35	79.9429	6.34131	43	101.791	7.46345
RAC1	3	133	57	81.0175	6.05517	40	93.525	7.0941	36	96.7778	8.07843
EIF3C	3	132	60	87.6167	4.99495	39	84.1795	5.25933	33	127.545	9.16726
SF3B2	3	132	54	97.4444	6.13562	44	90.7273	7.09793	34	101.912	7.89917
SNRPA1	3	132	57	84.8947	6.30768	34	91.6471	8.95344	41	94.3902	8.06384
UCHL5	3	132	47	84.7447	6.5852	42	77.6667	7.18304	43	89.6279	6.50124
COX8A	3	131	56	103.464	5.73651	45	104.067	4.94078	30	108.567	9.64016
EIF3B	3	131	56	86.5357	5.81266	37	97.3784	8.28028	38	117.921	8.89041
FKBP3	3	131	60	85.3833	5.86312	38	88.9737	6.9946	33	105.394	11.1593
SYNJ2BP-COX16	3	131	64	91.3281	5.37205	38	89.1842	6.6598	29	114.448	13.3356
UBA52	3	131	62	83.0968	5.12323	40	104.875	7.20366	29	118.724	10.3657
CENPU	3	130	53	75.8679	4.55488	39	93.1538	7.36193	38	93.9211	9.3833
DHFR	3	130	66	95.9394	5.80846	34	90.1471	6.4603	30	107.133	10.6908
EIF3L	3	130	54	81.2593	4.54411	29	83.3448	8.69845	47	104.872	7.87025
SMIM30	3	130	47	96.8723	7.26586	46	106.87	6.48348	37	98.5405	8.43448
SPCS2	3	130	67	88.4925	5.63011	36	95.7778	8.30152	27	88.2222	9.44602
ZCCHC17	3	130	63	75	4.32387	33	79.303	7.00446	34	92.7941	7.49553
GPR85	3	129	91	52.6154	2.82863	17	57.0588	7.62007	21	97.0476	10.901
HMGN3	3	129	53	85.3962	5.65826	38	97.0526	7.16688	38	91.2895	7.35185
PSMC6	3	129	48	80.3125	5.41355	32	98.625	8.83439	49	91.5918	7.11551
RUVBL1	3	129	59	84.5763	5.92528	36	95.1111	6.48024	34	97.9118	8.6485
HAUS1	3	128	55	81.0364	5.99272	30	82.9667	6.17387	43	93.9767	6.94578
PRDX6	3	128	46	83.8261	5.75363	44	96.0682	7.1182	38	95.5526	8.94162
ALG5	3	127	51	84.098	6.65572	35	87.2571	8.00942	41	91.2439	6.82751
CBWD1	3	127	70	78.8	4.59177	30	87.4	8.48562	27	110.778	12.688
IFT22	3	127	53	72.8113	4.46943	39	83.4615	5.86903	35	91.8857	7.85135
RTCB	3	127	50	81.88	4.97527	29	88.4828	8.27265	48	88.6458	6.11006
SCD	3	127	60	97.4333	4.63671	41	100.439	7.76568	26	113.846	11.1865
SEM1	3	127	48	86.8333	5.37309	37	92.2703	6.14622	42	122.714	7.01967
ACADM	3	126	53	96.4528	7.96108	28	100.893	9.19355	45	105.867	9.30825
DEGS1	3	126	53	97.4528	7.06838	40	94.55	8.55314	33	93.4545	10.1537
DRG1	3	126	59	66.9322	4.40423	27	86.5185	8.63485	40	89.05	7.12092
SNRPB2	3	126	59	92.5254	5.64559	28	92.2857	10.2183	39	95.7692	6.33955
TAGLN2	3	126	53	93.9057	5.17699	41	92.6585	5.20737	32	123.625	9.20202
ATP1A1	3	125	54	95.2037	5.45045	48	85.6042	4.65491	23	129.652	12.8695
HSBP1	3	125	57	94.4912	6.49834	40	96.875	7.5414	28	112.786	10.5038
MNAT1	3	125	59	92.0678	5.87947	38	84.9474	6.18672	28	105.179	9.81228
MRPL12	3	125	42	94.1667	5.59123	33	91.697	7.05097	50	104.44	8.06207
MRPS5	3	125	39	79.4872	6.62967	38	77.6053	6.36576	48	88.7292	6.62433
COX7A2	3	124	60	97.1833	6.57295	37	95	7.78932	27	115.667	12.9486
DCTN3	3	124	71	75.338	4.2963	36	89.4167	5.7016	17	60.2941	4.50664
EMC4	3	124	59	80.9492	6.65294	40	86.825	6.12136	25	107	12.4991
HDAC2	3	124	40	90.85	7.29148	39	104.128	6.57883	45	88.2444	6.5696
HM13	3	124	59	85.5593	5.67876	39	97.4872	8.60499	26	118.231	9.03434
MRPL37	3	124	48	70.7292	5.12879	45	86.3778	5.38102	31	105.226	10.1597
PSENEN	3	124	58	86.8793	5.83213	33	80.4545	6.68539	33	83.8485	7.26011
SPCS1	3	124	54	84.9259	5.30967	37	99.7027	7.5954	33	99.0606	9.01391
TMEM141	3	124	62	81.2742	4.256	41	85.6341	5.98668	21	101.476	15.0519
MTPN	3	123	56	94.0357	5.8506	27	86.0741	8.57052	40	109.55	9.49855
ZFAS1	3	123	37	100.486	7.68116	50	117.32	8.01905	36	131.417	7.65764
CSNK2B	3	122	63	87.6667	5.22644	36	98.25	4.95682	23	122.696	13.4059
DYNLT1	3	122	51	66.7843	4.89783	37	81.1081	6.2169	34	87.4706	7.04892
IKBIP	3	122	58	79.7586	5.12387	29	82.1034	7.12356	35	83.7143	7.67084
PQBP1	3	122	58	73.7931	5.34809	31	88.4194	9.02993	33	85.1515	8.76885
RANGAP1	3	122	57	91.7193	5.09955	32	106.281	10.3817	33	110.364	9.51774
RPS16	3	122	46	111.13	7.98437	38	107.158	7.61209	38	122.947	9.72588
CBR1	3	121	48	95.1042	5.91324	42	100.262	8.05269	31	113.161	6.61866
MRM2	3	121	32	89.6562	7.81258	55	107.091	5.92009	34	112.941	8.58128
NDUFAF4	3	121	42	96.9524	7.78145	41	101.561	6.63496	38	105.132	7.41771
SDHB	3	121	44	82.2273	7.258	32	109.5	9.21011	45	133.289	9.0971
SNX3	3	121	53	68.6981	5.46431	42	86.0238	6.55618	26	91.9615	6.83371
SSR1	3	121	54	84.1481	5.97436	29	104.241	9.42606	38	113.053	9.0631
UBE2Q1	3	121	41	88.2195	6.4807	38	87.4474	7.59042	42	104.048	9.52428
CCNB2	3	120	53	87.7736	5.76196	30	88.4	5.85218	37	113.73	7.77558
FLOT1	3	120	46	88.0435	7.91394	38	89.7105	7.37471	36	107.972	11.6764
MDH1	3	120	51	95.1961	6.76502	34	116.235	11.5135	35	96.9429	9.06997
PABPN1	3	120	54	73.8704	6.50462	38	70.2368	6.47352	28	101.714	11.4878
PPIH	3	120	49	76.4082	5.92286	33	78.2424	6.79991	38	96.5789	7.78633
PRELID1	3	120	62	74.629	4.5665	35	71.5143	4.93143	23	79.7826	8.60276
SF3A3	3	120	52	84.9808	5.47679	38	93.2632	6.30203	30	100.367	7.71888
UCHL3	3	120	49	77.3061	5.49993	35	86.1714	6.44126	36	105.444	10.6109
C20orf24	3	119	38	79	5.74384	37	84.1081	6.48815	44	95.6591	8.18219
CDKN2A	3	119	59	97.9831	5.79564	32	97.9688	7.66963	28	108.571	10.1199
ENSA	3	119	51	95.7255	6.6457	37	100.622	7.02977	31	91.9355	8.42509
HSPA9	3	119	52	91.3654	6.22168	31	99.1613	6.80027	36	119.083	10.1227
ITPA	3	119	67	86.1493	5.00573	30	87	6.04336	22	106.591	12.705
PNN	3	119	40	99.575	10.2244	25	84.92	9.62911	54	101.37	8.94409
CNBP	3	118	53	93.3774	4.90872	33	95.7273	6.78805	32	103.875	6.81691
RPN1	3	118	56	74.0714	4.86435	30	84.7	7.3645	32	84.5625	6.71081
SRSF5	3	118	56	108.143	9.16273	33	94.3333	10.4858	29	118.586	12.8256
TCEAL9	3	118	47	83.8936	6.54436	31	77.3548	8.12334	40	100.7	8.12875
TSPAN3	3	118	54	88	5.50446	35	113.314	9.34078	29	116.586	13.0046
YWHAH	3	118	46	99.9783	7.56756	29	100.138	8.89718	43	105	8.44887
ARF3	3	117	56	94.6964	5.39622	26	94.9231	9.67641	35	98.9143	7.84288
CHTOP	3	117	50	90.14	6.26399	25	104.96	10.8525	42	125.262	9.14317
COPS6	3	117	58	80.6379	5.3354	34	79.8529	6.80298	25	89.6	7.69415
MRPL3	3	117	45	80.6889	6.50058	28	76.4286	7.55362	44	89.2045	6.81224
MRPL51	3	117	54	88.9259	6.06372	33	101.303	8.31657	30	112.367	10.2896
MRPS26	3	117	42	91.0476	5.83338	38	83.9737	6.0802	37	107.162	7.66658
MRPS31	3	117	40	75.3	6.62563	37	89.7838	7.51333	40	98.675	8.57084
PRMT1	3	117	53	93	6.57866	35	91.8	5.84421	29	108.034	10.3369
PSMA5	3	117	53	69.7358	5.58989	40	74.85	4.47305	24	79.625	9.72893
RRM1	3	117	40	82.875	6.92578	37	92.4054	8.63212	40	92.125	8.77889
AKT1S1	3	116	52	85.8269	4.95219	42	83.8333	5.50169	22	104.409	11.787
BCCIP	3	116	56	89.6071	6.8173	30	85.6667	5.40644	30	108.8	10.5797
GNL3	3	116	54	103.315	6.67617	23	100.783	15.8484	39	91.0513	8.48086
NME4	3	116	48	83.7292	6.24269	45	104.267	7.2759	23	99.6957	11.2183
NSMCE4A	3	116	47	90.1064	6.88516	23	95.5217	10.2759	46	118.152	9.05898
PDCD10	3	116	43	84.907	7.42256	28	74.3571	7.15538	45	89.5556	6.70003
RRM2	3	116	49	92.0408	6.19682	33	88.2121	8.81519	34	98.1471	7.32514
TMUB1	3	116	42	79.3571	5.82228	39	96.3846	7.855	35	92.4571	8.47299
UQCRFS1	3	116	48	91.9167	6.91283	30	94.3333	9.12059	38	98.0263	7.10258
UQCRQ	3	116	44	109.955	7.68229	39	119.974	7.70763	33	135.848	12.9735
VDAC2	3	116	48	95.9375	6.78709	35	83.6571	7.12546	33	108.182	9.83654
DDX39A	3	115	58	89	6.06911	26	101.923	10.1496	31	80.1935	6.29262
GPI	3	115	50	100.64	7.09015	40	109.15	6.80042	25	115.36	8.90139
MTHFD2	3	115	47	95.6809	6.90714	29	80.0345	5.78971	39	90.5897	6.67502
POLR2L	3	115	49	102.122	7.40991	31	121.903	7.20711	35	144.886	11.3241
PRMT5	3	115	53	81.8302	6.30724	24	97.5	7.10022	38	94.5526	6.90474
PSMC4	3	115	48	85.25	5.04713	31	89	7.00691	36	94.7222	7.44627
PYGL	3	115	39	101.128	6.96381	42	110.905	9.30266	34	129.471	9.55554
RRP15	3	115	47	84.1915	7.11515	28	86	6.47562	40	98.2	8.78722
SF3B6	3	115	57	89.4386	5.49311	36	98.2778	7.31011	22	112.682	10.7312
SHMT2	3	115	56	93.8929	6.77036	37	108.757	8.80155	22	105.818	10.3656
TARS	3	115	41	93.0488	7.51615	27	81.5185	8.23729	47	97.4255	8.84153
AAMP	3	114	55	81.4545	4.53824	30	90.2	8.2647	29	129.31	11.1821
ATP5G1	3	114	55	75.5636	4.24387	38	71.5263	5.78992	21	100.667	13.8617
DHRS7	3	114	61	72.2787	5.40701	22	66.7273	8.49482	31	96.3871	9.46758
ENY2	3	114	59	91.2712	5.42579	33	96.8182	7.71133	22	100.818	10.3492
PTTG1	3	114	60	67.1833	4.58091	28	87.1429	10.3845	26	104.885	11.0097
PUF60	3	114	43	92.4651	6.9894	33	104.545	9.58688	38	120.053	6.55775
RPS26	3	114	57	87.4211	5.01619	29	87.5517	5.98603	28	113.5	11.6418
TIMP1	3	114	50	81.92	5.57601	26	96.7308	7.77257	38	118.289	11.1865
TSFM	3	114	45	102.867	6.34985	27	110.963	9.28803	42	113.095	8.1183
COX7C	3	113	40	93.15	6.39351	48	109.917	5.71599	25	133.36	8.16096
CUTA	3	113	51	92.9412	7.10321	31	85.0323	7.44043	31	101.903	9.05152
GTF2A2	3	113	42	80	6.00038	39	83.8205	7.74697	32	97.375	9.90963
ISY1	3	113	51	79.1176	5.84732	31	79.3226	5.78588	31	100.226	9.15319
MRPL19	3	113	40	79.4	6.25098	38	87.2895	8.85079	35	86.6286	6.58521
RPL36A	3	113	37	104.378	8.89295	35	122.371	9.68239	41	140.024	8.31099
SNRPD2	3	113	48	83.7917	5.11788	42	81.7857	5.78582	23	89.5652	8.3301
CHCHD1	3	112	44	93.6818	7.19603	32	95.2188	7.78555	36	115.611	9.6587
EID1	3	112	54	80.5741	4.67625	32	70.9062	6.87235	26	87.8077	9.73738
PDHB	3	112	45	79.8	5.71406	26	84.5	7.38447	41	97.0244	6.54463
RBM39	3	112	44	100.636	9.77252	30	84.1333	7.65967	38	95.7105	8.19566
SEPT2	3	112	54	99.4259	6.69042	33	99.0606	10.0985	25	102.36	16.1747
TUBG1	3	112	50	76.82	6.45289	41	100	6.5283	21	94.3333	9.96691
DNAJC7	3	111	39	74.2821	6.11515	35	75.7143	5.84641	37	96	8.67109
FDFT1	3	111	49	90.6735	6.01812	31	85.8065	8.44008	31	108.419	9.39056
MAZ	3	111	62	84.129	4.84738	23	80.913	8.77958	26	96.7692	12.3697
NPC2	3	111	56	87.1964	5.09091	33	95.7879	5.92108	22	92.8182	9.35252
RBM3	3	111	60	77.85	4.58856	35	100.943	7.91557	16	113.062	10.9182
ERH	3	110	43	105.488	6.80568	26	109.231	11.8053	41	101.122	6.67903
NUDCD2	3	110	52	78.3077	5.4896	29	83.6207	6.51905	29	91.8966	7.93633
CALM3	3	109	47	90.9787	5.50784	31	104.774	6.87932	31	121.871	10.1856
CISD1	3	109	35	73.7429	7.57163	34	73.1176	6.75636	40	89.925	8.19103
ECHS1	3	109	50	98.4	4.86802	28	99.7857	6.44549	31	92.4839	8.33593
ERGIC3	3	109	53	67.3962	5.04979	31	71.129	7.64519	25	83.84	7.87476
HNRNPH3	3	109	49	82.2857	6.23549	22	92.1364	8.84165	38	99.0789	8.76971
MCM7	3	109	50	96.36	5.14282	29	92.9655	7.02204	30	94.3333	7.95646
MTCH1	3	109	46	87.6739	4.81717	42	95.119	5.57999	21	108.571	10.3224
PABPC4	3	109	48	95.5208	6.89612	28	100.821	7.4765	33	109.212	10.9657
PRPF31	3	109	46	81.8696	6.22344	33	88.5152	5.53445	30	101.467	6.60938
SCNM1	3	109	43	78.0233	5.34697	24	84.2083	8.4049	42	104.357	8.4091
TMEM50A	3	109	43	69.7907	4.6824	40	74.325	6.94122	26	90.3846	10.5829
TPM4	3	109	40	79.275	7.19218	24	80.4167	8.87723	45	91.3333	8.18357
TUFM	3	109	48	105.438	8.12633	27	83.8889	7.35133	34	118.765	10.0426
UBE2T	3	109	32	92.7812	7.26719	30	114.3	8.94553	47	107.191	6.87518
ATP6V1G1	3	108	43	93.6279	8.41115	30	94.3333	8.95425	35	114.714	8.06996
EIF4B	3	108	43	82.1628	5.7664	24	85.0833	8.00952	41	90.2927	8.47232
MARCKSL1	3	108	45	83.8889	4.88204	35	101.257	6.93707	28	113.607	7.07492
PPIB	3	108	57	91.2632	6.68748	26	94.3846	8.89935	25	95.48	7.98922
PTBP1	3	108	46	98.5435	6.79783	32	94.5312	7.4837	30	105.633	9.00549
TECR	3	108	46	80.1957	6.90679	35	64.3429	4.53286	27	98	12.5045
TMEM9	3	108	42	80.9762	5.90932	30	91.4	7.71558	36	95.2222	8.04732
AP2S1	3	107	59	84.661	4.29397	21	93.7619	8.39552	27	82.7778	6.83879
COA1	3	107	47	75.4681	4.81461	35	87.2	7.97166	25	115.68	11.2791
HTATSF1	3	107	45	80.4889	6.35786	32	109.438	10.5051	30	111.867	8.96855
PRPF19	3	107	40	80.125	6.68508	34	101.147	8.07749	33	90.9394	6.39372
PSAP	3	107	53	114.868	7.39377	32	115.031	9.12965	22	94.7727	12.9094
EIF2S1	3	106	44	84.1591	6.27692	36	78.2222	6.44098	26	91.5385	8.87407
EIF4A3	3	106	39	68.3077	6.09525	30	76.8667	6.56247	37	102.459	7.48103
LARP7	3	106	55	90.1455	8.04879	33	83.4545	5.4764	18	98.4444	12.6718
LUC7L2	3	106	48	94.9167	7.40653	21	106.905	11.9028	37	81.2432	5.66594
MAGED2	3	106	65	99.7385	6.03419	24	106.083	8.34893	17	92.2353	10.9398
SAE1	3	106	46	81.3478	5.93237	35	87.6571	6.28701	25	104.76	10.2566
SELENOF	3	106	37	97.1892	7.76808	35	97.5143	5.90252	34	123.559	12.2888
CDC20	3	105	49	86.2245	6.52712	25	80.84	7.49478	31	100.032	8.92406
CDK1	3	105	49	93.0816	5.99033	24	106.5	14.1398	32	106.875	10.776
EI24	3	105	50	87.42	5.58284	30	81.5667	7.34222	25	100.72	9.86477
GOLM1	3	105	46	100.457	7.35571	29	92.8966	6.09308	30	105.3	10.5883
MZT2B	3	105	44	92.1591	6.63317	33	110.97	7.71752	28	114.964	9.79867
NUCB2	3	105	46	66.3261	4.47457	25	70.04	6.00093	34	82.1765	6.44332
POLR2A	3	105	20	101.55	10.6176	33	131.273	12.2989	52	121.654	8.11424
PRELID3B	3	105	41	92.7805	5.51462	34	98.7353	6.52017	30	105.9	11.156
UFC1	3	105	62	72.5	4.28831	20	65.45	7.16431	23	85.2174	7.07613
CBY1	3	104	37	93.6757	8.76827	33	104.061	9.16164	34	104.059	8.81695
ITGAE	3	104	41	96.7317	7.20045	37	106.622	9.54619	26	107.423	7.71596
LAPTM4B	3	104	44	96.5227	6.41195	32	91	6.92369	28	98.1429	9.36977
NDFIP1	3	104	44	83.5	5.77823	23	79.913	8.55051	37	109.514	9.20195
PDCL3	3	104	48	84.6667	6.3616	32	91.0938	9.37212	24	91.875	9.01394
PFN2	3	104	54	100.111	5.42214	31	83.5484	5.0442	19	99.6316	12.1154
PRPF38A	3	104	46	85.0217	5.85687	27	99.5185	7.89095	31	96.7419	7.60757
SRRT	3	104	38	98.0789	8.48874	31	99.2903	9.38207	35	117.343	8.37303
TRAPPC2L	3	104	60	83.7	5.37108	23	91.7391	6.52818	21	87.9524	10.7282
VDAC1	3	104	32	94.1875	10.1057	36	100.056	8.83298	36	105.028	7.88483
AL031587.6	3	103	27	88.4815	10.1872	40	96.45	8.89121	36	117.306	8.0153
ARL16	3	103	38	93.2895	7.89718	34	92.7353	6.46729	31	125.839	10.9415
BRD2	3	103	26	116.038	11.2215	21	133	16.7398	56	121	8.62291
CBWD2	3	103	53	83.4906	6.05032	24	79.75	6.70723	26	95.6154	9.53506
CCDC124	3	103	62	87.8065	4.85218	22	74.1364	5.6067	19	101.684	15.7447
COA3	3	103	48	85.0417	6.28179	37	81.2162	5.35123	18	85.7222	8.08321
COX5A	3	103	37	118.135	7.9906	38	115.658	7.08352	28	131.893	12.1385
EXOSC9	3	103	39	87.5385	6.57779	22	82.9545	8.86969	42	117.357	9.03576
FNTA	3	103	31	64.0323	5.82282	30	85.1333	9.16609	42	109.524	7.68507
MRPL50	3	103	50	95.58	7.51341	27	87.3333	5.53899	26	81.1154	6.152
PLS3	3	103	50	107.1	5.85793	20	92.9	10.2201	33	120.727	8.18824
RBM42	3	103	35	88.4	7.54461	27	82.7407	7.28314	41	80.2439	7.6995
SDHA	3	103	45	87.5556	7.05503	27	113	12.6735	31	110.613	12.936
UQCRC1	3	103	57	87.807	4.7966	25	89.12	9.35749	21	91.4286	12.8802
VTI1B	3	103	56	83.2321	4.9047	32	81.3125	5.98622	15	87.3333	9.17759
BEX2	3	102	38	88.2632	6.70177	36	91.8056	7.73199	28	98.5714	10.0082
CNIH1	3	102	46	91.3913	8.04515	26	88.0769	8.53429	30	100.233	7.63889
GTPBP4	3	102	42	83.7143	7.31269	25	88.28	8.87433	35	105.086	10.5734
KDELR1	3	102	51	82.7451	4.98609	26	80.6923	6.26198	25	99.84	10.0912
PMPCB	3	102	43	85.0465	8.65085	40	93.15	7.08057	19	139.158	16.6991
PSAT1	3	102	49	92.0816	6.5704	28	90.3571	7.3226	25	115.32	11.2507
SLC35B1	3	102	36	79.4167	8.91917	38	84.5	5.57382	28	80.4286	7.71072
C8orf59	3	101	48	81.1458	5.29117	28	91.3214	10.2357	25	92.48	9.66033
CHCHD7	3	101	39	115.051	7.75275	35	116.314	8.37214	27	142.963	8.78637
CLPP	3	101	43	86.907	5.52058	24	92.25	8.15481	34	118.647	8.61307
FKBP1A	3	101	53	94.8302	5.28812	28	79.7857	6.25201	20	98	12.7875
GPATCH4	3	101	45	76.6667	5.829	33	88.697	6.90024	23	78.3043	11.6931
PMF1	3	101	55	91.4	6.38949	28	83.6429	6.11877	18	85.7778	13.5905
PPIF	3	101	39	97.7949	8.11944	30	115.8	10.187	32	91.6875	7.07279
PPP1R14B	3	101	62	96.0806	4.95144	26	104.308	8.23396	13	106.154	9.87906
TSPAN13	3	101	47	73.0426	4.98045	29	98.0345	9.0277	25	94.56	12.2365
ACTR2	3	100	52	98.1731	6.74809	27	92.963	8.2551	21	96.8095	13.2212
CELF4	3	100	21	50.2381	5.80871	39	58.5385	5.29186	40	66.25	6.77124
CYB5A	3	100	31	78.9355	8.26347	37	95.7838	6.44776	32	107.656	7.23566
IMMT	3	100	36	90.3611	7.31133	33	98.697	9.1649	31	108.871	11.1039
MIF	3	100	46	80.7826	5.57903	29	99.4828	7.21252	25	126.84	11.8506
MRFAP1L1	3	100	38	92	7.00524	29	89.0345	7.11858	33	99.2424	8.93616
PSMD11	3	100	34	107.765	9.67196	40	119.35	7.55824	26	129.577	10.8403
PSME3	3	100	38	106.289	8.65665	25	88.68	8.19165	37	102.703	7.90926
RPL26L1	3	100	51	81.3137	5.93088	28	80.6071	7.35998	21	88.381	7.41864
RRP36	3	100	46	83.2609	5.72383	21	96.6667	11.5982	33	95.3333	7.267
TCEAL8	3	100	41	78.4634	5.30409	31	90.2258	8.61317	28	90.9286	10.0073
COX7A2L	3	99	41	78.1463	6.89675	32	79.5938	4.5584	26	101.192	9.26293
CTDNEP1	3	99	40	88.525	6.78279	19	105.053	9.29524	40	107.3	7.34942
FAM103A1	3	99	30	72.6333	6.85606	33	91.7273	7.61749	36	94.6667	8.21086
POLE3	3	99	49	97.4694	6.68504	26	89.4615	6.34423	24	109.833	9.11342
PPT1	3	99	39	84.4872	7.33879	30	88.3	5.95728	30	101.833	8.49432
PSMB4	3	99	44	82.2045	5.90459	29	93.3103	10.0805	26	123	14.0628
RARS	3	99	40	88.05	6.04865	28	91.4286	8.06391	31	111.387	7.44787
SDHC	3	99	43	89.7907	5.47096	23	81.9565	6.72508	33	97.9091	8.79126
TRAP1	3	99	41	89.5122	7.76661	29	98.0345	10.8173	29	81.5517	7.32977
BCL2L12	3	98	48	87.7917	7.43939	23	78.3043	7.95769	27	97.4815	9.92045
CNIH4	3	98	41	91.5854	8.30071	26	92	9.74072	31	105.806	11.9713
EBNA1BP2	3	98	43	75.3023	7.68044	23	63.3478	6.70823	32	94.875	7.55316
HAX1	3	98	39	74.7436	6.29963	25	86.76	6.88471	34	88.5588	10.4045
KPNA2	3	98	39	96.2821	6.68911	27	106.148	10.825	32	113.375	7.86901
NRBP1	3	98	29	70.6207	5.72256	25	85.16	8.31532	44	95.75	6.3814
NSL1	3	98	34	82.9118	5.37574	38	97.8158	7.04761	26	97.6923	9.2798
PWP1	3	98	45	71.4889	4.96264	26	74.2308	7.02875	27	82.3704	7.8627
SAP30BP	3	98	35	89.4571	6.16658	33	90.6667	8.34953	30	104.733	9.28151
SNRNP70	3	98	42	102.548	6.87977	23	111.174	10.8544	33	109.879	9.71738
SPOUT1	3	98	55	83.6727	5.40169	25	89.64	9.21562	18	107	9.07275
ACAT2	3	97	52	73.6731	4.73333	22	88.2727	10.5161	23	100.348	10.2046
CSE1L	3	97	35	81.4	6.48051	30	84.5667	8.6788	32	102.594	8.38186
DDRGK1	3	97	50	81.44	6.59018	27	78.9259	7.83768	20	99.9	10.2711
GNAO1	3	97	13	94.2308	15.8391	31	77.9355	7.46019	53	77	4.7452
MRPS33	3	97	45	98.0222	7.29712	25	80.2	8.2297	27	108.704	8.19897
NEDD8	3	97	40	104.425	9.95583	36	86.9167	7.37691	21	103.857	9.23006
SNF8	3	97	47	80.0851	7.36175	26	79.6538	11.2638	24	97.9167	12.0802
STIP1	3	97	36	87.1111	6.13113	27	93.4815	7.29477	34	91.3529	7.28912
TXNL1	3	97	39	80.3846	7.58477	20	80	9.35655	38	99.1053	10.7553
TXNL4A	3	97	41	95.5854	6.93155	28	88.4286	8.08223	28	93.6786	6.52567
YY1	3	97	39	103.333	7.36039	27	91.7778	9.15247	31	106.032	10.7285
ADSL	3	96	47	88.5957	7.05091	26	85.6154	6.80586	23	86.3913	9.3049
COX11	3	96	38	88.4737	6.58828	29	71.7586	6.74359	29	86.7931	7.62051
NOP16	3	96	29	103.138	8.84692	33	90.7576	7.92191	34	99.6471	6.68558
RTN4	3	96	39	90.1026	7.97504	25	73.76	7.08944	32	111.781	9.58471
SMS	3	96	44	70	4.72869	26	82.3077	7.1144	26	94.5	11.8785
TKT	3	96	45	93.2444	7.55413	27	88.5926	8.93311	24	105.542	8.60878
TMCO1	3	96	53	83.4528	5.38623	20	88.1	5.91223	23	79.7391	7.93885
TMEM106C	3	96	52	105.404	6.59227	33	95.6061	7.13402	11	141.545	23.7283
TMEM14C	3	96	49	74.0408	5.50914	29	74.5862	6.72025	18	83.1111	9.74201
CD99	3	95	53	89.434	6.53895	26	98.6923	7.87284	16	90.375	8.54166
CHCHD3	3	95	33	87.697	6.43659	34	95.3529	7.13645	28	91.7857	7.691
MRPL46	3	95	40	82.175	6.34782	25	92.76	6.91417	30	97.9	7.5819
PPP2R5C	3	95	35	84.8286	6.73747	32	92.5	7.95286	28	104.679	10.4146
PPP6C	3	95	32	86.5312	8.4236	29	109.448	7.58755	34	106.765	9.38913
RNF187	3	95	37	110.703	6.07536	26	121.077	10.8056	32	127.031	10.2535
RPAIN	3	95	37	92	8.36311	17	97.9412	14.3364	41	107.537	11.425
RTL8A	3	95	31	98.2581	9.68537	26	114.538	9.89191	38	97.2368	7.52783
SLAIN1	3	95	47	84.3191	4.80362	19	103.105	10.273	29	100.966	7.89339
SYF2	3	95	27	94	9.54852	31	76.129	6.32632	37	112.054	8.62564
ARL6IP1	3	94	37	79.7568	6.19684	29	96.7586	7.72778	28	105.429	11.3157
ATP5EP2	3	94	28	124.321	8.95568	33	122.061	6.17661	33	135.848	10.3235
ATP5O	3	94	56	96.4107	7.6857	24	95.25	10.2387	14	111.143	15.9242
CS	3	94	40	75.675	6.57955	23	86.1739	6.9322	31	128.452	11.4539
FXR1	3	94	37	93.5405	8.94644	22	112.318	10.8653	35	110.171	9.20714
KAT8	3	94	27	89.3333	9.37118	27	80.8889	7.70358	40	115.575	10.7415
MCFD2	3	94	45	82.8444	7.56626	30	84.8333	6.99255	19	91.8947	12.0644
P4HB	3	94	51	89.7843	5.18125	20	102.1	6.7996	23	106	11.8157
RPA3	3	94	46	86.2609	5.93223	27	119.037	12.3916	21	114.857	11.9278
ARF4	3	93	41	92.1463	7.31338	30	105.033	9.63322	22	108.364	9.52716
BANF1	3	93	46	104.891	8.18496	25	121.88	11.3051	22	159.864	13.368
CENPW	3	93	42	85	7.08228	25	83.24	7.15705	26	93.6538	8.30857
CHMP2A	3	93	36	88	6.25993	29	100.552	6.97977	28	96.5714	7.96908
DBI	3	93	46	105.391	7.5051	29	109.621	8.49038	18	97.1111	7.50386
EIF2AK1	3	93	46	98.6522	7.225	24	88.9167	8.62549	23	130.478	10.6498
GDI2	3	93	37	78.6757	5.91084	32	85.7812	9.5739	24	97.3333	10.026
GRPEL1	3	93	49	90.6939	8.19525	18	103.556	8.54083	26	103.346	9.26387
HLA-B	3	93	58	95.1379	6.28095	22	106.045	11.2199	13	96.0769	14.2291
MCRS1	3	93	35	104.029	9.52132	36	100.417	6.98316	22	116.955	15.6387
RCN2	3	93	44	102.886	8.82095	22	95.6818	9.77587	27	108.778	10.0068
SRP19	3	93	35	92.6	7.74367	29	88.3103	8.15079	29	106.069	10.7553
SVBP	3	93	45	89.6667	7.26017	25	80.32	7.26784	23	83.7391	7.69607
TPGS2	3	93	48	77.875	4.78783	25	96.04	7.51968	20	107.85	14.8559
ARL6IP4	3	92	40	106.05	8.32533	26	109.077	11.8887	26	141.308	17.5151
ATG3	3	92	39	74.5897	4.76602	22	80.9545	8.57405	31	106.097	8.33749
CCNH	3	92	33	102.788	11.5215	21	109.048	15.3756	38	121.368	11.1543
CSRP2	3	92	38	82.6579	6.63996	33	81.8182	5.97031	21	103.286	11.9828
MAPRE1	3	92	35	104.057	6.16189	29	80.7931	6.55034	28	92.2143	8.21232
NT5DC2	3	92	49	101.245	7.64686	28	109.429	7.87408	15	91.8	13.618
NTPCR	3	92	52	92.8846	5.80608	24	84.625	8.79568	16	98.25	8.96238
PSMC1	3	92	50	79.86	6.80494	16	112.062	11.1027	26	100.846	10.482
SNX17	3	92	38	84.7105	6.71325	34	83.6176	6.14432	20	76.15	9.93964
SSR3	3	92	44	73.6591	5.58295	22	82.2273	8.4933	26	104.5	9.20144
VBP1	3	92	37	94.9459	6.39804	32	110.594	9.46528	23	122.348	9.96717
ZNF768	3	92	33	93.5455	8.44559	20	69.35	6.50126	39	96.2308	7.92241
CPSF6	3	91	31	93.9355	8.33819	28	86.5	9.20868	32	145.781	14.8973
MGST1	3	91	49	81.9388	5.44385	23	90.3913	10.6079	19	97.6316	7.34478
NUP88	3	91	31	94.871	9.81099	31	102.419	8.43754	29	92.7931	9.85898
PPA2	3	91	43	88.3721	6.81328	25	82.56	5.77971	23	99.6957	11.1181
RTN3	3	91	42	85.3333	7.00386	26	82.5385	9.00152	23	107.652	11.2916
SAFB	3	91	30	118.633	8.80776	28	89.25	8.66609	33	108.485	7.10826
SMARCA5	3	91	34	98.1471	7.75246	28	95.6786	11.3107	29	112.345	7.90555
TMED2	3	91	49	84.2041	6.16286	19	107.053	10.3009	23	105.783	9.7993
TRA2B	3	91	44	77.2955	7.65842	22	103.182	14.2756	25	133.4	10.7687
UBE2N	3	91	32	79.5	6.31513	30	81.3667	7.03854	29	98.5862	8.87266
ACTR10	3	90	34	83.7647	6.77149	22	85.5455	7.81732	34	115.412	7.16019
ACTR3	3	90	40	85.375	6.17239	29	80.2759	8.42508	21	109.238	10.6632
ANAPC11	3	90	47	78.0851	6.34641	33	84.9091	8.72447	10	99.5	13.4961
CMSS1	3	90	41	68.1707	5.54275	29	73.4138	7.79486	20	100.4	9.49537
GMPS	3	90	38	86.5789	6.17358	17	106.588	16.6808	35	118.714	9.76705
LLPH	3	90	48	86.1667	6.5468	22	76.2727	7.5112	20	86.95	7.72738
MAD2L1	3	90	40	95.025	8.35714	34	91.7059	7.40482	16	92.25	10.217
PPID	3	90	34	88.1471	6.43871	28	95.2143	9.84139	28	102.893	8.82603
RABGGTB	3	90	30	117.233	11.6867	24	106.042	13.0939	36	123.389	9.81018
REEP4	3	90	35	92.5714	9.29308	25	100.36	9.09837	30	92.1	8.41326
SUPT4H1	3	90	40	90.025	5.98535	28	83.2857	7.04972	22	92.6364	10.3757
UBE2M	3	90	52	82.3077	5.82032	21	99.7619	13.6966	17	95.4706	8.68643
ZNF503	3	90	35	106.743	8.19022	19	99.0526	11.1048	36	105.611	6.95802
EEF1D	3	89	43	72.3256	5.57429	25	96.76	9.81253	21	104.857	13.2771
HARS	3	89	39	86.1795	7.7367	24	95.625	8.93958	26	113.462	12.6563
LRRC59	3	89	24	103.292	9.829	29	111.931	8.03499	36	128	8.76925
MAGED1	3	89	43	107.395	7.64357	21	88.7619	5.53238	25	106	11.6656
RPF1	3	89	33	96.7576	9.03244	25	93.64	7.50528	31	105.935	7.35582
YBX3	3	89	49	69.3265	5.50418	25	82.24	6.85957	15	109.067	9.89566
ARPC3	3	88	47	85.9787	7.41803	19	92.0526	8.4776	22	99.1818	9.03177
COPB2	3	88	33	85.8182	6.98699	23	93.9565	10.237	32	111.656	10.5374
DERA	3	88	38	63.3158	6.08528	21	88.4286	9.10846	29	108.552	11.1773
DLD	3	88	39	95.7949	10.1217	22	89.3636	9.1558	27	97	9.66986
EMG1	3	88	31	85.5161	8.07675	21	111.19	11.6266	36	112.028	6.86763
FDX1	3	88	35	83.8571	7.3476	25	95.56	8.24448	28	105.357	11.0205
NDUFAF6	3	88	41	80.0244	7.12675	22	87	9.43683	25	92.56	7.30152
OCIAD1	3	88	40	97.575	7.38833	25	93.08	11.6559	23	114.435	14.7075
PCBP1	3	88	39	104.821	7.54839	16	108.438	10.4582	33	111.515	8.09597
PHF6	3	88	29	136.276	8.85528	18	105.444	10.1414	41	119.244	7.87686
PRPF40A	3	88	39	106.641	8.4902	21	126.619	17.9371	28	102.893	11.1612
RAB1B	3	88	54	92.3889	6.24793	19	88.4737	10.1878	15	93.4667	6.16143
TALDO1	3	88	36	83.1667	5.8866	27	100.963	8.84317	25	112	11.4594
DNAJC2	3	87	37	75.8108	6.03446	23	107.696	13.6941	27	102.37	12.7004
LAPTM4A	3	87	42	88.6667	6.79766	19	93.4737	10.7609	26	89.1538	7.38956
MGST2	3	87	37	66.5405	7.46294	30	73	6.5769	20	124.35	15.0144
PPP2R1A	3	87	38	102.447	7.27447	35	93.1143	6.82358	14	99.0714	9.26066
PRKAR1A	3	87	36	102.667	7.30191	23	126.957	13.8244	28	111.321	10.5411
PSMB3	3	87	37	84.5405	6.00506	37	96.6757	6.35762	13	96.3846	14.1729
PSMD7	3	87	31	77	7.62137	21	68	8.07224	35	96.1429	7.00812
SMARCE1	3	87	32	65.5	8.16672	19	81.1053	10.2681	36	92.9444	8.58751
TPM1	3	87	44	77.75	6.46934	23	77.9565	6.53375	20	108.65	11.4532
TSPAN31	3	87	30	107.6	7.67935	30	99.1667	9.40863	27	118.889	12.1135
CELF2	3	86	15	65	10.0806	28	71.6071	8.07227	43	83.9535	6.82969
DHX9	3	86	34	109.765	10.3882	26	87.4231	8.27543	26	124.769	12.1033
EXOSC2	3	86	37	75.7568	6.49936	24	82.0417	8.0168	25	107.28	12.1104
EXOSC7	3	86	41	77.9756	6.25271	23	98.1304	9.65086	22	118.182	12.7481
HDAC1	3	86	43	97.1628	6.4287	28	112.964	10.717	15	132.2	11.1096
LUC7L3	3	86	43	78.4186	7.07483	21	94.3333	11.6581	22	89.5455	11.92
MRPL20	3	86	39	97.8205	7.00783	24	94.25	9.68537	23	156	12.184
PEF1	3	86	43	105.86	8.80936	23	98.4783	8.65378	20	92.7	11.398
R3HCC1	3	86	37	81.1351	6.30051	22	77	5.81108	27	88.6667	10.3726
SERPINH1	3	86	31	88.1613	6.45308	26	100.577	7.41863	29	96.5172	9.759
TRIP6	3	86	27	86.9259	9.5043	23	105.174	14.1239	36	117.917	9.54702
C21orf59	3	85	28	94.7857	10.9826	27	115.593	8.46866	30	100.3	8.7034
CMIP	3	85	39	53.8462	6.17257	24	53.2917	6.38642	22	47.3636	5.86436
COPB1	3	85	38	107.5	8.75851	25	85.68	11.6199	22	77.8182	11.1358
DNAJB1	3	85	29	99.1724	9.50124	21	104.333	12.0626	35	99.7429	7.86471
EBPL	3	85	37	79.0811	5.92754	29	64.2414	5.30265	19	80.7895	7.75225
MRPL10	3	85	37	83.7568	7.10131	24	73.6667	6.90503	24	94.875	9.02222
UBE2K	3	85	36	87.3056	6.21612	18	89.7778	8.84522	31	103.903	8.32775
ZMAT2	3	85	30	85.7667	7.19825	36	81.9444	5.30286	19	111.684	12.1327
ADI1	3	84	38	87.0789	5.81173	29	92.4483	7.53724	17	100.706	11.4165
AURKAIP1	3	84	29	105.483	8.45223	22	121.591	12.3475	33	130.939	8.95945
CNOT7	3	84	35	72.9714	7.9927	18	85.8333	11.0535	31	96.6129	9.57773
CSNK1E	3	84	32	94	9.01009	26	100.538	10.9261	26	92.9231	8.38989
INTS13	3	84	40	95.45	7.98185	23	97.7826	8.14193	21	112.905	8.27336
LUC7L	3	84	37	101.919	8.76538	14	115.071	21.5294	33	91.0303	7.32901
PSMD3	3	84	40	100.85	8.06579	22	101.409	8.28761	22	86.0455	8.80845
RAP1A	3	84	39	94.7436	8.05608	23	93.2609	9.83728	22	88.1818	8.62287
SLC1A5	3	84	39	81.2051	7.83552	20	83.05	7.57907	25	97.24	9.85532
TAF1D	3	84	40	104.175	9.59231	20	102.75	13.9905	24	125.292	13.2486
TSN	3	84	33	80.4848	6.3867	25	87.36	7.46831	26	101.769	9.45533
CDC42	3	83	38	85.6842	6.96987	16	108	10.5885	29	87.5517	9.14848
EIF3K	3	83	44	83.5909	7.20131	17	85.8235	8.17847	22	103.818	6.64216
GSPT1	3	83	40	89.125	6.62506	18	99.7222	11.088	25	111.8	10.1041
HDGF	3	83	37	91.0541	8.34605	28	95.3571	9.7663	18	116.333	9.79764
IDH3G	3	83	35	96.6571	8.35156	28	108.857	10.886	20	90.05	14.3778
PTMS	3	83	35	116.543	8.60663	21	115.19	9.43954	27	152.222	11.8317
RPN2	3	83	36	89.0278	6.50635	24	80.6667	7.28385	23	116.435	10.0236
U2AF1L5	3	83	26	113.231	8.93754	22	99.5	12.3417	35	128.514	8.81949
VAPA	3	83	33	90.0909	6.26817	16	87.9375	10.1587	34	107.118	7.88759
ZNF703	3	83	28	93.3214	8.39309	24	113.5	11.582	31	116.774	10.46
AMD1	3	82	33	113.091	7.8892	18	114.278	12.5742	31	118.645	10.1402
CAMK2B	3	82	19	57.2632	5.69825	30	63.8	6.0967	33	70.5152	7.17908
CCDC167	3	82	42	79.2619	6.6146	18	74.6111	7.78299	22	85.2273	9.96604
COX17	3	82	32	113.344	10.1113	28	123.75	10.3945	22	139.818	12.2349
DDX47	3	82	28	105.857	10.2977	16	107.312	16.8569	38	107.895	8.47408
GAS5	3	82	24	81.25	8.04615	34	96.2353	6.73781	24	114.042	11.2261
RCC1	3	82	28	74.3214	9.15472	30	97.3333	8.90073	24	78.2917	8.87891
TRUB2	3	82	34	68.3529	6.05738	29	74.6897	5.00228	19	96.8421	12.4262
TSPAN6	3	82	39	79.3077	5.93224	21	74.381	7.53841	22	86.9545	8.34966
ALDH7A1	3	81	47	105.979	5.74188	14	109.357	11.9722	20	126	10.7956
BSG	3	81	50	93.96	4.89726	19	94.4211	6.00292	12	110.917	14.6565
CCDC59	3	81	31	68.4516	5.29324	20	73.8	7.9786	30	94.3333	7.93352
CCZ1	3	81	38	91.7895	8.97397	23	105.696	12.5838	20	82.3	10.1126
CTBP2	3	81	22	94.9545	7.60504	31	87.129	5.64963	28	110.857	9.03687
GTF2H5	3	81	37	82.3784	6.10911	22	100.5	9.82192	22	104.091	9.81648
LRPAP1	3	81	36	80.8056	6.44358	21	74.4762	8.88363	24	85.125	8.78096
MPDU1	3	81	44	69.4545	5.25874	19	94.1579	9.22248	18	95.6667	13.9295
MRPL21	3	81	29	98.3103	9.27222	31	95.1935	9.85307	21	130	11.5094
MRPS7	3	81	32	68.0625	5.28577	24	84.4167	6.80046	25	84.4	7.98939
NUP37	3	81	31	77.871	5.94752	23	84.1739	7.84723	27	115.37	7.28965
PPIE	3	81	42	78.1905	4.95676	19	92.8947	7.98541	20	107.2	16.1874
CDC123	3	80	34	83.6176	5.85376	20	80.05	8.20075	26	110.654	9.24725
CHMP4A	3	80	46	89.6739	5.2848	20	88.65	9.16468	14	131.643	15.3016
DDX21	3	80	32	110.125	11.4679	21	99.9524	10.0744	27	99.0741	10.1641
DTD1	3	80	28	87.0357	9.05616	27	97.3333	8.92093	25	100.96	7.92353
EAPP	3	80	35	90.5714	6.80555	16	97.75	11.5188	29	100.966	7.72975
EIF5	3	80	30	90.1667	7.66537	11	92.7273	13.5988	39	119.077	9.08282
GSTP1	3	80	32	126.438	13.7755	22	110.364	8.60774	26	106.077	8.47375
KPNB1	3	80	32	112.344	9.97229	20	72.85	6.12873	28	132.429	11.1069
MCM6	3	80	37	103.541	8.5732	22	91.1818	10.4323	21	106.762	9.57271
NAXE	3	80	40	73.175	6.25619	23	90.5217	6.69674	17	120.471	15.2409
NDUFB9	3	80	31	90.871	9.59619	26	70.7308	5.73723	23	97.4348	9.55292
NDUFS3	3	80	34	91.0588	10.0003	20	98.6	7.60408	26	84.8077	10.3236
SRPK1	3	80	35	84.1714	7.11394	17	92.7059	14.0759	28	136	14.2964
SRPRB	3	80	34	82.3824	5.26265	24	92.75	7.74423	22	102.591	10.7409
SUV39H2	3	80	36	76.6667	7.02948	17	81.6471	7.24315	27	72.9259	7.57186
TIMM17A	3	80	36	79.6944	6.0689	18	96.6667	9.63308	26	83.1538	7.06912
ATP6V0B	3	79	37	97.4324	6.85267	23	97.5217	8.72276	19	93.0526	7.22663
IDI1	3	79	35	94.4571	8.21639	22	94.3182	11.6238	22	95.5	11.9912
ISCA1	3	79	28	92.0714	7.84413	14	100.929	12.0676	37	102.73	7.50609
KLC1	3	79	28	103.429	9.71723	21	89.0476	10.8013	30	94.4	8.85483
LSM1	3	79	37	96.2432	8.11022	22	98.3182	9.0844	20	101.55	10.5094
TFG	3	79	37	96.8649	7.47161	25	79.88	5.27343	17	102.882	16.4737
TMED9	3	79	24	89.5417	7.4489	28	117.107	8.80447	27	131.556	12.402
TRMT10C	3	79	31	90.9355	7.73117	25	113.44	9.57281	23	96.2609	8.31111
AGPAT1	3	78	37	88.9189	7.07183	22	93.9091	8.58668	19	85.3684	8.10055
ANAPC15	3	78	48	85.3333	6.85625	18	81.2222	8.60755	12	95.25	13.2409
APIP	3	78	31	88.5161	6.5424	22	98.2273	12.2004	25	82.28	8.45459
CTPS1	3	78	37	121.703	12.1284	19	102.474	13.6415	22	112.318	12.6555
LONP1	3	78	37	90.1081	6.33987	26	106.154	7.63414	15	99.2	14.9975
NOP10	3	78	39	95.6154	5.7697	18	120.444	9.2943	21	124.381	9.65798
RAB7A	3	78	25	98.6	9.28638	24	95.0417	11.3498	29	102.483	10.8734
RALY	3	78	38	97.7368	6.93117	18	94.1111	7.24181	22	98	7.92996
RBX1	3	78	40	78.025	6.10066	21	84.6667	7.03903	17	80.2941	8.60344
RFC3	3	78	29	94.3793	9.3201	25	92.08	8.33612	24	98.125	11.0097
SNW1	3	78	37	85.5676	6.57313	15	95.2667	9.52632	26	89.5769	8.20253
UQCRC2	3	78	31	78.6774	5.4792	20	98.85	8.53237	27	104.111	8.25641
BAG2	3	77	25	106.44	8.65278	28	94.6786	6.41508	24	102.417	8.98628
CAPZB	3	77	38	91.4737	7.2618	22	91.0909	13.5908	17	107.882	11.2996
CENPK	3	77	38	93.5526	8.36186	13	70.5385	6.25458	26	103.5	8.91997
DNTTIP2	3	77	27	86.8519	9.20155	19	86.8421	6.42073	31	101.194	8.92102
EIF6	3	77	27	95.3333	9.41601	28	93.25	7.64413	22	111.091	12.4426
HIKESHI	3	77	37	71.8108	7.34368	20	94.65	14.5743	20	92.8	7.46646
MANBAL	3	77	19	92.8947	11.4175	22	97.7727	9.19372	36	101.944	7.64146
PSMD13	3	77	29	73.1379	6.45514	28	86.4286	7.29943	20	84.4	12.3281
RBBP4	3	77	38	98.0789	7.44587	26	105.885	10.3951	13	84	16.178
RPL37	3	77	26	122.231	10.9491	24	127.417	8.82053	27	129	10.0229
SEC61G	3	77	39	94.1026	6.07847	26	103.308	8.27089	12	111.833	11.8783
TIMM50	3	77	37	81.7027	6.29258	18	100.667	15.3553	22	114.318	13.5851
TSPYL1	3	77	30	121.367	7.88902	23	112.478	10.4698	24	111.625	12.8647
TSR1	3	77	37	94.3243	8.75676	18	80.3889	10.0662	22	94.0455	8.29181
UBE2V1	3	77	37	79.4054	8.00488	18	93.3333	11.8032	22	95.8636	11.0312
UQCR11	3	77	37	89.7297	7.06638	26	81.2692	8.38507	14	85	14.1616
CDC6	3	76	23	89.0435	9.06779	28	93.4643	7.18585	25	104.6	9.49155
DNAJB11	3	76	33	81.3939	7.06664	18	87.1667	8.55348	25	117.56	10.921
FAIM	3	76	35	69.5429	5.96621	16	77.125	8.56997	25	97.48	11.4675
GTF3A	3	76	43	90.4884	11.4552	20	74.55	7.02904	13	104.538	13.4149
ISOC1	3	76	23	84.5217	7.59959	28	93.6429	7.19538	25	102.52	7.65101
MOB1A	3	76	24	89.1667	9.76186	23	82.9565	11.2669	29	121.483	9.39421
SIKE1	3	76	38	96.6316	8.65237	18	102	13.4014	20	137.1	14.3092
TCEAL4	3	76	36	67.1111	4.67373	23	100.826	9.36806	17	114.824	15.1297
TIMMDC1	3	76	35	88.4571	6.57085	16	84.6875	10.2449	25	104.04	10.3204
UFD1	3	76	39	82.2051	6.83218	26	89.0385	7.43343	11	113.364	12.1147
IFT57	3	75	34	76.2353	6.44286	23	96.5652	8.48034	18	99.8333	12.2016
MDK	3	75	46	119.457	6.93882	19	102.789	8.51285	10	115.3	12.9823
MRPS36	3	75	27	96.2593	11.6331	23	90.2174	8.7897	25	114.28	12.6312
NDUFB3	3	75	30	99.2	8.28806	27	99.6667	9.70328	18	118.778	12.4108
PDHA1	3	75	33	89.3939	7.79111	24	99.5	10.2762	18	130.278	14.0547
POLR1C	3	75	18	98.1111	13.9355	21	87	8.6719	36	101.944	8.72929
PRKCSH	3	75	38	109.105	8.85555	16	112.625	13.715	21	103.857	10.57
RFC2	3	75	31	75.6452	5.69198	19	85.9474	9.34073	25	113.44	14.2339
RPL7L1	3	75	25	97.28	9.09866	19	83.4737	8.86194	31	117.839	10.3969
VTA1	3	75	30	85.9667	6.4695	23	86.1304	9.32065	22	90.5	7.02115
ATP1B3	3	74	39	70.5897	5.45795	19	82.0526	8.81213	16	92.375	12.9476
ATP5D	3	74	33	84.7273	7.85185	24	83.375	7.3489	17	89.5882	10.2664
CCDC94	3	74	34	63.0588	5.78133	20	79.5	6.04007	20	90.25	13.9528
CCNG1	3	74	31	72.0645	5.72232	24	74.3333	5.94934	19	93.0526	9.7411
CISD2	3	74	26	102.231	11.137	16	110	13.9799	32	103.719	9.40269
NOP58	3	74	31	88.3226	10.9052	18	90.2222	10.3951	25	83.76	12.0681
PHF23	3	74	35	76.9714	7.71963	18	87.8333	7.74088	21	105.476	13.4897
PPHLN1	3	74	23	91.913	11.6807	25	68.72	5.59558	26	96	10.8108
PRPSAP2	3	74	28	81.7857	6.97542	24	91.8333	8.74676	22	119.636	13.145
PRR13	3	74	42	91.0952	6.22516	20	78.8	8.87006	12	90.3333	15.8493
PSMB7	3	74	32	73.75	7.60358	15	88.7333	15.7944	27	89.8889	8.81907
PTDSS1	3	74	31	93.0323	7.54059	20	77.2	8.28662	23	117.217	9.90292
SNRPF	3	74	25	100.8	9.13017	18	111.667	12.2109	31	131.581	10.1294
STX4	3	74	28	84.7143	7.92839	25	94.04	13.9862	21	120.381	15.5421
TCTEX1D2	3	74	25	87.72	9.66586	21	95.0476	10.422	28	108.679	10.972
AURKB	3	73	35	99.0857	8.54447	15	92.8667	10.0239	23	99.8696	14.3348
EIF3A	3	73	35	92.6286	7.88023	15	90.6667	14.1348	23	83.2174	10.5145
FAM58A	3	73	22	93.5909	9.08356	23	91.7391	11.8659	28	92.2857	8.72085
FXYD5	3	73	39	78.5897	5.53831	21	91.2857	8.82024	13	113	19.2652
MRPL27	3	73	26	73.3846	7.18358	29	85.3103	8.42228	18	92.5	13.9149
SF3B1	3	73	31	108.355	11.0227	17	87.8824	10.2727	25	121.76	12.4211
SNRNP25	3	73	33	74	6.04255	24	88.5833	6.71698	16	116.875	14.2357
SNU13	3	73	37	97.5676	6.84489	13	76.1538	6.11608	23	117.217	11.5675
TIPRL	3	73	21	79	7.17106	21	96.0952	13.876	31	120.419	10.6037
TOP1	3	73	26	77.6538	8.87386	21	102.81	10.1254	26	101.115	9.66377
ACTR6	3	72	29	109.931	9.49985	18	123.056	12.984	25	97.72	9.76156
ADK	3	72	33	100.03	6.41244	22	83.4091	8.883	17	71.8235	7.16983
ARPC1A	3	72	31	86.6774	6.71547	24	102.75	8.344	17	105.412	10.6101
BUB3	3	72	33	91.1515	8.05253	20	94.15	10.858	19	121.684	15.1035
C1orf109	3	72	19	104.263	8.36357	25	122.12	10.1424	28	103.857	8.68463
CMC2	3	72	28	81.4643	6.85872	21	87.4286	8.97175	23	101.522	7.92161
EXOSC8	3	72	38	74	5.36119	13	122.846	14.7371	21	114.952	14.218
GATC	3	72	45	88	7.68214	15	100.467	10.0039	12	100.083	12.6894
GRINA	3	72	36	89.25	9.04186	21	83.2857	9.86304	15	118.933	20.9638
GTF3C6	3	72	36	75.6944	6.98033	16	106.438	9.53119	20	126.35	10.1765
MARS	3	72	35	81.4	6.87559	21	89	9.12324	16	85.8125	8.85791
MOCS2	3	72	33	76.6061	7.24083	17	86	8.62643	22	106.909	12.8772
MPST	3	72	27	70.8889	7.67218	25	77.96	6.26367	20	74.75	7.60982
NDUFAF3	3	72	24	126.375	12.5193	21	122.857	9.09095	27	111.889	9.42741
NDUFB6	3	72	32	92.3125	8.27416	24	99.75	9.61286	16	118.938	12.1698
PDIA4	3	72	33	124.727	8.14507	16	134	17.0289	23	113.304	14.7407
POLB	3	72	30	75.4333	6.09602	20	78.15	4.52177	22	104.273	9.51102
RAB8A	3	72	25	110.08	8.20749	25	92.88	7.23156	22	101.682	8.93304
RFXANK	3	72	42	79.5714	6.67016	22	103.409	9.603	8	92.625	17.3466
STK25	3	72	34	94.7647	9.49495	19	86.5789	7.70377	19	114.474	15.416
ACAT1	3	71	39	102.256	7.00218	16	110.75	16.7387	16	122.25	12.7685
ATP5E	3	71	31	113.065	8.49924	23	104.174	7.89766	17	121.882	11.8549
ATP6V0D1	3	71	30	87.1	8.8612	19	100.526	9.11526	22	96.5455	7.67354
C12orf10	3	71	22	79.5455	7.56452	25	74.04	7.08677	24	102.25	10.9486
C4orf3	3	71	34	79.2647	6.7802	17	78.9412	9.15362	20	119.65	12.1763
FABP5	3	71	37	81.8108	6.48624	18	79	9.98796	16	103.438	12.1787
GLRX3	3	71	32	79.6875	7.25706	19	81.6316	10.1986	20	109.8	10.5101
GNL2	3	71	24	75.125	6.07771	21	84.1429	12.2998	26	82.8462	9.27692
GRB2	3	71	33	82.9091	8.16669	18	91.7222	7.88686	20	108.15	11.3023
NUDT5	3	71	32	85.6875	7.48141	22	95	8.6817	17	82.5882	10.7967
RAD51AP1	3	71	17	132.471	15.4768	22	99.4545	12.1236	32	116.156	9.21638
RCN1	3	71	32	95.4688	10.5166	16	93.5625	12.0442	23	106.913	10.664
RTCA	3	71	24	88.125	10.6143	20	84.25	7.58349	27	103.704	8.19093
SPCS3	3	71	31	93.4194	7.0591	17	114.412	13.8257	23	114.478	8.97568
SRSF11	3	71	35	121.486	12.3826	13	112.538	22.3362	23	117.739	15.0163
SYAP1	3	71	32	86.5312	7.54168	21	93.2381	8.21643	18	86.4444	12.6221
TMEM33	3	71	34	76.8235	6.61712	10	101.4	14.5026	27	101.852	8.67753
ZNF706	3	71	28	69.4643	6.27424	20	60.7	7.7023	23	108.261	11.1784
CIRBP	3	70	28	96.5	7.93573	16	104.938	16.1268	26	108.038	8.2871
COPE	3	70	31	79.871	7.89061	22	89.5	8.10896	17	121.059	10.8349
DDX46	3	70	32	97.4688	6.93834	20	102.3	9.79671	18	100.556	11.0505
EIF4G1	3	70	39	100.795	8.0111	14	87.7143	9.20483	17	118.118	10.8446
ELP1	3	70	34	96.5294	7.6913	20	127.75	13.1801	16	120.312	16.0662
HNRNPH2	3	70	32	89.25	7.28802	21	107.714	11.3653	17	97.4118	14.1333
HOXB9	3	70	21	94.1905	10.552	21	77.9048	10.0676	28	94.1786	9.28531
PGD	3	70	33	98.5152	7.68684	18	88.1111	8.00651	19	118.474	13.2739
PIGK	3	70	29	76.1724	6.20193	23	83.0435	6.99567	18	108.889	10.9304
PRC1	3	70	39	108.974	8.80466	18	97.1667	11.9462	13	105.615	13.3548
PSMD4	3	70	26	101.769	9.53866	16	108.188	12.9618	28	119.714	11.9912
PTTG1IP	3	70	24	97.0833	9.46171	24	96.1667	9.77786	22	91.8182	12.0849
SF3B5	3	70	30	82.5	8.88841	21	106.381	11.5074	19	97.3158	9.29064
TIMM9	3	70	25	78.04	6.15285	16	93.375	11.2208	29	105.034	8.95988
UBE2E1	3	70	38	86.1053	7.54367	19	107.263	8.74091	13	82.1538	13.7095
WDR83OS	3	70	33	80.2121	6.09291	23	102.261	7.91907	14	128.357	10.0563
ZC3H15	3	70	35	77.6286	6.837	16	86.375	9.93057	19	91.7895	12.0898
CEBPG	3	69	24	74.8333	9.90435	11	80	13.6018	34	102.382	8.56373
EIF3D	3	69	22	112.273	12.9282	22	85.5909	9.02056	25	101.72	12.6478
GEMIN6	3	69	32	75.4688	8.19429	17	93.7059	11.4779	20	115.7	15.6475
GPS1	3	69	33	83.5758	6.76037	26	79.8077	6.25542	10	74.1	8.73092
HACD3	3	69	29	99.931	10.0582	21	81.2381	8.86531	19	87.0526	13.0315
LY6E	3	69	25	76.44	6.30557	23	93.3478	10.5633	21	95.2857	9.59122
MBD3	3	69	22	104.227	12.4663	26	86.2308	8.82628	21	95.0476	10.6763
MXRA7	3	69	36	102.222	7.4605	20	87.75	6.1842	13	112.615	10.7679
NAA10	3	69	34	72.3529	5.32928	24	83.5	10.1338	11	76.5455	9.32105
RAB5C	3	69	25	93.16	7.25086	18	86.1111	10.8006	26	91.5769	9.79285
STARD7	3	69	23	106.478	10.1657	20	79.45	9.78583	26	109.346	10.8958
TACC3	3	69	29	111.103	10.3119	23	115	10.1867	17	169.471	17.731
UBA1	3	69	28	97.3571	8.71505	16	73.625	8.98518	25	132.84	10.4795
VPS28	3	69	33	80.8485	7.01908	19	104.895	14.7862	17	112	14.7498
WDR34	3	69	42	93.7857	8.30222	13	68.6923	6.72308	14	82	11.8778
AP2M1	3	68	35	84.6857	7.03226	19	90.5263	12.6148	14	107.857	12.6349
CD164	3	68	29	111.69	12.1456	22	89.4545	9.09176	17	97.1176	13.6754
CLNS1A	3	68	30	89.4	8.9441	16	106.438	9.87973	22	123.591	9.60816
EEF1E1	3	68	27	84.1111	7.50004	20	78.3	7.40172	21	112.286	14.1827
FAM162A	3	68	24	90.0417	8.48272	25	93.4	8.35971	19	112.053	13.2509
KIF22	3	68	29	115.931	9.42407	16	95.75	8.34486	23	111.217	12.4231
KRT8	3	68	31	99.5161	9.47518	16	101.688	11.7512	21	101.952	8.73196
MPC1	3	68	32	79	6.72478	15	82.0667	10.2365	21	109.238	12.5869
NOC2L	3	68	32	98.5	8.65552	22	98.5909	10.8026	14	91.5	13.6014
RTFDC1	3	68	29	90.5862	6.41908	19	92.0526	8.12181	20	79.65	6.27307
SAP30	3	68	27	85.9259	9.92149	16	81.3125	10.8432	25	101.92	10.8854
SEPT7	3	68	32	78.4375	7.48918	15	78.7333	8.65459	21	96.8095	11.0371
SSR2	3	68	31	84	8.24242	16	85.6875	10.9796	21	78.0476	7.89054
TMEM230	3	68	29	85.2069	9.79036	30	90.7	6.97076	9	78	14.774
TMX2	3	68	28	77.9643	6.82927	19	81.3684	11.4897	21	107	10.5312
BABAM1	3	67	30	80.4333	7.45456	19	77.7895	8.19417	18	100.611	12.9691
BCLAF1	3	67	34	77.6765	7.57771	12	106.5	16.549	21	115.048	11.8503
CCDC58	3	67	23	87.0435	6.73492	19	85.9474	8.51704	25	85.68	7.30101
CDC7	3	67	24	105.75	10.2475	22	118.318	11.1291	21	117.143	11.8291
DANCR	3	67	20	87.5	7.84267	29	84.9655	6.06161	18	89.6667	9.6606
DAZAP1	3	67	28	94.5	8.74883	21	86.7143	8.73473	18	106.722	15.8369
DDOST	3	67	44	95.75	6.90027	16	91.8125	10.425	7	90.5714	11.2047
DNAJC17	3	67	24	87.4167	8.72913	17	92.8824	9.49809	26	110.115	8.11845
ELOF1	3	67	31	87.2903	9.42181	11	94.5455	16.798	25	85.2	10.2375
EZR	3	67	33	96.7576	7.68611	16	107.938	9.62844	18	115	7.98378
FARSA	3	67	24	80.5833	11.2038	21	80.7143	8.39127	22	112.227	10.211
GTF3C5	3	67	25	97.6	8.72844	21	108.286	14.3541	21	91.7143	8.63157
MYDGF	3	67	26	88.3462	7.34765	28	78.7143	6.77308	13	94.5385	13.277
PAFAH1B1	3	67	27	102.704	14.3134	17	97.8824	11.5881	23	105.826	10.0809
POLR2E	3	67	37	67.0811	4.9108	15	74.4	7.42835	15	90.0667	9.51138
PPP1CA	3	67	33	90.2424	7.08327	21	112.571	10.4737	13	102.538	11.0671
SERINC3	3	67	34	84.1765	5.71323	16	72.25	8.99588	17	67.9412	13.3752
SNRPA	3	67	26	88.9615	6.06827	25	118.84	13.3217	16	111.438	8.80694
WTAP	3	67	26	80	9.74118	27	75.9259	8.59593	14	91.4286	12.3109
AMZ2	3	66	26	84.3462	8.60988	21	90.8095	10.4236	19	111.368	13.6303
ARF5	3	66	34	89.7941	7.2112	14	79.6429	8.73102	18	103.722	14.1489
CDC5L	3	66	30	94.4333	9.66893	13	79.0769	8.06883	23	103	8.5173
CHPT1	3	66	27	63.2222	5.72203	19	80.8947	7.91817	20	114.65	15.0105
CLEC2D	3	66	21	100.238	12.8834	15	132.8	17.3861	30	143.733	9.10994
DARS	3	66	33	80.6061	8.38753	18	68.9444	9.66746	15	68.4	8.10092
DYNLL2	3	66	29	108.448	9.89836	13	123.692	13.7924	24	119.292	12.4408
GTF2H2	3	66	29	93.6552	9.36818	11	94.8182	16.4029	26	78.8077	9.15239
HMGN5	3	66	39	82.4872	6.90738	21	64.5238	7.29757	6	77.8333	15.8086
MRPL49	3	66	24	81.875	9.3293	19	99.9474	11.9518	23	106.739	9.79318
MRPS17	3	66	28	94.2857	8.67906	16	89.8125	10.3139	22	119.318	11.1512
MRPS35	3	66	26	86.4615	8.32303	22	106.955	9.75707	18	121.889	10.3593
MYL12B	3	66	26	97.1538	11.3493	19	95.2105	12.7878	21	103.762	11.2914
NDUFV1	3	66	30	97.6667	10.209	19	113.105	12.9156	17	149.059	17.7098
PRPF8	3	66	39	98.2564	9.29159	11	91	8.90352	16	114.688	17.5294
RIOK1	3	66	18	108.833	15.7237	15	88.3333	12.7599	33	100.333	7.50362
SMIM26	3	66	20	77.95	9.14808	17	110.353	10.6322	29	124.379	11.6751
UBE2J2	3	66	19	88.3684	9.29427	20	121	17.5922	27	109.519	9.15877
UCK2	3	66	20	87.05	11.781	26	91.0385	7.16902	20	99.55	10.2004
ZNF664	3	66	37	108.946	9.17256	20	110.1	10.57	9	117.333	18.0842
ATP6V1D	3	65	32	78.0938	6.06562	12	71.1667	10.4409	21	90.2381	7.8153
CBWD5	3	65	31	93.8065	9.01916	15	73.8	5.73271	19	85.2105	10.3511
CDKN3	3	65	36	80.25	7.36015	17	82.8824	8.9913	12	64.0833	11.3996
DPM1	3	65	25	82.76	7.74995	18	92.7778	10.1779	22	113.182	9.75752
EIF4EBP1	3	65	32	84.7812	5.97745	20	92.25	9.2919	13	89.6154	10.4827
GNB1	3	65	32	104.188	8.68519	19	112.421	11.5308	14	88.3571	11.0165
KHSRP	3	65	28	87.1429	6.84722	20	117.75	16.0228	17	119.647	15.9526
KIF1BP	3	65	15	78.4667	10.1012	23	104.13	10.9365	27	108.667	10.1513
PPIL1	3	65	30	106.5	10.6682	14	92.2857	12.3909	21	91.1905	10.7422
PRDM4	3	65	15	102.133	12.7122	11	108.818	20.5039	39	118.462	7.95995
SF3B3	3	65	30	110.533	6.86711	17	92.7059	7.66638	18	99.8333	9.3119
TCOF1	3	65	28	107.571	11.7099	15	111.6	16.7448	22	110.955	10.2551
THOC7	3	65	29	68.4828	7.28078	17	91.7647	7.36706	19	90.4737	8.49421
TRIM28	3	65	30	96.3667	9.4424	17	113.059	12.5026	18	108.389	12.1838
AC009133.1	3	64	18	100.944	13.1338	25	99.68	9.77797	21	93.4286	13.1146
ACTL6A	3	64	25	91.52	8.52143	19	89.0526	9.07173	20	109.85	15.6707
ARL6IP5	3	64	31	73.3548	6.95452	21	89.1429	8.79014	12	60.9167	8.14748
ASF1A	3	64	24	83.6667	9.43668	18	69.1111	6.85876	22	89.8182	9.72932
BRD7	3	64	30	85.9667	8.56848	14	98.3571	11.3095	20	101.3	10.7467
C19orf70	3	64	39	81.641	6.69565	13	84.0769	7.81628	12	83.4167	14.4123
CHMP2B	3	64	30	89.6	11.3326	14	73.8571	8.53675	20	59.8	9.76642
DUS1L	3	64	28	117.679	12.358	17	97.8235	16.7012	19	86	10.28
ETF1	3	64	29	95.0345	8.24354	19	109.526	10.6241	16	112.188	12.5693
GAR1	3	64	23	80.8261	8.63668	20	96.85	9.07752	21	126.571	13.4611
GNG5	3	64	28	87.2857	7.45323	18	100.111	8.80127	18	105.389	8.42583
KRT18	3	64	30	78.8333	5.80595	11	98.8182	14.2995	23	102.783	12.622
MAPK1IP1L	3	64	19	92.5789	11.0244	24	74.75	7.53792	21	127.143	11.2206
NDUFA10	3	64	32	85.5312	7.44393	16	86.875	9.04886	16	107.312	12.3863
POLR2H	3	64	30	90.5667	6.6909	16	85.125	12.7906	18	106.556	13.6004
PSMG3	3	64	30	85.1333	10.7543	17	116.118	12.6055	17	101.941	13.5444
SFSWAP	3	64	31	95.5806	10.5754	14	89.7857	16.3505	19	118.789	14.562
SFXN1	3	64	26	128.577	12.0155	16	116.688	14.2277	22	122.864	14.3801
SMC1A	3	64	29	120.379	9.48613	16	106.625	7.65153	19	127.421	10.6686
SNX2	3	64	18	88.3889	10.7425	27	105.889	9.38454	19	105.316	7.47963
STT3A	3	64	26	110.846	9.17591	21	96.2381	8.8194	17	124.588	14.353
UBAC1	3	64	26	75.5385	6.50335	15	113.2	13.7983	23	91.7391	9.2602
UBL5	3	64	33	114.394	8.97777	16	116.688	12.2789	15	112.933	10.5318
ZPR1	3	64	23	87.6522	8.69665	12	82	8.69866	29	89.4828	8.02221
AAMDC	3	63	34	80.5882	7.54458	16	99.5625	10.2857	13	129.462	15.2489
AIFM1	3	63	23	99.3478	9.05113	24	112.167	12.9909	16	89.8125	8.21404
ANXA11	3	63	24	87.5	8.30662	15	95.2667	9.42642	24	103.625	13.1459
ASNA1	3	63	26	81.7692	5.80535	17	85.2941	6.28821	20	87.55	11.3551
CCNC	3	63	24	81.375	9.92643	15	94.4	7.85525	24	91.875	10.795
DAD1	3	63	22	80.4091	7.45667	20	85.05	7.00588	21	121.476	14.1952
DDX54	3	63	21	91.8095	9.32327	20	99	10.4747	22	113.545	11.727
DEK	3	63	28	69.3571	7.33182	18	68.4444	9.80181	17	95.8235	11.5361
DERL1	3	63	28	83.7857	10.3345	11	73.5455	11.48	24	78.9583	9.13792
DYNLRB1	3	63	25	101.36	9.35981	22	91.2727	7.75161	16	115.812	15.1251
EIF2B3	3	63	26	81.8846	6.9806	20	101.1	12.3063	17	99.8235	14.0085
JAGN1	3	63	24	94.1667	8.40297	18	107.722	11.4756	21	96.0952	11.8918
MED10	3	63	20	82.35	8.73907	19	99	9.96504	24	102	8.43624
MRPL11	3	63	35	83.3429	6.97517	10	96.8	15.2544	18	106.222	14.2981
MRPL16	3	63	20	112.05	12.3686	22	108.682	8.07976	21	144.619	14.7309
MTDH	3	63	30	99.8667	9.73444	11	104.818	14.0488	22	86.0455	13.634
POLD2	3	63	31	83	9.30834	18	82.8889	9.11209	14	87.7143	9.06126
POLR1D	3	63	29	83.2414	7.76707	20	109.9	12.654	14	116.429	12.2277
TUBB6	3	63	23	92.2609	11.0786	20	91.1	7.00246	20	104.3	11.8904
ALYREF	3	62	26	100.269	8.96996	21	101.952	8.50356	15	113.6	10.4136
CAPZA1	3	62	26	96.3077	10.4755	13	98.5385	10.0635	23	115.739	10.2522
CBWD3	3	62	36	91.4167	9.70573	15	71.7333	11.1201	11	97.3636	19.7498
CCDC50	3	62	18	88.3889	12.3768	12	102	12.6398	32	92.5312	8.53199
CDK16	3	62	30	77.3667	6.94846	15	95.3333	13.2359	17	128.059	14.9515
GNAI3	3	62	26	87.3077	10.1052	20	88.9	10.6515	16	100.188	8.86144
HNRNPA0	3	62	18	137.5	13.7738	19	114.526	16.7197	25	131.4	15.7329
JADE1	3	62	37	55.6757	7.13074	8	68	17.7333	17	99.5882	17.7446
MED6	3	62	26	84.7308	9.66565	20	75.9	9.2035	16	88.125	9.29208
MRPL2	3	62	19	84.1053	11.863	26	83.7308	7.68818	17	99.1765	13.6902
NDUFA2	3	62	32	90.8125	7.12054	18	97.7778	14.8998	12	129.333	15.4422
NDUFA7	3	62	27	100	10.0023	21	109.286	8.01561	14	106.929	14.9166
PGRMC1	3	62	21	86.6667	8.20716	22	82.9091	9.0064	19	103.421	14.0348
PSMD9	3	62	30	89.2	8.97842	16	84.8125	9.57667	16	118.312	13.0745
RAD51C	3	62	24	74.1667	6.2732	19	107.105	11.7265	19	107.474	16.5889
RSL24D1	3	62	29	94.1034	10.4555	14	62.7857	5.66062	19	81.8947	8.70536
SEC61A1	3	62	27	84.4815	7.83162	17	83.9412	8.43517	18	114.5	12.7495
SLC6A8	3	62	20	72.4	6.49938	21	94.2381	11.0845	21	81.2857	8.36935
SMIM10L1	3	62	24	84.2917	11.993	16	86.875	10.6949	22	121.682	13.9732
SON	3	62	28	131.429	10.205	16	117.375	17.1142	18	87.2778	9.91906
SSNA1	3	62	26	79	10.2887	20	94.55	11.6216	16	73.4375	7.17361
STX8	3	62	31	71.1613	7.52023	22	77	10.3061	9	69	8.2522
SUMO3	3	62	24	77.125	9.2292	19	68.8947	5.28988	19	109.263	10.6461
VKORC1	3	62	31	68.129	6.47154	15	74.7333	9.67033	16	114.688	13.6309
ZRANB2	3	62	24	91.625	11.5703	17	86.2353	14.8353	21	82.381	9.65187
ALDH9A1	3	61	27	91.0741	6.89047	18	89.9444	13.3674	16	102.688	12.1933
APTX	3	61	21	90	10.2003	14	122.857	15.5179	26	107.769	9.07127
BRK1	3	61	29	83.7586	6.86452	14	74.2143	7.71043	18	93.4444	8.51731
C16orf91	3	61	34	77.5	5.63652	17	81.3529	6.31576	10	83.6	11.2944
DCTPP1	3	61	25	81.88	5.72778	16	102.562	10.4676	20	108	11.7024
FRG1	3	61	29	92.8276	8.43624	15	81.7333	10.0521	17	95.9412	9.61849
GGCT	3	61	18	90.8889	11.2861	23	83	6.36418	20	110.85	14.3383
MND1	3	61	21	76.0476	6.56123	13	89.9231	13.4219	27	103.074	10.4115
ORC6	3	61	25	114.76	14.5242	18	99.1667	10.5694	18	139.333	12.0713
PERP	3	61	29	75	7.32935	12	89.8333	10.1611	20	108.3	14.4513
PFDN5	3	61	34	81.2059	5.18495	16	88.5625	9.11299	11	129.909	20.6867
PSIP1	3	61	31	96.3871	8.74814	16	92.6875	8.81437	14	112.5	15.3123
RAD23A	3	61	35	78.8857	7.99896	14	88.2143	11.655	12	78.4167	15.4585
SMARCC1	3	61	26	89.8077	5.93805	11	101.455	11.6253	24	101.875	11.8222
TEX264	3	61	23	85.9565	9.72446	26	86.1154	6.83671	12	99.1667	15.8148
UTP6	3	61	28	84	9.01897	20	113.8	14.8899	13	76.4615	6.73647
WDR77	3	61	29	91.9655	6.76433	17	103.588	11.9509	15	116.867	14.1229
ACP1	3	60	25	95.44	8.13744	19	96.3158	11.8514	16	97.125	11.8993
AP3S1	3	60	28	90.9286	8.57558	11	87.1818	16.2134	21	97.5238	10.7278
BTF3L4	3	60	22	72.7273	6.10655	17	99.1765	11.4009	21	105.952	9.23085
DDX49	3	60	23	85.913	7.14392	17	106.118	8.41686	20	93.5	10.3195
EFTUD2	3	60	31	79.2581	5.86298	14	106.786	14.4562	15	96.8	8.43969
H2AFX	3	60	28	91.75	7.14225	15	122.667	15.204	17	101.353	11.3808
HMGA1	3	60	30	90.2333	7.40896	16	92.5625	8.03215	14	114.929	16.9153
MCM3	3	60	27	89	7.12133	17	108.294	12.1196	16	124.5	13.3516
NIT2	3	60	21	69.2381	7.31411	21	77.2381	10.5645	18	108.833	15.5429
PEX11B	3	60	21	98.619	11.6486	13	102.615	14.0778	26	116.038	14.4175
POLR2B	3	60	25	106.68	8.51478	12	101.25	12.4745	23	107.304	12.4748
SNRNP48	3	60	23	101.435	13.8809	20	83.25	9.42493	17	61.8235	12.1585
SQSTM1	3	60	15	81.0667	8.79215	19	103.526	10.7961	26	134.154	13.054
SRP72	3	60	19	83.7368	10.1115	21	99.1905	7.33754	20	85.3	9.05569
SRSF10	3	60	29	86.3448	7.35644	12	100.083	21.7142	19	113.211	14.0564
TDP2	3	60	22	105	12.8583	15	73.9333	7.45205	23	95.4783	7.86317
TMEM123	3	60	19	82.2632	8.57873	23	76.0435	9.3656	18	91.9444	11.246
TUBB2A	3	60	28	68.75	4.9971	15	112.6	12.5983	17	104.765	10.7096
ABCE1	3	59	21	111.81	14.5967	13	85.1538	7.53049	25	120.8	14.1163
AC011603.2	3	59	10	129.8	14.5016	24	134.125	9.17846	25	139.08	9.18989
AGPAT2	3	59	25	91.44	8.79292	11	77.7273	7.4624	23	92.6522	10.8076
BMS1	3	59	32	96.9062	8.69102	15	123.067	16.9216	12	91.4167	11.6913
CD2BP2	3	59	18	82	8.84084	13	114	14.059	28	115.036	9.23661
CD47	3	59	25	87.2	8.70935	18	89.3333	6.09999	16	122.688	16.7278
CLK1	3	59	22	123.864	18.0732	11	108.818	18.3663	26	96.6923	9.78221
CYB5R3	3	59	26	101.538	10.6784	19	96.3158	13.2387	14	93.9286	15.1864
HSPB1	3	59	24	118.833	10.7491	15	83.6	10.9706	20	126.35	14.4806
HTATIP2	3	59	11	82.5455	13.1478	14	96.5	14.307	34	101.382	9.5858
ID3	3	59	26	92.1538	7.72928	12	85.8333	10.3802	21	103.333	7.93835
IRAK1	3	59	31	98.4516	7.64915	16	92.375	10.8217	12	101.75	10.5047
MRPS30	3	59	18	79.6111	7.02515	21	86.381	10.6037	20	100.15	10.5668
NCBP2-AS2	3	59	18	95.7778	12.2677	22	102.5	10.9282	19	104.526	12.8508
NDUFA6	3	59	21	103.286	10.0642	15	105.533	12.3845	23	103.783	9.74533
NGDN	3	59	25	97.04	11.232	11	86.4545	15.0175	23	104.957	12.2132
OXA1L	3	59	25	105.84	15.7334	17	121.588	12.4564	17	133.941	15.7294
PAF1	3	59	25	74.52	6.18414	21	88.4286	8.75688	13	103.462	12.6471
PCBD1	3	59	26	91.6923	7.86701	19	84.2105	9.10529	14	96.2857	7.73306
PMPCA	3	59	18	115.722	11.8595	21	96.9048	10.8759	20	104.9	12.278
PPP5C	3	59	26	95.6923	8.04826	17	100.706	9.51297	16	81.1875	9.81557
PSMG2	3	59	28	86	11.3965	11	106.364	13.8804	20	79.5	7.00732
RNASEH2A	3	59	32	71.1562	5.73625	14	89.2143	7.80906	13	115.154	14.2034
RPP25L	3	59	28	75.8571	7.36974	16	85.875	9.14761	15	90.2	10.1159
SAR1B	3	59	31	81.8387	8.74082	17	84.4118	11.3003	11	89.1818	15.3842
SEC13	3	59	21	74.2381	6.20105	20	92.35	10.1858	18	92.0556	12.1
SKA2	3	59	28	94.0357	8.83544	12	89.5833	9.73286	19	100.263	12.5163
SLBP	3	59	22	97.3182	10.3346	12	94.1667	15.2902	25	101.68	7.71403
SLC25A1	3	59	35	84.7429	7.82558	12	87.0833	11.1302	12	121.583	16.3959
SPRYD4	3	59	16	82.125	13.8383	16	71.75	5.60517	27	77.3333	4.89282
SRP68	3	59	24	74.8333	6.40032	16	92.9375	10.794	19	103.737	9.71216
SYPL1	3	59	25	86.8	7.19044	19	73.1053	10.8551	15	76.8667	12.5375
TERF2IP	3	59	18	80.8333	9.85677	11	133.455	13.1692	30	107.133	9.0883
TMBIM4	3	59	33	72.5455	5.16471	12	84.5833	13.0163	14	100.286	16.0698
TMSB4X	3	59	27	91.3704	7.31613	23	98.8696	11.8055	9	85.6667	16.6504
URI1	3	59	30	88.3333	6.68603	9	65.5556	8.13332	20	100.1	12.9221
VPS25	3	59	27	77.4444	9.11899	19	71.7368	8.41738	13	91.8462	9.60636
WRB	3	59	32	92.25	7.92432	16	83.75	9.5723	11	101.636	18.9232
AC093323.1	3	58	13	129.308	12.317	17	110.824	9.15806	28	118.036	10.535
CCNA2	3	58	23	93.6522	10.3848	18	106.111	10.6926	17	116.647	13.6146
CTSL	3	58	28	80.5714	7.74999	16	127.188	14.3555	14	66.5	6.69964
DDX3X	3	58	23	120.087	13.8873	11	108.818	12.3836	24	85.7917	13.0436
DFFA	3	58	23	75.8261	8.88333	16	95.625	11.7203	19	116.263	10.8083
DHX15	3	58	24	92.5	11.8137	18	106	9.2583	16	95.625	13.1983
GADD45A	3	58	24	92.75	9.90988	13	109.308	15.272	21	123.048	11.9867
GNPNAT1	3	58	24	103.667	10.5739	10	74.9	9.14489	24	102.375	10.1731
HNRNPUL1	3	58	30	92.4333	7.7687	11	83.3636	12.2436	17	101.176	10.0488
LSM12	3	58	23	103.783	11.8392	15	107.467	13.5154	20	86.45	14.2193
MARK3	3	58	18	113.444	12.8443	15	130.267	13.3158	25	110.96	13.9553
MCCC2	3	58	23	99.0435	9.6305	20	94.35	8.38966	15	84.5333	16.5467
MRPL13	3	58	27	87.1111	8.12561	13	80.6154	8.78106	18	95.1111	10.6432
MRPL58	3	58	17	73.9412	7.31566	16	69.125	12.1059	25	97.92	9.57228
MTHFD1	3	58	24	88.25	10.6212	18	85.3333	8.53424	16	130.125	16.8731
MTHFS	3	58	30	70.5667	8.2158	11	59.6364	8.78793	17	96	12.8717
NAPA	3	58	32	78.375	6.02157	15	99.0667	11.3045	11	86.4545	9.58077
NDFIP2	3	58	25	95.48	9.13457	14	95.1429	9.56495	19	96.5263	8.32024
NEUROD2	3	58	12	76.5	12.7554	20	75.2	7.96856	26	63.8846	5.89186
PAPOLA	3	58	25	88.64	7.38558	16	105.625	17.143	17	99.8824	15.6446
PCMT1	3	58	24	62.4167	5.92573	13	83.3077	7.4169	21	85.9048	10.8042
PDSS1	3	58	26	92.1538	9.85917	19	102.211	10.0372	13	124.077	20.2252
PSMD10	3	58	28	76.8929	7.49308	15	87.0667	7.56099	15	90.6	8.99768
UTP14A	3	58	22	86.7273	11.2105	13	94.8462	10.6781	23	88.2174	6.65798
YIPF4	3	58	17	82.0588	8.33655	24	100.958	9.60983	17	95.8824	9.39627
AK6	3	57	27	91.6296	9.15379	7	90.4286	20.3458	23	108.261	11.0194
C2orf74	3	57	28	66.3214	5.49584	16	120.625	12.5999	13	100	10.2645
CFAP20	3	57	23	76.5652	6.73642	15	96.2	12.3087	19	123.895	13.4991
DDB1	3	57	29	102.552	7.57391	15	102.133	11.879	13	107.692	18.5799
DDX1	3	57	30	81.3	7.65509	12	77.5	7.62534	15	97.3333	14.4387
ELOVL5	3	57	20	82.9	10.2859	20	97	10.4831	17	106.235	18.6281
ERI3	3	57	26	83.7308	6.35479	15	76.3333	9.30695	16	97.25	12.3764
FAM49B	3	57	32	84.6562	7.20577	10	78.4	10.651	15	85.8667	11.6538
FUBP1	3	57	14	133.929	18.0511	20	135.55	15.6046	23	146.609	14.4275
GEMIN2	3	57	23	94.5217	9.60424	13	89.1538	10.1497	21	88.2381	7.03922
GNB2	3	57	26	95.6154	7.59478	25	93.6	8.54803	6	79.6667	15.7598
LMAN1	3	57	27	96.8519	8.4182	15	97.0667	9.61317	15	104.4	13.1473
LSM6	3	57	21	64.0476	5.84202	15	96.4667	8.39622	21	118.619	10.3098
MPLKIP	3	57	22	94.5909	8.56759	14	91.7143	10.2118	21	120.905	12.8909
POLR2J	3	57	20	101.3	12.5816	16	96.125	12.633	21	95.9524	9.25856
RBMX2	3	57	22	76.7273	8.98741	15	87.9333	15.0328	20	98.45	11.399
SNX6	3	57	30	85.4667	6.32627	11	78.5455	9.06302	16	89.1875	8.56648
STAU1	3	57	18	120.333	17.601	15	86.3333	6.93696	24	128.25	10.9024
UPF3B	3	57	19	112.526	14.0652	15	90.9333	12.6535	23	107.304	11.8594
YTHDC1	3	57	28	108.75	9.12102	12	115.667	12.1245	17	122.765	13.8959
ACIN1	3	56	18	107.667	18.9559	21	118.667	11.8441	17	106.471	13.5899
AIMP2	3	56	31	84.3548	6.60756	12	99	13.1032	13	102	14.1166
AURKA	3	56	24	73.125	6.29024	14	90.0714	10.4077	18	97.0556	9.25212
BRMS1	3	56	26	82.5	7.18052	16	90.5625	9.51724	14	75.7857	8.22526
COPS8	3	56	28	74	6.32032	9	76	8.72771	19	98.4211	8.80673
DAXX	3	56	17	100.118	12.8991	17	119.882	16.8642	22	103.455	9.37659
DBN1	3	56	33	92.3636	8.20779	12	94	5.69356	11	102.818	17.0312
DHCR7	3	56	23	85.6957	8.73782	22	85.2727	6.48303	11	89.2727	12.5574
GLRX5	3	56	24	90.75	9.08319	21	91.0476	9.74888	11	106.545	18.8405
GSS	3	56	25	85.24	7.66045	17	82.2941	7.91816	14	121.429	16.5821
HMGB3	3	56	24	96.75	8.65629	11	102.455	13.3586	21	103.762	8.80165
LRRC41	3	56	21	106.667	9.63067	10	100.8	12.1547	25	128.32	13.6914
MRPL23	3	56	29	80.6552	7.92568	12	99.6667	14.6327	15	132	15.6722
NARF	3	56	23	80.3913	8.28001	10	85.9	10.5209	23	81.7391	6.16019
NDUFA12	3	56	27	84.3333	7.62441	13	104.538	13.5138	16	86.375	13.5251
NOLC1	3	56	21	112.571	10.042	17	92.6471	12.754	18	100.833	13.7662
PRMT2	3	56	16	93.6875	9.37655	19	86.9474	8.64199	21	112.524	11.445
RPLP2	3	56	30	117.7	7.88348	13	101.538	9.57661	13	138.538	17.1028
SCFD1	3	56	29	96.8621	8.1557	14	89.1429	11.4868	13	144.538	19.8735
SCYL1	3	56	20	74.65	13.1155	20	91.2	12.3785	16	117	16.2404
TRIAP1	3	56	18	72.1111	10.9347	22	79.2273	8.67311	16	107.812	12.0805
TWF2	3	56	30	84.9	7.62632	17	76.7647	5.8283	9	82.6667	9.98641
UBA2	3	56	29	95.2414	5.70054	11	111.273	12.9686	16	93.875	13.0396
USB1	3	56	27	78.9259	6.73849	11	97.4545	11.8666	18	82.7778	10.7991
ZCRB1	3	56	25	79.2	7.82938	20	67.1	8.77152	11	109.636	12.0531
AARS	3	55	31	92.6129	8.18843	18	111	8.36476	6	87.1667	12.0978
AL138752.2	3	55	27	94.8148	8.53847	20	82	8.44808	8	88.25	14.1209
ANP32E	3	55	20	105.75	11.5687	21	77.8571	9.56616	14	100.214	9.26546
C6orf48	3	55	31	88.2258	10.8479	15	91.2667	11.4195	9	117.222	23.4467
C9orf78	3	55	20	74.4	7.0251	15	72.7333	7.80112	20	77	8.27406
DBNL	3	55	25	78.52	3.92046	15	102	10.1052	15	119.267	20.0345
DERL2	3	55	30	92.3667	7.85514	12	85.4167	10.1341	13	95	11.9812
DPH5	3	55	25	77.32	6.28693	18	94.5556	13.9222	12	83.5	12.1607
EIF3F	3	55	27	66.4444	5.81761	14	81.4286	8.32363	14	80.3571	12.8065
FBXO7	3	55	19	99.3158	11.2543	10	89.5	9.11619	26	86.5769	9.1487
FOXRED2	3	55	24	100.375	8.64698	10	85.4	10.5434	21	120.524	8.9457
HIGD2A	3	55	14	95.8571	15.8191	21	93.2381	10.5189	20	143.15	12.0425
IARS	3	55	24	89.125	7.52226	17	132.647	23.6686	14	115.286	15.5719
ILF3	3	55	30	102.833	8.29057	12	96.9167	11.1033	13	116.231	10.4605
LIMK2	3	55	16	88.625	10.919	22	108.409	6.96231	17	118.765	10.2405
MEAF6	3	55	17	95.5882	14.7735	22	103.409	9.42185	16	99.4375	12.8553
MRPL47	3	55	25	78	7.57491	18	77.3333	8.38687	12	95.3333	13.1821
MRPL57	3	55	29	102.759	10.7727	13	129.615	13.6804	13	151.538	18.5631
MTIF2	3	55	24	105.958	10.0708	15	92.2	11.4275	16	111.938	18.1516
NARS	3	55	23	88.5652	10.3286	15	81.8667	8.47316	17	86	9.27436
NDUFA9	3	55	24	85.25	10.9402	15	95.9333	12.0109	16	89.1875	9.93464
NORAD	3	55	14	113.429	12.769	14	92.9286	16.4947	27	115.667	8.87066
OTUB1	3	55	25	97.56	10.512	10	77.5	9.98023	20	89.95	6.11411
P3H4	3	55	23	83.913	7.88934	17	95.3529	9.60246	15	124.267	13.9078
PES1	3	55	25	110.52	10.1647	15	97.4667	14.584	15	100.333	11.458
PIH1D1	3	55	29	92	11.862	9	78.8889	9.99561	17	91.4706	9.09584
PSMD12	3	55	20	96.6	9.9961	17	80.9412	10.4509	18	129.444	24.0085
S100A10	3	55	21	100.238	8.10305	15	128.533	12.6181	19	109.526	10.4432
SDCBP	3	55	20	92.1	11.0955	12	91.4167	10.8208	23	100.217	10.9531
SHB	3	55	15	118.533	12.7307	13	87	7.86348	27	103.148	7.68404
SKP2	3	55	29	106.862	8.9876	12	104.167	14.6562	14	101.786	9.51539
TBCE	3	55	25	102.88	11.1594	15	78.9333	7.48003	15	124.267	20.0718
TM2D3	3	55	21	93.4286	11.664	5	60.8	8.007	29	105.414	10.9496
TOMM5	3	55	27	84.8519	10.2686	14	109.214	16.8493	14	136.714	21.0355
TOP2A	3	55	32	115.031	9.19839	11	74.9091	13.8453	12	132.917	20.2157
TXNDC5	3	55	15	115.867	10.0959	25	91.64	5.98689	15	93.7333	9.29682
U2SURP	3	55	24	108.167	12.0636	10	111.4	23.4641	21	115.762	14.0788
UBE2F	3	55	20	93.45	11.5757	16	88.375	8.10713	19	121.947	17.0569
UBXN1	3	55	20	70.1	7.06856	20	107.2	12.3527	15	98.2	12.5932
UROD	3	55	24	82.6667	8.46432	16	67.1875	9.49186	15	139.733	17.3913
UTP3	3	55	21	85	9.12921	13	117.077	15.4263	21	88.9048	9.19206
ARHGDIA	3	54	16	88.0625	7.9365	19	112.263	11.7974	19	103.421	11.209
ATP5J2	3	54	19	112.316	10.5255	20	113.15	11.2277	15	118.467	14.4286
ATP6V0E1	3	54	24	88.5417	8.5647	11	89	12.0028	19	97.7368	8.20744
C14orf166	3	54	29	86.1379	8.47669	10	72.2	11.2515	15	93.3333	11.8594
CFAP36	3	54	28	84.4286	7.89818	14	60.2857	8.02383	12	103.75	12.4053
CKAP2	3	54	20	92.75	10.5157	14	85.7857	7.58098	20	104.7	9.77551
CKS1B	3	54	23	100.217	13.2333	13	84.8462	8.26832	18	115.278	13.9529
COX5B	3	54	20	105.95	8.78336	19	101.579	8.188	15	133.8	11.3847
CRIPT	3	54	18	79.4444	8.73415	14	88.3571	8.83442	22	92.5909	10.2952
CSNK2A1	3	54	23	84.2174	9.78869	14	81.1429	9.89736	17	99.7059	12.0371
DDX24	3	54	26	94.0385	6.68445	13	113.231	10.9896	15	110.867	14.6296
ECI2	3	54	19	86	10.0426	18	88.9444	8.05248	17	98.1765	11.1898
HADHB	3	54	23	103.261	8.62235	13	83.6923	9.54738	18	102.222	10.5203
HDGFL3	3	54	16	69.5	9.16686	11	92.2727	13.1181	27	82.1481	8.98081
HIRIP3	3	54	17	80.2941	7.51781	12	93.4167	12.5745	25	108.24	10.1659
LAS1L	3	54	30	90.6333	8.72983	14	83.6429	8.36209	10	102.8	9.16821
MAIP1	3	54	19	92.1579	6.85919	19	84.1579	9.65076	16	103.188	10.477
MAPK1	3	54	22	105.364	9.68546	10	111.7	18.216	22	108.182	8.63867
MCM5	3	54	16	86.375	9.61927	13	103.615	14.5381	25	106.08	9.38423
NDUFC1	3	54	19	81.9474	11.8192	20	110.8	10.2136	15	90.5333	14.2598
NIFK	3	54	23	89.1304	8.34767	10	89.8	9.17584	21	89.0952	8.54146
PHPT1	3	54	33	86.6061	7.55025	11	90.6364	15.1784	10	118.2	22.058
RRP1	3	54	14	91.5	10.7246	19	102.684	8.54159	21	106.524	11.6904
SFT2D1	3	54	19	87.3684	7.60274	17	77.3529	9.14661	18	125.556	16.3858
SLC25A39	3	54	29	82.8966	5.4442	13	111.769	17.4763	12	106.417	13.9873
SMYD2	3	54	27	96.2222	8.70194	13	87.8462	7.64125	14	117.143	11.3123
THYN1	3	54	27	84.963	7.75225	15	90.6667	13.2288	12	115.667	16.4064
TMED10	3	54	25	91.44	10.0035	12	94.5	17.2008	17	103.118	12.9133
TTC1	3	54	30	81.4	8.66944	9	64.2222	9.11894	15	96	12.8243
AATF	3	53	18	69.5	9.99452	11	74.0909	8.98341	24	103.75	10.9529
ARFIP2	3	53	23	92.913	10.8372	16	93.125	10.5973	14	105.143	15.5304
ARID4B	3	53	25	94.96	11.4043	17	93.7059	9.10977	11	74.8182	13.2408
BCL2L13	3	53	14	98.8571	12.3989	15	85.7333	9.58724	24	111.25	10.0477
BLVRA	3	53	28	100.536	8.70718	15	76.2	8.49638	10	73.9	11.2822
C15orf40	3	53	31	99.5484	9.83092	13	88.6154	9.57656	9	70.7778	10.8568
C8orf33	3	53	25	92.4	6.76911	13	77.6154	8.12516	15	108.133	10.4537
CALCOCO2	3	53	32	100.531	7.06637	11	78.5455	10.8988	10	94.6	11.1303
CD320	3	53	21	92.7619	11.0159	22	98.5909	10.7441	10	105.3	12.8492
CFDP1	3	53	27	71.5926	6.30745	13	66.8462	5.69423	13	94.5385	10.6124
CLIC1	3	53	22	95	11.6566	11	122	9.91618	20	106.3	10.6991
CMAS	3	53	16	88.125	12.7429	19	97.5263	11.9726	18	74.7222	9.06656
DNTTIP1	3	53	24	80.875	7.75231	18	107.722	12.1047	11	108.364	15.1757
FAM32A	3	53	22	82.0909	9.8209	15	91.8667	14.256	16	125.188	17.6428
FEN1	3	53	14	108.429	13.0637	15	109.133	13.3925	24	86.6667	8.32576
GLRX	3	53	21	75.3333	10.6026	17	85.8824	12.7211	15	107.933	18.3718
IFRD2	3	53	26	101.308	9.77389	18	108.222	8.07853	9	144.667	23.181
KDM5C	3	53	22	84.1818	8.23132	14	122	17.8903	17	119.118	16.2432
MAGOH	3	53	19	85.5263	10.5962	11	79.4545	15.7839	23	93.2174	10.0993
METTL26	3	53	15	127.333	18.6956	22	127.864	12.5092	16	115.25	13.3374
MRPL44	3	53	24	101.083	8.92152	16	111.125	11.3846	13	117.385	6.78716
MTCH2	3	53	17	75.6471	9.13828	24	107.333	9.33253	12	102.917	8.63653
NDUFB11	3	53	36	72.4167	6.1312	8	80.625	14.7351	9	116.444	10.6332
PDCD2L	3	53	22	74.2273	7.17374	15	80.1333	11.6053	16	108.062	8.975
PFDN1	3	53	22	72	6.9058	15	79.5333	10.4221	16	90.9375	9.60488
POLR2G	3	53	23	93.8261	8.74327	17	105.412	8.41241	13	122.692	14.0735
PPP2R2A	3	53	18	117.944	10.841	11	92.1818	11.6412	24	88.2083	8.95164
PSMA6	3	53	26	82.3077	7.78497	11	103.091	19.2999	16	119.25	13.9173
PSMD1	3	53	24	86.2083	9.76174	12	107	17.7193	17	101.588	15.0653
RNASEK	3	53	34	86.7647	6.63834	9	81.3333	11.5577	10	78.5	8.89073
RPLP0P2	3	53	13	75.9231	9.27519	20	92.55	11.0963	20	102.5	9.90391
SEPHS1	3	53	25	98.84	8.33166	15	112.467	12.445	13	123.769	17.5837
TARS2	3	53	26	76.3462	7.81516	11	115.909	19.0855	16	101.125	18.7695
TIPIN	3	53	16	82.375	7.82717	14	92.0714	15.4723	23	106.652	10.2742
TRIR	3	53	23	71.4348	7.68123	19	76.9474	6.46082	11	89.5455	14.8449
TUBA1A	3	53	25	91.8	7.5183	17	98.7059	10.5094	11	83.7273	12.2144
UBE2V2	3	53	27	78.7037	9.30062	14	71.1429	8.44663	12	97.5833	14.4609
AHCY	3	52	18	82.7222	6.53377	14	87.7143	14.8672	20	87.55	6.85656
CHEK1	3	52	20	70.6	13.7004	14	106.643	12.2934	18	94.6111	11.6243
EIF2S3	3	52	28	103.571	8.16842	13	92	13.7053	11	119	18.3452
FH	3	52	18	77.8333	7.61344	20	98.6	8.87282	14	88.0714	13.8319
GSTM2	3	52	18	89	8.62239	18	96	6.61414	16	94.4375	9.50821
HNRNPF	3	52	24	84.4167	8.11654	10	81.3	11.6868	18	95.6111	6.97001
MAP2K2	3	52	27	74.6667	8.20034	10	78.1	10.0623	15	88.1333	11.7143
MIS12	3	52	21	110.143	14.1014	14	81.5714	10.5355	17	111.471	13.6793
MRPL17	3	52	21	57.7143	5.131	8	78.5	11.844	23	103.478	14.2824
MRPL42	3	52	22	89.1364	10.9656	12	118.667	17.7468	18	96.2778	11.003
NDUFS6	3	52	12	116	15.3835	16	96.125	13.2473	24	118.458	9.35859
NRAS	3	52	25	80.52	9.07006	12	84.3333	14.5585	15	116.533	15.781
PNRC2	3	52	20	89.65	11.5852	11	62	12.0364	21	105.476	13.6097
PRPF38B	3	52	22	80	10.0031	14	92.3571	16.4728	16	67.1875	13.531
PYCR2	3	52	24	83.375	8.58188	15	79.7333	8.2841	13	92.1538	11.163
RDX	3	52	19	125.105	6.85137	13	116.077	9.98547	20	126.4	12.1531
RNF7	3	52	21	75.9524	6.91033	18	94.6667	12.4263	13	118.231	17.7238
SAR1A	3	52	30	105.967	10.6166	10	90.3	19.3938	12	111.083	15.1925
SEC22C	3	52	21	85.5238	9.33858	13	91.9231	6.12248	18	96.7778	10.9695
SLC50A1	3	52	27	115.63	10.3872	15	97.7333	9.27192	10	115	29.1239
SNAP29	3	52	21	89.1905	11.4037	8	114.625	19.3285	23	112.043	7.38938
TCEAL1	3	52	17	90.1765	12.7706	19	80.6842	7.92662	16	97.375	13.3647
TMEM208	3	52	25	66.24	7.2783	17	103.588	16.7324	10	91	17.7775
ACADVL	3	51	24	91.875	10.0202	15	97.7333	11.3449	12	129	34.1351
ADRM1	3	51	16	106.75	14.721	13	84.0769	9.22209	22	123.364	12.3776
BRIX1	3	51	25	85.2	7.88193	9	104.111	14.9563	17	92.2353	8.66067
CDC37	3	51	33	78.0909	5.65886	10	101.2	17.4721	8	70.25	7.06609
COMMD4	3	51	26	83.3846	9.04216	16	99.625	8.49029	9	97.2222	12.6772
CRYZL1	3	51	23	60.5217	5.80133	17	83.7647	9.55209	11	105.909	26.573
CYP51A1	3	51	20	91.5	7.54536	14	74.0714	8.47172	17	105.235	10.2084
ELAVL1	3	51	22	109.318	9.29218	15	83	8.38411	14	140.929	10.9136
EXOSC1	3	51	24	67.9167	7.39015	15	88.1333	10.1214	12	122.333	21.5846
FARSB	3	51	19	102.105	17.6961	11	114.091	18.4326	21	119.714	11.0972
HIF1A	3	51	20	90.85	9.71372	19	76.7895	10.2901	12	112	13.5928
HOXA9	3	51	26	119.462	13.5985	9	110.778	12.7083	16	122.688	14.1774
MIEF1	3	51	20	86.5	8.11311	13	90.7692	15.0448	18	118.889	10.1224
MLST8	3	51	24	82.5	9.13536	13	79.6154	10.2233	14	80.8571	12.5315
NAA50	3	51	27	89.2593	8.34552	10	88.5	12.0435	14	134.071	20.0406
NAP1L4	3	51	21	86.8095	8.24721	14	108	10.492	16	97.75	11.192
NUSAP1	3	51	22	72.3182	8.72239	15	88.4	11.9424	14	113.5	14.5573
PLEKHJ1	3	51	17	106.294	7.05822	21	90.4762	8.62145	13	120.615	16.2249
PNP	3	51	16	70.0625	6.87186	17	96.6471	10.5656	18	86.1111	13.6937
PSME1	3	51	30	106.6	9.28363	15	91.8	8.54489	6	107.333	21.0062
RBBP6	3	51	20	117.6	13.5623	13	105.308	13.8099	18	74.3889	12.0915
RNF34	3	51	18	81.6111	9.07994	15	91.8	9.07705	18	97.1111	11.0154
RPL28	3	51	30	86.7333	7.91327	10	73.2	15.6747	11	120.364	16.1185
SF3A1	3	51	15	93.5333	10.9771	16	92.625	13.3507	20	121.85	15.5766
SMC4	3	51	21	99.8571	15.0484	11	98.2727	16.5774	19	121.421	14.2581
SYNGR2	3	51	25	77.08	9.13611	14	79.2857	12.2293	12	93.9167	14.6389
TMEM109	3	51	21	73.7143	4.41454	16	90.1875	10.4265	14	89.2143	10.4022
TMEM59	3	51	23	79.5652	10.003	13	93.4615	12.4557	15	79.3333	12.7128
UBL7	3	51	26	77.8077	6.72231	14	65.3571	6.33472	11	77.9091	8.29762
ZNF146	3	51	21	88.8095	11.5826	10	64.5	12.7336	20	90.85	11.4606
ABRACL	3	50	27	82.0741	9.08864	10	74.7	14.0264	13	99.6154	14.5071
AKIRIN2	3	50	17	81.4118	11.3981	12	77.6667	11.2153	21	123	11.1983
ANXA2	3	50	21	103.905	9.20143	17	103.059	7.95292	12	146	15.3175
CENPF	3	50	17	106.765	12.1549	16	109.25	16.4113	17	93.8824	11.6286
CENPN	3	50	24	71.0833	8.06116	12	79.5	10.0481	14	92.6429	10.8814
CFL2	3	50	17	81.7647	14.1875	18	89.4444	11.3614	15	120.6	11.8602
GOLGA7	3	50	9	93.5556	15.7222	19	112	9.47719	22	117.318	11.9884
IFT46	3	50	16	77.9375	7.09669	13	98.5385	8.99416	21	104.429	10.8422
ITGB1BP1	3	50	23	67.3043	8.29249	15	82.9333	15.6334	12	80.4167	18.405
JUN	3	50	18	95.9444	10.2772	9	98.1111	14.8236	23	115.478	13.5513
KRI1	3	50	19	109	14.9394	16	93.4375	12.2235	15	111.067	17.0462
MYC	3	50	18	98.8889	12.8685	12	100.667	12.7046	20	117.4	13.5787
NDUFS1	3	50	19	95.9474	14.2412	13	89.4615	11.8968	18	141.889	14.417
PHF5A	3	50	11	71.5455	12.9916	15	70.2667	6.67297	24	99.2917	11.3119
PPIG	3	50	24	102.167	13.0338	11	96.5455	10.6936	15	81.4	10.7591
RNF25	3	50	24	82.0417	9.08667	15	95.8667	11.5612	11	76.2727	6.97349
RPP30	3	50	17	85.1176	9.55439	15	93.6667	9.70254	18	102.944	12.1326
SDCCAG3	3	50	22	98.0455	12.7813	16	117.062	13.6188	12	129.333	23.1635
SMIM7	3	50	27	77.8519	7.81748	8	83.375	18.6354	15	90.8	11.3979
TIMM22	3	50	19	83.2632	9.66756	11	83.0909	8.12247	20	108.4	9.97056
TMEM101	3	50	17	89.9412	11.7062	14	97.6429	11.1074	19	108.737	15.5198
USF2	3	50	28	91.3214	7.57598	13	91.6154	10.3492	9	95.1111	19.4368
WASF1	3	50	22	89.2273	10.6085	14	122.5	15.8706	14	109.357	20.0748
YME1L1	3	50	27	89.3704	9.32144	8	94.625	10.2285	15	91.8	13.4254
ZC3H14	3	50	21	110.905	12.4605	11	108.273	7.30005	18	114.556	14.0311
AC106795.1	3	49	10	88.1	12.0942	15	109.533	9.47505	24	85.75	9.63163
ACOT7	3	49	26	86.0385	8.46337	12	102.917	10.8605	11	126.273	16.0439
ATP2A2	3	49	14	106.429	18.0135	18	119.833	11.0714	17	135.824	11.5514
C11orf74	3	49	18	73.3889	8.26085	13	68	8.50339	18	109.5	13.2479
CAPNS1	3	49	31	87.2258	7.52197	11	93.3636	11.5331	7	170.286	16.445
CCDC25	3	49	20	73.45	7.75999	14	112.357	13.7357	15	90.6	12.8232
CCM2	3	49	17	78.7059	11.3142	17	77.6471	8.3963	15	91.6	8.41628
CD151	3	49	22	114.909	14.6304	12	70.9167	6.75818	15	92	11.6367
CDCA5	3	49	16	92.6875	11.9451	14	105.786	11.4054	19	106.684	14.6484
ESD	3	49	22	94.1818	9.47978	13	96.1538	11.7744	14	101.357	13.6287
EXOSC3	3	49	20	75.45	8.22997	12	96	9.92682	17	118.059	12.1856
GANAB	3	49	22	116.455	9.54994	15	93.4	12.7627	12	125.75	17.975
GTF2F2	3	49	20	81.1	9.37574	11	91.8182	13.5919	18	105.111	7.99803
HADH	3	49	20	104.05	11.0992	15	90.2667	9.30064	14	111.643	16.5978
HCCS	3	49	14	104.929	16.5666	14	120.929	10.4278	21	125.524	12.314
ISYNA1	3	49	27	123.556	13.4922	14	106.429	8.80498	8	124.125	20.3289
KLHDC3	3	49	26	82.2308	10.9519	9	80.4444	14.4214	14	99.2143	14.6897
LRPPRC	3	49	15	88.9333	10.0711	21	97	12.2783	13	128.462	19.4055
MYL12A	3	49	20	104.45	11.491	18	102.722	11.3202	11	119.909	16.6587
NMT1	3	49	25	70.8	10.4034	14	85.5	10.2523	10	71.6	14.3744
PDZD11	3	49	28	80.6071	8.96896	12	95	15.77	9	102.889	10.9256
PEX26	3	49	16	153.188	14.0157	14	147	12.2316	19	176.684	11.4345
PITPNA	3	49	18	89.7778	9.34475	15	105.133	18.3816	16	109.875	14.5519
POLR3GL	3	49	22	85.5	9.0066	17	78.7059	8.919	10	149.7	15.7099
POP4	3	49	23	72.8696	9.31558	11	85.2727	11.7748	15	88	10.3688
RAB13	3	49	18	76.3889	10.2888	17	95.8824	10.2292	14	105.857	13.1412
RARS2	3	49	28	80.1786	6.32477	9	86.4444	12.8439	12	90.0833	9.06953
REXO2	3	49	18	80.8333	7.95095	15	95.6	10.3652	16	132.125	19.2114
RFC4	3	49	15	83.1333	10.5045	14	119.357	18.0087	20	122.35	13.3631
RNPS1	3	49	18	91.8889	10.6689	16	120.5	12.8708	15	130.533	16.8037
S100A11	3	49	18	92.2778	7.54567	14	84.2857	7.22272	17	128.412	10.7758
SH3GL1	3	49	11	82.2727	13.3324	23	78.5652	8.16323	15	112.8	13.0603
TMEM242	3	49	16	102.188	14.9	16	113.375	16.1107	17	137.765	14.0549
TOMM20	3	49	18	99.2778	13.0277	18	82.4444	10.8617	13	126.846	12.758
AZI2	3	48	17	90.1765	12.3404	14	101.714	12.2188	17	120.882	11.0613
C8orf76	3	48	15	68.8	11.3585	8	93.625	14.0044	25	124.12	13.2395
CDK5	3	48	18	81.4444	12.0345	16	87.625	6.7638	14	94.3571	9.68778
CNP	3	48	16	86.0625	8.78985	19	82.0526	6.50228	13	113.154	14.441
COX7B	3	48	21	113.81	9.10748	14	143.286	15.0243	13	132.923	16.3155
CTBP1	3	48	19	114.105	13.1332	10	109	12.1754	19	85.1053	8.65078
DIMT1	3	48	15	78.2	11.6692	9	114.667	13.3685	24	78.1667	8.44604
FHL1	3	48	29	98.7931	9.19874	10	70.6	7.20444	9	121	21.5779
FUNDC2	3	48	21	79.0476	8.23423	13	77.4615	8.02777	14	111.857	9.77025
HEY1	3	48	26	91.0385	8.14903	14	79.9286	6.24701	8	90.75	14.8816
HMG20B	3	48	24	80.625	9.7209	14	78.0714	7.09805	10	112.2	23.1092
HSPA14	3	48	21	82.7143	7.54973	13	79.0769	9.74191	14	137.786	17.6916
HUWE1	3	48	25	104.84	12.4367	14	119.786	23.0587	9	82.8889	17.2966
ID2	3	48	25	75.48	7.00928	12	83.0833	10.0024	11	81.8182	13.1946
KIAA1191	3	48	17	113.824	13.7088	16	72.1875	5.35769	15	113.867	15.5269
LACTB2	3	48	14	76.6429	9.57868	12	92.6667	12.2352	22	82.5909	9.71062
MRPL14	3	48	21	87	9.68951	13	74.3846	8.3691	14	103.929	11.3984
MRPL35	3	48	20	81.5	9.3815	15	88.6	10.6374	13	94.8462	13.4243
MTIF3	3	48	24	90.875	11.8552	11	66.5455	13.4419	13	130.462	16.4969
NCAPD2	3	48	19	124	15.0333	12	100.167	18.2722	17	120.235	16.6252
NCAPH2	3	48	16	87.4375	7.32982	11	96.6364	14.3511	21	89.7619	12.895
NDC80	3	48	22	93.3182	11.402	12	92	16.9988	14	103.429	14.2165
NDUFAF1	3	48	22	76.5	8.17797	13	85.6923	11.8178	13	78.6154	14.1206
NTAN1	3	48	20	70.65	10.0208	9	67.1111	8.40994	19	78.6316	9.2695
NTMT1	3	48	12	78.25	18.3292	18	88.5	11.9926	18	93.5	12.4878
NUPL2	3	48	18	75.7778	10.1588	14	85	11.8984	16	93	10.7129
PAFAH1B2	3	48	21	109.714	10.0333	14	120.071	14.2197	13	116.923	12.486
PCBP1-AS1	3	48	12	97.4167	9.76705	18	121.611	14.8572	18	116.389	11.7982
PDRG1	3	48	16	99	8.67197	14	94.2143	11.3228	18	110.333	11.3779
PIGU	3	48	16	74.5	9.62662	20	76.8	7.88942	12	82.1667	14.2842
RAD23B	3	48	20	85.9	9.64155	12	113.75	10.4044	16	86.125	10.715
RBM25	3	48	18	94.7222	17.4571	13	113.769	13.6703	17	93.1176	10.1419
RGS10	3	48	15	111.6	14.882	12	88.5833	10.0647	21	124.714	13.7384
RPL10P3	3	48	4	112.75	21.4079	12	132.5	13.8281	32	168.25	9.12971
RTL8C	3	48	21	90.9524	9.14124	18	109.889	11.0548	9	116.444	16.3753
SAT2	3	48	22	97.9545	10.9598	9	108.778	17.0662	17	128.706	15.489
SCOC	3	48	24	87	10.5658	7	140.857	30.4124	17	130.882	19.2091
SERPINF1	3	48	26	86.8077	6.99387	15	106.2	13.6877	7	106.429	15.5049
TAF11	3	48	19	85.6842	9.97422	17	93.5294	12.3496	12	89.75	13.7402
TMA16	3	48	17	67.4706	5.60037	12	80.0833	11.5545	19	87.7368	12.7531
TPD52L2	3	48	20	90.55	13.1918	13	117.077	16.0496	15	104.267	8.54659
TSG101	3	48	16	74.9375	8.24027	18	83.3333	8.51107	14	109.571	17.0227
TSR3	3	48	20	87.75	8.06501	15	99.9333	14.2808	13	120.385	14.6548
APMAP	3	47	18	99.0556	10.9077	11	119.727	17.6402	18	127.556	12.6643
C1orf52	3	47	19	71.8421	8.55753	14	93.2857	13.4454	14	116.357	13.3262
CHMP3	3	47	19	88.2105	7.49352	14	79.2857	8.84759	14	93.4286	15.3629
CHMP4B	3	47	24	99.9583	9.00067	17	101.824	8.38446	6	93.8333	24.8668
CTNNBL1	3	47	22	76.3182	7.72042	14	97.7857	9.54751	11	105.636	23.233
DCXR	3	47	19	111.895	12.2381	17	84.4706	6.67387	11	143.909	17.4097
DOCK7	3	47	13	102.385	10.7354	21	98.8571	10.3342	13	133.154	16.3356
EIF2A	3	47	22	73.8636	10.569	10	80.9	10.9146	15	87.9333	7.65504
ENAH	3	47	24	94.875	9.22356	5	92.4	19.9632	18	90.8889	14.8174
EXO1	3	47	18	85.6667	8.86037	10	103.9	10.9439	19	123.263	11.947
G3BP1	3	47	19	109.316	9.76683	11	89.9091	15.8445	17	103.765	7.30338
GORASP2	3	47	14	79.2143	12.8992	12	111.25	12.6217	21	112.905	11.0116
HDAC3	3	47	23	90.2174	8.46877	16	74.125	10.2343	8	112.25	19.0532
HMBS	3	47	20	81.3	9.43374	16	100.75	9.02752	11	90.9091	10.0128
JPT2	3	47	27	103.444	9.50277	10	86.4	15.9914	10	121.1	10.6728
LMO4	3	47	20	52.3	5.31512	14	56.7857	8.58165	13	67	9.88813
MGAT4B	3	47	24	111.375	9.84988	12	98.6667	10.4019	11	102	20.5084
MTX2	3	47	19	89.4211	9.44215	12	94.25	16.1607	16	99.375	17.8157
MYBL2	3	47	17	88.4118	9.69538	19	86	6.57916	11	74.9091	14.4494
NKAP	3	47	20	102.15	11.7778	13	114.769	13.308	14	125.5	21.7731
NOL10	3	47	24	103.208	7.46403	12	81.5833	8.28021	11	116	16.1091
PARP2	3	47	23	72.4783	7.83257	11	83.3636	11.8142	13	108	16.4191
PRDX5	3	47	22	88.0455	6.46014	16	98.875	13.645	9	84.5556	12.7697
PTPRF	3	47	12	84.1667	18.9879	18	70.6667	6.53575	17	94.5294	11.3309
SEC22B	3	47	19	108	13.996	13	74.6154	9.45781	15	124.4	12.9868
SRSF6	3	47	25	102.68	12.247	6	120.667	13.7349	16	102.5	19.146
TOMM34	3	47	21	105.571	8.66603	14	107.929	14.2762	12	92.3333	11.8862
TRAPPC3	3	47	25	93.44	10.7895	8	65.5	13.283	14	116	13.5096
UBFD1	3	47	19	92.0526	10.6124	10	97.8	16.8249	18	112.222	13.2074
VCL	3	47	18	115.722	14.0237	10	100.5	9.09863	19	122.316	14.6768
ACAA2	3	46	23	79.7826	7.27269	8	102	18.5742	15	101.467	13.4768
BCS1L	3	46	22	77.6818	8.84798	9	113	27.1202	15	95	14.166
BET1	3	46	16	116.938	14.6933	10	100.8	19.3338	20	105.35	13.3363
BUB1	3	46	27	96.4074	8.74062	6	178.833	25.5543	13	93.6154	13.5828
CNN3	3	46	14	109.714	11.806	16	88.625	8.3586	16	137.5	13.8618
COPS5	3	46	23	73.6957	7.91291	13	95.8462	10.3649	10	62.6	8.41095
CREG1	3	46	22	74.0909	5.67978	11	86.3636	11.5353	13	102.538	9.66456
DNAJB6	3	46	11	81.6364	9.47748	20	114.1	12.3404	15	93	9.0254
DRAM2	3	46	17	84.8235	12.8193	13	73.8462	6.59285	16	84.8125	9.19588
ECHDC1	3	46	24	86.375	9.08406	13	91	9.3802	9	120.667	18.4076
EIF5B	3	46	21	85.381	10.3384	15	91.3333	16.2373	10	107.5	15.2291
G3BP2	3	46	19	107.263	12.5673	15	75.9333	11.8725	12	115.417	13.0291
ITGB3BP	3	46	15	90.0667	8.99801	13	101.077	11.1883	18	93.3889	10.6136
KNOP1	3	46	15	75.3333	10.5665	11	103.273	13.569	20	112.4	12.4247
LMNB2	3	46	20	112.5	12.8069	16	101.188	10.9627	10	116.4	12.2165
LSM10	3	46	15	105	15.2712	19	98.6316	9.31362	12	104.167	19.5611
MAP1LC3B	3	46	17	117.824	9.39492	14	102.714	10.6486	15	79.1333	11.8995
MED28	3	46	20	94.3	11.6718	11	89.7273	12.8758	15	115.067	17.3714
MED4	3	46	20	83.9	8.73811	12	76.75	12.1084	14	96.5	11.6399
NFKBIA	3	46	17	98.2941	12.2117	12	85.5	12.2284	17	77.2941	9.24064
NPM3	3	46	20	67.45	7.74451	16	88.6875	11.5125	10	75.5	5.46672
PRPF18	3	46	19	86.5789	8.15817	16	85.3125	11.2332	11	90.4545	16.3845
PTOV1	3	46	21	85	9.21795	14	117.143	12.7174	11	111.455	13.263
RBM6	3	46	26	98.8077	11.3229	13	102.846	10.5302	7	119.429	31.1965
RSU1	3	46	22	102.727	10.5072	9	81	9.87327	15	100.6	10.9625
SEPT11	3	46	22	101.455	11.9765	12	103.75	6.88812	12	89.5	14.6688
SS18L2	3	46	16	103.125	15.5867	10	113.6	17.9629	20	103.8	10.5926
TPX2	3	46	21	89.2857	9.30027	14	87.2857	9.72186	11	120	20.7265
TXNRD1	3	46	22	94.2273	9.85115	12	106.417	9.44021	12	101.667	9.90534
UBQLN1	3	46	20	117.75	12.2352	13	112.538	12.0431	13	116.231	11.7434
UPK3BL1	3	46	12	105.917	12.5324	10	101	11.192	24	136.375	10.8948
ZFAND1	3	46	20	82.05	11.2108	15	98.4667	11.6957	11	77.8182	9.6619
ZMPSTE24	3	46	23	82.7826	7.25109	7	60.2857	10.4856	16	73	9.79118
ABCD3	3	45	15	111.933	11.0729	13	83	8.67834	17	104.471	10.3054
ACLY	3	45	19	104.737	11.5882	12	105.167	14.0222	14	103.429	14.6948
ACO2	3	45	18	102.167	10.9602	19	104.684	7.92977	8	81.625	9.14969
AP1M1	3	45	17	98.2353	10.7544	11	88.8182	13.0497	17	96.3529	14.2148
APH1A	3	45	20	98.2	10.9107	11	98.3636	13.4498	14	93.5714	14.4033
ASNSD1	3	45	12	76.3333	8.81943	14	72.5	12.2386	19	78.7895	7.76046
C20orf27	3	45	20	78.8	5.72608	16	82.75	7.25996	9	65.7778	7.19186
C9orf40	3	45	18	110.833	13.3544	16	87.875	9.70055	11	95.0909	12.1652
CALU	3	45	23	106.391	10.4974	11	112.818	12.8145	11	125.909	15.9288
CAMLG	3	45	10	113.9	20.742	17	94.0588	14.3383	18	124.333	12.5048
CCNI	3	45	18	126.556	7.31742	9	76.8889	14.8934	18	102.5	10.5991
CTSD	3	45	22	101.136	8.36766	13	90.9231	9.44461	10	122.2	11.3752
CYB5B	3	45	23	100.87	9.63616	10	65.9	10.2288	12	106.583	15.1421
DPH3	3	45	18	84.6111	8.81187	14	91.2143	9.66594	13	75.6923	8.59915
DPM2	3	45	20	75.85	7.92505	12	69.4167	7.5263	13	116.538	15.5067
DYNC2LI1	3	45	24	95.4583	9.16496	10	78	6.82202	11	71.4545	12.1569
EIF4E2	3	45	23	85.7826	12.1247	9	73.8889	15.1506	13	91.5385	10.3464
ERP44	3	45	22	74.5	7.47523	15	85.8	11.866	8	91.125	15.4782
EZH2	3	45	15	101.733	11.7562	11	118.182	21.3754	19	116.632	17.7491
FAM213A	3	45	20	96.65	8.73821	16	83.6875	11.1593	9	96.2222	10.5019
FAM96A	3	45	9	97.6667	21.9292	16	100.562	10.9548	20	84.3	8.2632
FYN	3	45	13	90.0769	13.5251	13	114.538	17.168	19	107.947	10.1355
GADD45GIP1	3	45	12	92.0833	6.71799	18	94	8.478	15	114.933	6.61545
GPAT4	3	45	19	106.632	11.4171	9	108.111	11.7078	17	128.824	19.6561
GTF2I	3	45	25	110.4	13.2356	14	121.571	17.0341	6	91.1667	17.7536
HSD17B12	3	45	22	80.5455	11.1925	12	115.25	14.9258	11	118.455	20.6859
IDH1	3	45	18	80.3333	10.4866	20	95.3	8.45816	7	78.4286	12.2455
ITM2C	3	45	18	91.2222	9.89686	13	90.3846	14.9027	14	121.786	12.1711
MAP2K1	3	45	20	76.8	10.1019	13	133.923	13.3059	12	81.4167	8.83684
NAT10	3	45	18	89.1667	10.3382	10	98.8	15.42	17	118.412	19.4271
NDRG3	3	45	16	75.3125	7.19577	11	137.455	18.4782	18	120.333	14.3495
NDUFS2	3	45	20	94.85	9.48901	10	102.6	12.5054	15	110.733	14.8891
NIP7	3	45	19	91.1579	11.7686	11	96.8182	18.0627	15	98	10.8378
NTHL1	3	45	20	83.65	7.93923	12	94.8333	14.1602	13	64.0769	4.75614
PITHD1	3	45	16	129	15.7807	10	108.6	15.4533	19	125.526	10.6865
PNKD	3	45	22	93.0909	11.0118	14	88.1429	12.8368	9	130.556	41.0565
RBM28	3	45	18	113.444	12.9522	16	82.125	7.83466	11	106.182	15.0568
RPA1	3	45	16	103	10.4467	13	116.615	13.8408	16	87.5	7.29994
SEC62	3	45	17	64.4706	6.56357	8	115.5	23.1429	20	100.3	9.57995
SNRNP27	3	45	18	76.8333	6.9798	12	92.0833	9.38487	15	93.5333	12.6336
TAF9	3	45	16	92.1875	13.2117	18	81.0556	8.17534	11	74	8.2412
THOC6	3	45	25	96.64	8.87169	9	93.6667	11.7295	11	101.636	18.9877
TIMM44	3	45	24	86.7917	6.08675	11	84.5455	6.32111	10	93.7	15.2066
TPD52	3	45	19	63.2105	6.56254	17	100.706	9.82503	9	117.778	8.44266
VRK1	3	45	14	71.7857	11.5966	14	111.429	12.5948	17	91.1176	9.56706
APOO	3	44	22	83.7273	9.92642	12	66.6667	4.95722	10	108.9	19.3367
ARIH2	3	44	16	82.6875	7.28425	17	88.1176	9.64486	11	114.636	15.0373
ATG5	3	44	10	91.4	13.9944	16	70.8125	12.1941	18	112.611	11.4153
CAP1	3	44	27	79.5926	7.58749	3	82	25.7466	14	87.0714	8.93769
CLTB	3	44	20	86.8	6.93058	12	83.0833	10.4166	12	122.833	15.4177
CRLS1	3	44	23	87.3913	10.7789	9	82	6.10606	12	79.5833	12.192
CYC1	3	44	20	76.95	14.0935	15	66.6667	7.36398	9	108.444	17.9066
EBP	3	44	18	82.4444	8.59989	15	88.4667	9.6898	11	102.545	15.8361
HDLBP	3	44	19	97.4211	9.84093	17	111.118	14.6057	8	128.75	29.0284
IFNGR2	3	44	17	90.1765	11.9362	15	95.3333	7.78926	12	118.75	15.2152
MAP4K4	3	44	25	70.44	7.61264	9	106.556	15.1202	10	99.2	12.7842
MCM4	3	44	14	117.071	16.3593	15	111.733	17.4472	15	117.533	18.4607
MPZL1	3	44	17	103.882	12.7569	10	96.6	12.9531	17	99.2941	13.668
NCOA4	3	44	14	102.786	12.3045	17	67.7059	11.0759	13	96.1538	11.9381
NDUFA11	3	44	22	66.3182	4.63208	13	93.6923	10.7088	9	139.556	17.2785
NIPAL1	1	44	44	97.8409	5.4743
NUP54	3	44	15	91.9333	10.5769	7	69	9.77919	22	102.682	12.9135
SMARCA4	3	44	24	94.0833	8.08246	12	80.4167	8.78324	8	117.875	14.6078
SMU1	3	44	19	119	12.572	12	107	13.9229	13	96.2308	11.3701
TMEM203	3	44	12	84.3333	10.8949	11	97.6364	10.5692	21	117.286	8.49387
UBE2A	3	44	14	92.2143	13.7188	12	98	14.9495	18	131.333	15.7363
USP7	3	44	21	92.619	10.0293	14	108.571	15.4447	9	91.6667	15.5468
VAMP3	3	44	16	94.0625	9.7574	12	100.583	12.2324	16	97.75	12.12
YTHDF2	3	44	18	89.4444	8.91705	10	86.9	9.44823	16	129	19.3871
ZMYND19	3	44	17	95	13.6453	14	82.8571	11.4771	13	105.462	11.2989
ZNF511	3	44	16	84.875	11.2385	17	76.9412	10.0836	11	103.545	17.4486
ALG8	3	43	16	68.8125	10.653	12	84.3333	9.48342	15	84.3333	14.9172
APRT	3	43	20	79.5	6.59716	15	100.6	9.43318	8	119.375	13.205
AUP1	3	43	18	109.389	19.6423	8	87.25	8.29674	17	148.706	21.9603
B4GAT1	3	43	15	101.333	13.4348	15	114.8	9.91708	13	136.846	16.392
BCL7C	3	43	21	73.8571	5.59206	8	73.5	11.1845	14	120.286	14.2214
CAND1	3	43	10	109.7	22.2531	15	99.8	9.0378	18	109.056	14.5781
CBX5	3	43	10	94.4	8.60953	16	96	10.68	17	91.1176	8.98476
CHD4	3	43	29	101.966	9.29033	10	77.7	10.3034	4	136	24.5586
DLX2	3	43	18	117.778	12.9778	8	116.125	20.7789	17	100.647	12.1905
ELP6	3	43	21	75.3333	8.22483	12	100.833	12.0645	10	120.4	19.4752
FIBP	3	43	27	96.3704	8.67966	11	101.818	11.2704	5	71.2	6.32708
FKBP10	3	43	19	89.8947	10.6123	12	86.5	10.9243	12	117.833	22.8664
FUNDC1	3	43	20	99.25	10.8977	11	105.818	9.10165	12	119.917	17.0931
GCDH	3	43	20	99.55	10.0049	12	97.4167	9.94391	11	105.455	22.1618
IFITM1	3	43	17	64.9412	7.29292	22	91.5455	8.93612	4	75.75	7.24892
IMP4	3	43	17	116.765	15.8905	12	113.75	13.5596	14	100.357	13.4071
KCMF1	3	43	19	82.6842	7.72701	8	84	10.0499	16	95.5	12.5959
KDM1A	3	43	15	104.067	7.59384	15	91.8	11.3495	13	105.308	12.9324
LETM1	3	43	14	88.5714	8.10248	18	98.1667	7.02212	11	119.091	16.4962
MELK	3	43	23	79.6522	6.65419	5	127.2	14.2419	15	101.667	11.4471
MLX	3	43	21	94.8095	10.8353	7	67.2857	13.7332	15	116.133	14.0034
MSN	3	43	22	117.045	13.0646	9	122.444	14.4035	12	127.75	18.8334
NABP2	3	43	23	85.0435	10.7592	10	76.7	11.5005	10	73.4	13.8479
NKX2-5	3	43	22	88.4091	9.50286	8	79.125	9.30631	13	106.538	12.8259
ORMDL3	3	43	20	114.8	10.1392	9	130.667	19.7153	14	136.714	15.6614
PPP1CB	3	43	14	82.5714	10.7218	14	117	14.4776	15	123.333	12.9514
PRCP	3	43	22	94.5	7.7165	8	77.625	9.79945	13	110.308	12.6549
RNF167	3	43	19	73.2632	8.75801	14	93.7857	13.6954	10	106.1	23.7636
RNF8	3	43	17	94.5882	10.0121	13	122.231	14.0359	13	107.846	11.793
SHMT1	3	43	17	74.1176	10.1817	15	87.1333	9.66867	11	112	14.8636
SURF2	3	43	18	86.5	9.081	12	73.0833	13.3959	13	113.615	16.5234
TAF10	3	43	6	104.667	15.2255	20	89.45	6.58843	17	117.235	15.4983
TBCB	3	43	19	93.3158	8.0511	13	107.846	14.5162	11	141	14.5653
TRMU	3	43	18	88.0556	8.78322	12	102.167	15.9308	13	116.462	12.8273
URGCP-MRPS24	3	43	21	108.857	9.19856	14	119.929	10.6548	8	140.125	17.462
UROS	3	43	18	105.556	12.4199	13	112.692	11.7304	12	108.5	10.1485
USP10	3	43	15	89.1333	15.0876	12	90.8333	11.8731	16	88.6875	10.0982
WARS	3	43	21	78.2381	6.75348	12	102.583	10.7571	10	95.9	13.0011
WDR1	3	43	14	72.7857	7.0459	14	87.6429	6.69191	15	90.6	15.1762
ABCF2	3	42	16	80.1875	8.14479	11	133.273	21.892	15	116.667	15.3706
AK4	3	42	15	100.4	12.7027	16	107.25	6.11575	11	104.545	9.31485
AP002990.1	3	42	25	57.56	8.99833	11	71.3636	14.0261	6	108.167	35.6678
CAST	3	42	17	101.706	10.453	14	71.3571	10.5451	11	100.636	17.1306
CCDC47	3	42	15	77.8667	8.86886	12	73.8333	8.75265	15	126.467	16.2324
CDC73	3	42	20	84.1	11.7126	14	85.9286	11.1183	8	105.375	16.2124
CLTC	3	42	20	76.55	6.37239	9	100	15.8644	13	110.462	18.4123
CMC1	3	42	13	100.769	10.3043	14	96.3571	10.421	15	118.2	18.1398
COMMD3	3	42	19	82.5263	8.64933	14	127.286	16.4017	9	147.778	22.9405
COTL1	3	42	17	74.3529	8.13848	12	98.4167	12.5717	13	105.538	9.50031
CRTAP	3	42	21	79.8095	4.71338	12	80.0833	7.12045	9	113.444	13.6211
CUL3	3	42	16	71.75	8.41246	11	66.3636	15.1975	15	133.4	16.677
DCTN5	3	42	15	101.267	10.9319	8	101.25	15.6642	19	96.4211	9.50501
DDX27	3	42	16	115.062	12.0398	9	101.778	20.7975	17	106.647	14.5202
DESI1	3	42	17	88.6471	10.381	15	102.333	11.1772	10	86.6	10.1047
FAM92A	3	42	9	115.556	15.4025	13	86.0769	12.9274	20	120.05	14.1282
FKBP8	3	42	19	82.3158	7.4874	13	89.3077	10.1837	10	100.6	16.4883
GGA2	3	42	16	103.25	17.1212	10	106.3	23.7133	16	80.625	8.94378
GGPS1	3	42	17	83.8824	11.9381	14	94.7857	12.5549	11	96.7273	17.429
GINS3	3	42	19	80.7895	9.875	14	94.2143	11.8508	9	112.667	16.0308
GLUD1	3	42	15	102.4	12.8802	14	111.5	10.1528	13	104.538	11.4827
H1FX	3	42	17	90	11.7556	8	108	6.68019	17	104.176	14.8297
HOXD13	3	42	15	109.267	14.7354	11	87.4545	10.9532	16	111.625	12.9909
IER3IP1	3	42	16	89.6875	11.1516	11	77.2727	14.0272	15	107.533	15.3724
KRTCAP2	3	42	16	90	15.2564	13	78.8462	7.40849	13	163	15.0317
LZIC	3	42	18	98.0556	11.7816	15	72.6667	8.83109	9	87.2222	11.5937
MAD2L1BP	3	42	19	75.9474	6.69621	13	76.3846	6.39391	10	69.2	8.27865
MRPL4	3	42	15	96.8667	11.846	14	93.7143	12.8569	13	102.077	14.5091
MRPS22	3	42	22	73.8182	4.38001	8	92	16.5492	12	74.0833	11.1071
MSMO1	3	42	15	85.8	13.7761	11	91.0909	14.9082	16	112	14.2116
MTAP	3	42	21	108.238	10.3499	8	92	20.3723	13	92.2308	15.1005
NDUFS4	3	42	21	77.3333	9.97283	11	69.1818	7.71798	10	97.4	19.0574
NELFA	3	42	16	87.0625	7.96647	8	130.875	14.3314	18	130.667	14.5479
NUP205	3	42	24	111.375	11.4499	10	103.5	8.14647	8	89.625	17.3051
PJA1	3	42	17	97.5294	9.53671	12	97.6667	10.1601	13	112.462	11.648
PRR14	3	42	13	119.308	8.46041	10	107.4	9.66768	19	124.263	14.941
RBM26	3	42	17	85.8824	11.5498	11	115.182	16.9246	14	87.5	12.0863
RNF113A	3	42	17	76.4706	9.57293	11	94.9091	11.6161	14	99.4286	13.8526
RPRD1A	3	42	16	98.6875	7.34991	13	84.6154	13.8916	13	116.923	13.7072
RPS10-NUDT3	3	42	23	71.2609	9.11224	8	110.875	16.4093	11	120.727	14.6987
SCAMP3	3	42	21	74.5714	8.83268	9	93.6667	16.3118	12	97.6667	10.4045
SH3GLB1	3	42	14	91.7143	15.2591	19	92.5789	6.5137	9	116.778	16.1389
SUPV3L1	3	42	17	86.1176	7.57335	10	91.4	7.4956	15	112.467	11.2692
SURF6	3	42	19	91.4211	9.77909	9	79.7778	16.8756	14	91.5714	11.9812
TFDP2	3	42	21	90.5238	8.06257	10	80.4	11.2118	11	91.9091	12.2794
TIMM17B	3	42	23	89	10.5859	9	105.111	14.6232	10	103.5	8.91544
TM2D2	3	42	18	97.2222	14.0988	14	87	8.90654	10	95.5	11.2883
TMED3	3	42	22	68.8182	6.15691	12	84.8333	8.4359	8	94	17.8054
TRIM27	3	42	12	83.75	8.55791	14	122.357	15.0566	16	130.375	13.3173
U2AF2	3	42	20	111.65	12.2083	9	122	17.9065	13	154.538	13.462
UNG	3	42	12	76	9.56193	14	110.214	11.7487	16	95.5	7.23004
ZNF593	3	42	20	85.7	13.1145	12	104	10.4476	10	116.2	8.19854
AC125604.1	3	41	8	59.125	8.16325	9	72.6667	12.9004	24	58.5	6.86299
ACTN1	3	41	15	109.667	9.8575	13	121.692	17.5955	13	129.846	17.8202
ALDH1A2	3	41	19	103.737	12.5621	9	97.5556	13.0763	13	172.308	12.5963
ANAPC5	3	41	14	80	12.2458	16	96.5625	13.3373	11	87.1818	7.79576
ARPC5	3	41	16	95.0625	12.8356	14	110.429	15.8032	11	92.6364	14.1037
CDV3	3	41	26	99.5769	10.7013	4	90.25	5.16448	11	74.7273	12.8199
CENPM	3	41	14	62	8.77613	16	61.5625	7.36385	11	79	10.5423
CHURC1	3	41	15	104.667	12.6921	15	82.4	10.6787	11	110.455	21.3113
COPA	3	41	13	97.4615	16.8876	8	110.5	8.95475	20	132.3	17.8536
CORO1C	3	41	18	124.5	10.9396	11	130.727	22.7189	12	111.167	12.9962
DCAF13	3	41	18	95.8333	11.4677	14	99.2143	12.6878	9	99.5556	14.713
DHRS1	3	41	13	94.0769	15.955	16	100.188	12.4113	12	104	15.6689
FOXM1	3	41	20	114.4	8.44227	11	119.273	15.5723	10	96.6	12.6477
IPO5	3	41	19	110.579	13.4074	15	112.933	12.9472	7	75.5714	10.9467
KXD1	3	41	20	87.2	13.3708	13	76.7692	9.37841	8	116.25	19.166
MAD2L2	3	41	10	93.5	11.423	14	98.2857	12.621	17	107.176	12.756
MRPL1	3	41	23	79.6957	7.17916	5	51.6	5.76611	13	81.5385	5.53591
NOB1	3	41	21	66.2857	7.53289	7	121.714	14.2753	13	105.615	15.2558
PCLAF	3	41	19	70.3158	10.4203	13	106.308	11.1198	9	82.2222	12.2865
PLSCR1	3	41	14	79	10.6282	11	78.2727	8.03514	16	102.812	15.9976
POLR2J3	3	41	15	93.4	8.23748	14	101.571	12.6538	12	112	13.6621
PTS	3	41	18	87.5556	9.03806	10	89.2	14.0597	13	100	15.9696
RCC2	3	41	15	106.2	16.1224	13	114.385	8.71748	13	107.615	15.2926
RNF220	3	41	17	91.7059	9.84719	9	86.7778	14.1646	15	89.2667	10.1089
RRAGD	3	41	18	72.8889	8.62665	7	78.7143	5.10987	16	107.688	11.9582
SEC11C	3	41	18	85.8333	10.0916	10	78.7	7.78595	13	107	8.63185
SH3BGRL3	3	41	15	102.667	8.41991	13	124.846	12.5735	13	145.231	13.2532
SPAG7	3	41	12	91.9167	11.0908	16	78.25	8.62251	13	96.3077	18.031
TATDN1	3	41	14	90.6429	8.92177	11	72.1818	7.87906	16	90.25	10.2951
TM9SF3	3	41	19	89.2632	15.1037	10	83.3	15.2703	12	114.167	14.1896
TNPO1	3	41	21	116.667	12.7921	8	108.375	18.32	12	109	16.465
TSR2	3	41	18	78.6111	10.5708	10	100.4	12.8609	13	87.2308	11.3753
YDJC	3	41	16	109	15.2672	10	126.1	14.3111	15	149.8	16.0447
ACBD6	3	40	19	92.7368	7.96559	10	79.5	12.224	11	98.2727	11.9587
ACOT13	3	40	21	72.8571	8.26277	12	80.5833	9.41369	7	117.429	19.8904
[truncated: 11,651 more rows]

## Sheet: Key
Represents 13,651 mRNAs; We see an average of ~10,500 depending on the condition we look at in isolation.
Es, WT and Cs represent the 1X, 3X and 11X LARP4 samples, respectively.
Column Header	Description
#gene	Gene Symbol from Gencode Assignment
Samples	Number of conditions CCS reads observed in
TotalCounts	Total number of CCS reads assigned to this gene across conditions
Count_Es (1X)	Number of CCS reads assigned to this gene in the 1X condition
Mean_Es	Mean PAT Length of this gene in the 1X condition
STE_Es	Standard Error of Mean Length in the 1X conditon
Count_WTs (3X)	Number of CCS reads assigned to this gene in the 3X condition
Mean_WTs	Mean PAT Length of this gene in the 3X condition
STE_WTs	Standard Error of Mean Length in the 3X conditon
Count_CSs (11X)	Number of CCS reads assigned to this gene in the 11X condition
Mean_CSs	Mean PAT Length of this gene in the 11X condition
STE_CSs	Standard Error of Mean Length in the 11X conditon
