# Supplementary material for: Single molecule poly(A) tail-seq shows LARP4 opposes deadenylation throughout mRNA lifespan with most impact on short tails
Source: eLife. 2020 Aug 3;9:e59186. doi: 10.7554/eLife.59186 (PMC7413741; doi:10.7554/eLife.59186)
Supplement: Supplementary file 2. [file elife-59186-supp2.xlsx]

## Sheet: merged_WTKO
#gene	Samples	TotalCounts	Count_WT	Mean_WT	STE_WT	Count_KO	Mean_KO	STE_KO
mt-Co1	2	53123	29226	71.5615	0.116219	23897	71.4023	0.123799
mt-Nd4	2	20858	12359	60.7141	0.155529	8499	59.4048	0.18143
mt-Atp6	2	18065	9655	69.1076	0.166766	8410	69.1133	0.174704
Rpsa	2	15794	7269	89.5148	0.454128	8525	87.2665	0.374151
mt-Co2	2	10993	6097	61.0198	0.175456	4896	60.0978	0.190923
mt-Co3	2	9598	5464	69.0586	0.232112	4134	68.7511	0.258766
Eef1a1	2	9597	4772	97.6953	0.626784	4825	87.5372	0.551004
mt-Nd2	2	8968	5006	55.6678	0.244663	3962	55.0906	0.295391
mt-Nd3	2	5533	2594	56.4356	0.263937	2939	55.8363	0.310472
Npm1	2	4938	2550	85.9122	0.865346	2388	81.2881	0.912377
mt-Cytb	2	4794	2636	69.5785	0.348729	2158	69.7507	0.372323
S100a6	2	4586	2600	114.12	0.947889	1986	88.4305	0.93616
mt-Nd1	2	4043	2140	57.7813	0.352478	1903	56.6495	0.390312
Vim	2	3800	1940	70.7747	0.885034	1860	67.5715	0.821938
Actg1	2	3464	1921	97.3774	1.00805	1543	92.2463	1.11854
Rplp0	2	2921	1389	78.0799	0.897433	1532	77.2826	0.777784
Myl6	2	2765	1356	86.149	1.18266	1409	77.2867	0.970735
mt-Nd6	2	2638	1500	54.8413	0.443773	1138	52.7399	0.480255
Lgals1	2	2636	1225	80.6816	1.18705	1411	71.0468	0.901054
H3f3a	2	2547	1307	78.0964	1.04652	1240	73.8976	1.03185
Gm17494	2	2503	1247	77.8709	1.2917	1256	69.6608	1.09585
Rpl8	2	2400	1096	85.1916	1.25394	1304	78.2784	1.00883
Ybx1	2	2189	1125	79.7111	1.04296	1064	76.4831	0.921834
Anxa2	2	2082	1073	87.8919	1.2497	1009	82.328	1.20938
Hsp90ab1	2	2064	1108	95.2103	1.3008	956	89.7301	1.41015
Ran	2	1907	1013	76.151	1.2492	894	69.8132	1.24146
Pfn1	2	1888	1032	131.392	1.36793	856	127.711	1.57023
Ptma	2	1843	967	83.0589	1.3182	876	78.0811	1.52809
Tubb5	2	1810	842	97.4786	1.54888	968	91.689	1.46702
Eif2s2	2	1762	860	61.4512	1.13242	902	59.5455	1.0668
Eef1b2	2	1651	777	69.2716	1.41856	874	61.0309	1.06717
Rpl9	2	1488	796	72.7286	1.35727	692	69.9668	1.38983
Rps14	2	1465	606	72.5924	1.62654	859	60.6845	1.01077
Hnrnpab	2	1319	701	77.0514	1.62414	618	68.5858	1.56488
Rps3	2	1252	636	62.7217	1.26539	616	59.0877	1.21966
Rps2-ps10	2	1218	603	84.8541	1.53812	615	80.9154	1.31436
Rps5	2	1216	616	59.125	1.24477	600	55.215	1.1402
Naca	2	1201	620	86.3839	1.75704	581	75.043	1.67881
Tpm1	2	1185	616	86.9269	1.92089	569	76.4482	1.68919
mt-Nd5	2	1174	685	52.4861	0.773779	489	50.4765	0.950905
Fth1	2	1052	545	76.9303	1.41657	507	77.7101	1.43069
Hspd1	2	1047	583	83.0926	1.82994	464	73.6897	1.97228
Rpl30	2	1020	430	91.4953	2.25777	590	78.6644	1.59833
Serbp1	2	995	512	65.0254	1.57138	483	62.9255	1.63955
Ncl	2	969	517	71.5493	1.74637	452	67.5	1.79713
Gm11808	2	946	417	88.3381	2.05912	529	72.3837	1.3923
Rps28	2	937	494	115.407	2.31404	443	96.1016	2.09387
Rack1	2	933	476	68.2038	1.57956	457	63.9278	1.44155
Tnfrsf12a	2	932	525	107.935	2.49542	407	99.5307	2.87422
Rpl23a	2	926	457	69.9387	1.60892	469	63.8102	1.62385
Eif5a	2	916	448	76.3348	1.71477	468	70.2415	1.41868
H3f3b	2	913	502	76.6295	1.94668	411	73.0803	2.44694
Nme2	2	911	419	90.0859	2.19416	492	80.3943	1.53287
Tpm4	2	865	456	86.0197	2.05283	409	80.2225	1.87585
Rpl5	2	860	409	68.4352	1.90328	451	66.5188	1.58332
Tpt1	2	827	401	68.5436	1.63186	426	66.669	1.41094
Cnpy2	2	819	414	63.2343	1.88309	405	58.0123	1.93239
Rps27l	2	800	393	90.4733	2.24694	407	81.8428	2.11594
Pdap1	2	797	374	78.8984	2.09982	423	76.1655	1.49267
Vcp	2	784	392	86.5204	2.39048	392	82.0204	2.45866
Hspa8	2	781	403	90.2432	2.55326	378	82.0635	2.09735
Hmgn1	2	774	394	80.8046	2.01506	380	73.8868	1.96562
Dynlrb1	2	758	412	76.6286	2.0022	346	69.4162	1.76422
Rpl4	2	735	364	77.9588	1.92369	371	69.2237	1.60619
Acta2	2	732	338	95.5651	2.55601	394	82.2487	2.00731
Rpl11	2	730	353	69.8924	1.95688	377	62.9363	1.75341
Rpl10-ps3	2	703	364	77.9148	2.22816	339	71.9381	2.15002
Calm1	2	701	378	78.8571	2.06417	323	73.4149	2.14591
Anxa5	2	697	358	101.237	2.33283	339	93.3776	2.36492
Cnn2	2	692	364	61.3599	1.6215	328	57.5152	1.59328
Rbm3	2	692	366	81.9973	2.21023	326	70.1902	1.47837
Cct7	2	690	368	78.8614	2.08644	322	68.4161	2.07957
Ube2l3	2	671	344	76.6599	2.2612	327	66.0061	1.97661
Rps13-ps1	2	665	322	87.4752	2.68357	343	69.8805	1.89619
Spp1	2	654	458	86.0611	2.03116	196	81.2704	3.40947
Cct3	2	650	319	75.8809	2.047	331	73.0483	1.73811
Tm4sf1	2	642	371	54.4744	1.49219	271	51.8819	1.99017
Tceal9	2	641	319	66.8683	1.87069	322	64.7391	1.96875
Gm28438	2	640	305	55.7443	0.845165	335	54.8209	0.874394
Rbm8a	2	636	322	69.7826	2.09778	314	62.2548	1.96134
Tpi1	2	628	290	77.1276	2.16577	338	74.1006	1.77434
Cdk4	2	626	343	81.5948	2.22538	283	78.7845	2.80716
Tmsb4x	2	625	314	103.449	2.63021	311	87.9003	2.28508
Timp1	2	608	348	72.9052	2.14022	260	66.8423	2.1873
Rps27a	2	607	292	68.4212	2.0801	315	60.8222	1.6845
Cct2	2	602	299	73.4983	2.25423	303	68.5248	2.214
Rpl17	2	601	276	74.3478	2.38799	325	65.7969	1.83581
Gm28439	2	595	337	38.7982	1.53512	258	39.0426	2.96134
Ilk	2	595	309	87.9806	2.4358	286	75.6853	2.33511
Hmga1b	2	592	290	87.9931	2.20624	302	80.4073	2.01106
Banf1	2	586	263	86.1217	2.60759	323	76.7307	1.98744
Eif4e	2	579	296	67.1926	2.08882	283	61.1025	1.97757
Rpl15	2	573	290	80.0759	2.93334	283	72.8728	2.25638
Hdgf	2	568	281	70.8541	2.12933	287	70.4913	2.16282
Bgn	2	562	315	99.7968	2.69246	247	88.6154	2.96636
Pa2g4	2	559	279	76.9498	2.25708	280	72.1357	1.98649
Cbx3	2	558	345	106.806	2.40377	213	105.197	2.94865
Calr	2	557	272	88.1691	2.93464	285	78.5228	2.64953
Cfl1	2	556	244	81.8566	2.78625	312	73.1923	2.01131
Sarnp	2	549	294	67.4184	2.14906	255	59.3216	2.08022
Rpl3	2	546	278	79.5647	2.34089	268	74.6791	2.28499
Pkm	2	544	248	85.3831	2.59228	296	81.0034	2.40789
Csrp1	2	542	250	85.164	2.70086	292	80.5411	2.38329
Actb	2	541	273	103.7	3.31906	268	106.873	3.60295
Hspa14	2	540	290	92.0138	2.51125	250	74.204	2.15839
Nudc	2	536	276	78.2101	2.2956	260	72.3731	2.31107
Rps3a1	2	533	237	73.9747	2.43104	296	69.3176	2.09234
mt-Rnr2	2	532	196	25.0612	1.25379	336	21.8393	0.653715
Rpl41	2	528	245	87.6776	2.7259	283	75.5724	2.08951
Btf3	2	526	254	78.7835	2.45025	272	70.7353	2.27432
Gm10260	2	526	247	77.3765	2.55913	279	71.2581	2.33226
Gcat	2	521	244	76.209	2.29751	277	70.0866	1.75319
Cdc42	2	519	243	74.572	2.45485	276	71.7283	2.11188
Rps8	2	515	277	74.2274	2.85764	238	68.2437	2.43799
Ubxn1	2	511	266	82.7368	2.46576	245	68.9837	2.13221
Gm3839	2	510	230	81.2696	2.82301	280	69.8071	2.09889
Zyx	2	503	244	81.5492	2.5988	259	78.305	2.47603
Sap18	2	501	278	71.4676	2.29582	223	67.8475	2.6522
Tuba1b	2	501	257	88.786	3.42671	244	77.0984	2.45337
Swi5	2	498	245	82.7429	2.59851	253	83.6364	2.91719
Atp5b	2	495	242	84.9669	2.97873	253	75.3676	2.48919
Hspa5	2	484	247	90.9433	2.73268	237	91.8608	2.86754
Manf	2	484	268	85.2761	2.58715	216	79.5046	3.0382
Arf1	2	482	260	84.2423	2.30048	222	78.527	2.50046
Cct5	2	473	209	76.1483	2.97127	264	69.4015	2.12509
Eif1	2	470	245	88.0939	2.80955	225	86.3022	2.89484
Ddx5	2	469	252	91.2183	3.20895	217	78.1336	3.28426
Rps17	2	452	211	82.6588	3.21358	241	65.668	2.34007
Prdx1	2	451	232	98.1207	2.68217	219	90.726	2.75878
Sumo2	2	451	230	69.3696	2.05261	221	71.4977	2.60096
Bsg	2	449	224	101.442	3.21253	225	96.6178	3.14323
Tpm3-rs7	2	449	231	86.1299	2.79523	218	83.8578	2.53826
Gm29216	2	446	242	69.124	1.48952	204	69.7108	1.06299
Cox4i1	2	445	218	75.1606	2.68603	227	69.2291	2.11083
Hmgn2	2	445	223	79.4036	2.46147	222	69.7523	2.51275
Cd63	2	441	193	82.2383	3.20955	248	71.0645	2.47794
Tcp1	2	441	227	73.7489	2.4251	214	72.2944	2.69997
Ywhaq	2	439	219	73.1963	2.62646	220	68.7045	2.24288
Fau	2	438	180	84.1278	2.991	258	69.9767	2.03467
Reep5	2	430	254	67.9016	2.02951	176	70.233	2.72548
Rplp1	2	424	186	96.0968	3.28378	238	91.2143	2.57612
Hsp90aa1	2	422	237	75.0675	2.56601	185	63.3568	2.61538
Rpl26	2	420	184	67.4946	3.00235	236	59.839	2.04299
Phgdh	2	419	186	80.1183	2.54479	233	74.5322	2.44311
Rpl19	2	419	198	81.1465	3.6289	221	76.276	2.45922
Lmna	2	418	187	81.5936	2.8213	231	75.4372	2.44415
Tubb4b	2	418	225	73.28	2.37246	193	70.7927	2.28504
Rpl35	2	417	177	94.5706	3.55846	240	83.0792	2.39391
Pabpc1	2	416	209	69.1292	2.51825	207	65.0193	2.40611
Ube2d2a	2	414	230	78.6652	2.49407	184	75.3859	3.08507
Psma2	2	413	201	73.2637	2.84738	212	66.2358	2.56086
Cct6a	2	412	227	80.5551	3.23076	185	74.373	3.25896
Ywhae	2	412	198	81.0202	3.0068	214	73.7804	2.98152
Rpl24	2	405	186	74.2097	2.95307	219	68.8721	2.48137
Bud31	2	404	205	73.961	2.61465	199	66.0553	2.61777
Atp5j	2	403	168	93.8571	3.56887	235	81.6979	2.50034
Dnajc8	2	398	191	80.8168	2.72227	207	82.0821	2.83518
Hnrnpa2b1	2	396	212	74.5613	3.06659	184	63.4293	2.53387
Tagln	2	396	208	80.6298	2.83323	188	73.9574	2.86995
Cox5b	2	395	180	85.7	3.19393	215	68.5767	2.36844
Ly6e	2	395	175	87.2171	3.30049	220	83.6864	2.87834
Ndufb8	2	395	162	83.7284	3.40958	233	77.3262	2.41639
Ubc	2	394	182	92.2967	3.32472	212	81.717	2.54561
Anxa1	2	393	187	69.2995	3.10167	206	68.0971	2.83636
Rps26-ps1	2	393	202	78.5594	3.15179	191	71.4712	2.51511
Tpm2	2	389	179	83.1844	3.20182	210	71.4048	2.65497
Tardbp	2	388	202	87.5248	3.54545	186	75.2043	3.63659
Hnrnpd	2	385	209	70.5359	2.70898	176	68.7443	3.00469
Eno1	2	383	170	87.9294	2.7804	213	78.4789	2.4776
Actr3	2	382	196	76.801	3.35363	186	70.8387	3.28515
Pomp	2	382	205	84.7707	3.07223	177	76.8079	2.6938
Set	2	380	207	77.8502	2.48637	173	79.5434	3.73162
Tagln2	2	380	197	94.3249	3.61706	183	89.8852	3.38486
Odc1	2	379	205	76.5805	2.70379	174	68.3218	2.49098
Cavin3	2	378	231	85.6364	2.82654	147	72.8707	3.3523
Eif3a	2	371	192	73.2188	3.7152	179	64.7095	3.83486
Pgk1	2	371	195	79.2821	2.97765	176	75.8466	2.70943
Pcbp2	2	370	178	80.5899	2.99344	192	79.8542	2.84352
Emp1	2	367	233	84.0858	2.98754	134	83.7985	4.44565
Lyar	2	365	202	64.005	2.58597	163	58.3558	3.03405
Scd2	2	365	168	92.6131	3.40962	197	89.7513	3.44265
Rpl6	2	361	170	85.5294	3.41193	191	79.5079	2.76599
Gnas	2	359	175	81.5714	3.11819	184	79.2011	2.65796
Rpl34	2	359	170	77.1	3.10102	189	66.0582	2.46999
Psmc1	2	357	167	78.1677	2.85839	190	68.4737	2.43377
H2afz	2	355	164	81.1463	3.1953	191	75.4555	3.42856
Eef2	2	354	168	89.5417	3.30208	186	76.9194	2.52494
Psmc5	2	353	178	65.9663	2.94513	175	61.9486	2.33939
Srsf3	2	353	193	76.9171	3.17878	160	68.8375	3.181
Tmed2	2	349	178	84.809	2.99683	171	81.5789	3.13357
Tmbim4	2	348	171	73.5673	3.07311	177	62.1695	2.44621
Ppp1r14b	2	347	186	86.0054	2.52939	161	85.5217	2.84217
Pcna	2	345	178	66.6685	2.68659	167	74.7904	3.72956
Arpc2	2	344	192	66.5417	2.54301	152	63.2105	2.95134
Olfr77	2	343	156	96.1859	3.73793	187	72.9465	2.33169
Rpl29	2	342	165	79.6545	3.18414	177	75.5085	2.76739
Il1rl1	2	339	239	98.6234	3.52327	100	112.96	6.46404
Jpt1	2	337	182	82.2308	2.85728	155	75.8516	3.16201
Tipin	2	336	175	73.76	2.85768	161	67.354	2.68818
Eef1g	2	334	158	74.9873	3.05027	176	71.4489	2.7207
Rps4x	2	334	168	71.8274	3.16185	166	65.1988	2.66745
Hmgb1	2	332	171	82.7602	3.83535	161	67.4348	3.41691
Morf4l1	2	328	179	81.3575	3.48492	149	76.6376	3.79857
Psmd8	2	328	159	81.5157	3.32802	169	71	2.82917
Eef1d	2	327	157	94.5796	3.71942	170	77.8	3.17224
Cnbp	2	326	194	82.4124	2.77825	132	86.3939	3.67909
Arhgdia	2	325	156	86.5064	3.1851	169	75.8876	2.45417
Vcl	2	325	171	81.4444	3.22773	154	84.3117	3.59104
Erh	2	323	157	90.1019	3.80929	166	74.1446	2.63435
Pdcl3	2	321	177	75.3164	2.98108	144	67.4167	2.90884
Hspa9	2	319	164	83.7683	2.92483	155	78.2968	3.77369
Rbbp7	2	314	177	69.452	2.5342	137	69.8394	3.31612
Anxa3	2	311	165	80.6303	3.37436	146	65.8014	2.82655
Psmc2	2	311	151	60.2914	2.78396	160	57.2188	2.88029
Txn1	2	310	162	85.6605	3.55858	148	73.3784	3.32633
Dpm1	2	308	148	70.6959	3.25737	160	59.65	2.35595
Tkt	2	307	151	85.106	3.27558	156	81.4167	3.30023
Hmgb2	2	306	156	100.929	3.83555	150	95.36	3.85986
Myadm	2	301	172	24.5233	1.52426	129	26.5814	2.31835
Cetn3	2	299	156	72.5385	3.41794	143	63.8392	3.08569
Nop56	2	299	147	87.102	4.88942	152	79.7303	4.19553
Rps7	2	298	131	74.4504	3.22351	167	65.1737	2.10572
Fkbp3	2	297	155	78.0774	3.11451	142	69.8732	3.21258
Hspe1	2	297	160	71.875	3.45182	137	66.8905	3.82749
Sub1	2	297	160	73.9813	3.24432	137	63.4891	3.03411
Pdia3	2	295	135	85.9259	3.90777	160	79.7062	3.75322
Gm9844	2	294	148	95.8716	2.81401	146	97.0548	4.14393
Gnai2	2	294	147	83.0476	3.3249	147	72.8571	2.97639
Rps9	2	294	129	78.1628	3.52093	165	75.4848	3.08627
Rpl10a	2	293	129	70.4884	3.49686	164	69.6646	2.94912
Sparc	2	293	137	87.4161	4.89075	156	77.9872	3.75779
Uqcrc1	2	292	151	80.3245	3.15898	141	72.2837	3.19108
Ddx39	2	291	158	87.1329	3.62079	133	81.609	3.82802
Sdha	2	291	145	75.5931	3.68466	146	71.1301	2.90508
Gpx8	2	289	135	73.6148	3.3534	154	63.5325	2.51142
Pcolce	2	289	135	89.4148	3.41223	154	83.0779	2.85111
Anp32b	2	287	157	74.3248	3.20898	130	69.8692	3.9088
Dstn	2	287	171	82.3977	2.43975	116	72.8017	3.40456
Nme1	2	287	140	96.0571	4.29304	147	77.4694	3.1276
Pcbp1	2	284	154	84.3117	3.14368	130	74.8769	3.10781
Arf4	2	283	156	72.4423	2.7327	127	68.0709	3.38786
Kpnb1	2	281	157	76.1083	3.4655	124	76.5242	4.72094
Ppp1ca	2	281	130	78.5154	4.01595	151	69.1987	3.00163
Ppp2ca	2	281	155	83.7613	3.16984	126	74.5873	3.38167
Cct8	2	280	147	85.6735	4.15821	133	72.3233	3.51813
Slx1b	2	278	141	118.184	5.52548	137	126.285	6.10034
Ssb	2	278	149	68.3289	3.31909	129	68.093	3.58162
Fam221b	2	277	124	97.8226	3.28217	153	86.7908	2.96996
Nap1l1	2	276	138	71.5725	3.29118	138	66.2174	2.81525
Rps24	2	275	120	72.075	4.17548	155	73.8194	3.46185
Tsn	2	275	146	66.5411	3.62134	129	59.5194	3.06287
Psmd14	2	271	145	65.6207	2.75377	126	62.3254	2.94317
Rpl32	2	270	115	85.3652	4.63775	155	72.9871	3.07064
Rpl21	2	268	133	75.2481	4.11929	135	74.8519	3.52279
Thoc7	2	266	132	71.9697	4.06212	134	64.6716	3.45503
Lap3	2	265	147	62.2925	3.04884	118	57.4492	4.00324
Ccnb1	2	262	130	77.2154	3.90784	132	66.7879	3.22928
Myl12a	2	262	137	93.4964	3.84277	125	81.496	3.56473
Ubb	2	262	129	84.6279	4.26169	133	71.594	3.51632
Csnk2a2	2	260	138	112.442	5.37424	122	99.7295	5.52236
Hsp90b1	2	259	132	85.4545	4.63424	127	84.2126	4.25746
Actn1	2	258	108	81.3611	4.83986	150	85.5333	3.81142
Ranbp1	2	258	127	89.622	3.84636	131	83.5267	3.49434
Upf3a	2	257	134	70.4627	2.6526	123	66.439	3.6149
Gm7324	2	255	130	80.7	3.50772	125	84.432	4.10256
Pitpna	2	254	115	77.2	3.71122	139	65.9065	3.11129
Rps16	2	251	126	63.6905	2.98795	125	58.04	2.67605
Rpl35a	2	249	113	76.469	3.26296	136	75.3529	3.09111
Ebna1bp2	2	248	127	76.3622	4.09712	121	71.3058	4.47511
Strap	2	248	128	72.8438	3.47329	120	63.6	3.08787
Atp5g3	2	247	122	78.7295	3.34742	125	72.104	3.01588
Tspo	2	244	119	85.7983	3.82931	125	80.36	2.92591
Nars	2	242	138	72.6594	3.96287	104	71.9712	4.93449
Rps19	2	242	78	91.3462	5.44021	164	76.1707	3.1419
Phb	2	240	111	77.0991	3.58776	129	72.7054	2.84502
Vdac3	2	240	122	61.1066	2.89586	118	63.0932	3.55193
Cycs	2	239	120	68.45	3.25284	119	60.5294	2.90112
Hnrnpr	2	239	131	86.5496	4.49862	108	78.6481	4.51537
S100a11	2	239	121	124.983	4.43678	118	106.212	4.94617
Slc25a4	2	239	115	70.9826	3.63314	124	64.5806	2.92659
Fabp5	2	237	115	66.7217	3.09901	122	57.9836	2.58242
Psma5	2	237	122	56.5246	3.28731	115	50.4174	2.8186
Dtnbp1	2	235	118	75.5169	3.28089	117	66.359	3.2696
Nudcd2	2	235	126	75.6984	3.67496	109	64.7339	3.39136
Pttg1ip	2	235	129	87.186	3.91676	106	90.9906	5.32003
Tuba4a	2	235	151	80.0728	3.11987	84	76.1071	4.94554
Birc5	2	234	119	81.1765	3.86209	115	88.9652	4.60139
Magoh	2	233	114	65.5263	2.87265	119	69.1765	3.75004
Idh2	2	232	112	77.4821	2.95537	120	77.7667	4.33575
Marcksl1	2	232	98	98.7755	4.01793	134	95.6791	3.87443
Psmb4	2	232	116	70.7586	3.59793	116	67.9741	3.78749
mt-Rnr1	2	232	123	42.4553	1.21262	109	38.4312	1.32106
Rap1b	2	231	123	66.122	3.13325	108	66.1481	3.8068
Taf10	2	231	122	88.2213	4.12636	109	83.1284	4.14904
Cops4	2	229	108	76.2222	3.65475	121	73.3554	3.15291
Rpl36a	2	227	111	80.4955	3.87006	116	74.3879	3.29644
Sdhb	2	227	121	73.6529	4.82763	106	65.2358	3.91973
Smc4	2	226	116	66.25	4.12647	110	55.9273	3.98007
Hnrnpa0	2	225	113	96.0619	5.70589	112	79.1875	4.98768
Snrpb2	2	225	114	75.8947	3.6071	111	68.6757	4.14515
Hnrnpa1	2	224	113	79.7876	3.44034	111	80.6216	4.37465
Timp2	2	224	130	80.9231	4.04214	94	72.9362	3.67038
Eif3m	2	221	112	68.2679	2.99258	109	68.4312	3.19412
Cfdp1	2	219	108	73.1759	3.78127	111	65.8559	3.44111
Hnrnph1	2	219	118	77.5339	4.66155	101	75.0891	5.42975
Hnrnpk	2	219	125	82.864	4.10461	94	78.6489	4.93568
Efemp2	2	218	103	94.6117	3.67317	115	83.9043	3.25663
Eif4a1	2	218	106	95.5189	4.15832	112	86.6875	4.59224
Ywhah	2	218	116	94.4741	4.60405	102	75.8627	3.73716
Hnrnpc	2	217	106	84.6415	4.34713	111	75.8288	4.16218
Atp6v0e	2	216	111	84.2973	3.47168	105	83.5238	3.88525
Sgk1	2	215	137	87.0876	4.46379	78	75.2564	5.63885
Crabp2	2	213	144	76.5	3.32892	69	75.9565	4.59708
Metap2	2	213	115	77.1739	4.42219	98	73.4592	4.9051
Ube2q1	2	213	122	80.7869	4.18706	91	67.3626	3.99564
Nhp2	2	212	108	77.2222	4.13528	104	71.25	4.1582
Sars	2	211	97	81.4124	4.54584	114	72.9474	3.71576
Etfa	2	210	96	76.875	3.91778	114	69.4561	3.56091
Rfc4	2	210	99	69.7576	3.9719	111	69.6306	4.8356
Ndufa4	2	209	101	99.5743	4.03296	108	90.25	3.57779
Pmf1	2	209	109	82.367	4.10816	100	82.17	4.97641
Psmd12	2	209	107	61.4673	3.16082	102	55.9412	2.98834
Rtn4	2	208	101	81.901	4.57722	107	79.271	3.90432
Babam1	2	207	101	76.3663	3.65669	106	73.3774	2.89991
Nsa2	2	206	106	69.0849	3.76152	100	56.6	2.85972
Tcea1	2	206	104	72.5962	4.15346	102	58.9412	4.84948
Aldoa	2	205	103	84.4757	3.66592	102	70.7353	3.18792
Pdlim7	2	205	104	81.8846	4.38076	101	75.3564	4.69891
Mdh2	2	203	100	88.4	3.8173	103	82.2233	3.53694
Adsl	2	202	93	72.9462	4.55415	109	74.5872	3.54837
Chmp4b	2	202	110	97.0727	4.51709	92	83.4674	5.18729
Mmadhc	2	201	123	71.0081	3.18953	78	64.2308	3.68544
Snrpd1	2	201	99	70.0101	4.11287	102	64.8235	3.22447
Tubb6	2	201	100	82.64	3.61435	101	79.802	3.90375
Ybx3	2	201	95	73.6316	3.7733	106	69.1321	2.77824
Ckap4	2	200	101	82.7624	4.20572	99	83.9596	4.3853
Eif3e	2	200	105	63.1714	3.43746	95	63.2	3.52406
Gm12184	2	200	95	75.5789	3.65488	105	73.9333	3.19217
Mrpl12	2	200	98	85.2041	3.77421	102	82.598	4.03787
Csnk1a1	2	199	85	82.4941	4.13106	114	67.7982	3.53534
Chchd2	2	198	83	83.253	4.64244	115	83.6	4.2808
Nop58	2	198	112	59.3929	4.08629	86	53.1279	3.29207
Rpl23	2	198	101	83.0099	4.8239	97	68.5155	4.28512
Snrpe	2	198	105	97.9429	5.87984	93	88.0108	4.77047
Npc2	2	197	102	81.0294	3.8835	95	74.0632	3.59722
Nucks1	2	196	100	88.4	6.17926	96	84.5521	6.15784
Calm2	2	195	114	68.5088	3.00188	81	73.716	4.54644
Rac1	2	194	111	81.4595	3.6511	83	70.1084	4.97647
Fkbp1a	2	193	100	99.49	4.52569	93	96.5484	5.45161
Paip2	2	193	113	62.177	3.22083	80	53.425	3.45239
mt-Nd4l	2	193	101	44.8416	2.4848	92	41.0652	2.61312
Eif4g2	2	192	105	77.8762	3.97755	87	71.1724	4.99687
Selenof	2	192	105	88.1333	4.45106	87	80.1724	4.26588
Spc25	2	192	104	83.3269	4.26293	88	67.0455	3.60408
Arpc1b	2	191	95	83.0526	4.62635	96	71.375	4.33284
Pgrmc1	2	190	125	75.112	3.27409	65	79.2615	4.73353
Hspa4	2	189	111	68.5315	3.39631	78	65.359	3.9655
Sdcbp	2	189	94	73.7872	4.55826	95	60.0211	4.93694
Eif4a2	2	187	104	83.8942	5.8568	83	77.1205	6.59302
Psmc6	2	187	84	72.9762	4.37124	103	57.4951	3.11346
Psmd6	2	187	91	73.956	3.90254	96	66.1354	4.24427
Cops6	2	186	94	59.6383	2.68245	92	57.7609	2.50752
Rpl28	2	186	85	82.2118	5.10461	101	75.3168	4.60537
Dhx15	2	185	98	73.0816	3.83895	87	75.931	4.18131
Gnb1	2	185	91	93.5055	4.77792	94	81.5851	3.92619
Mbd2	2	185	108	72.3704	4.00042	77	69.7143	4.19156
Pgam1	2	185	84	85.869	4.68373	101	85.6832	4.43502
Ccna2	2	184	93	71.9355	3.92571	91	71.0659	4.74239
Hnrnpa3	2	184	106	76.3679	4.86647	78	69.6154	5.2485
Acp1	2	183	104	76.9327	3.97806	79	73.2658	3.61741
Mcm7	2	183	97	83.7732	3.60564	86	71.3023	4.02366
Nono	2	183	81	79.1111	4.06614	102	72.6078	3.7775
Snrpg	2	183	85	99.7294	5.12667	98	89.2959	5.28806
Gm12355	2	181	85	70.2235	3.44159	96	69.9479	4.38437
Ndufv2	2	181	76	64.1447	5.95245	105	59.419	4.04135
Rrp15	2	181	89	69.382	4.00462	92	72.2174	4.12662
C1qbp	2	180	85	84.0471	5.94151	95	66.2211	3.60763
Eif1ax	2	180	77	64.7273	2.94388	103	64.5825	3.23872
Rhoa	2	180	101	88.2574	4.35064	79	81.1266	4.82444
Ube2d3	2	180	100	80.13	4.82223	80	66.1875	4.83115
Scp2	2	179	104	70.8269	3.38919	75	71.3467	4.72897
Selenot	2	179	82	66.0244	4.61495	97	62	3.91994
Ssrp1	2	179	89	73.2697	4.64342	90	76.6889	4.44632
Stip1	2	179	81	86.3951	3.92424	98	90.7041	4.18465
Tuba1a	2	178	80	84.9375	4.39415	98	79.6429	3.33123
B2m	2	177	92	107.576	6.51613	85	89.7059	5.95398
Coro1c	2	176	100	96.08	4.3823	76	82.5263	4.34918
Gemin6	2	176	101	55.7129	2.72636	75	52.28	2.86841
Anapc5	2	175	79	86.9367	4.69657	96	82.1146	3.16533
Hnrnpdl	2	175	88	75.2045	3.86214	87	64.4483	4.81377
Phb2	2	175	92	78.0217	4.14699	83	63.241	3.55961
Serpinh1	2	175	87	99.9885	4.76865	88	96.5114	5.48924
Morf4l2	2	174	84	102.488	5.31714	90	86.4778	4.90762
Ap1s1	2	173	89	83.236	3.70143	84	73.3214	3.87332
Rrp9	2	173	88	73.1136	3.92322	85	71.6353	4.13776
Lamp1	2	172	88	91.5568	4.93571	84	87.4286	5.0928
Nedd4	2	172	81	81.9753	6.40235	91	71.0549	5.48675
Prdx2	2	172	83	85.4096	4.21298	89	82.7978	4.00622
Vps36	2	172	86	57.2558	2.82432	86	57.407	3.14888
Ctsl	2	171	97	80.0412	4.0235	74	87.2568	6.1242
Rps11	2	171	74	81.1216	5.07579	97	70	3.52297
Shmt2	2	171	89	94.5618	4.96876	82	89.7683	4.08787
Mitd1	2	170	83	79.3494	4.40366	87	64.9195	3.23098
Park7	2	170	92	79.7174	4.01463	78	68.2949	4.5021
Rpl7	2	170	80	69.5125	4.3836	90	61.6889	3.38065
Srsf6	2	169	88	81.5114	4.50184	81	74.7037	3.90559
Stt3a	2	169	87	76.1149	4.62836	82	57.0854	5.03274
Dctn5	2	168	93	77.1505	3.97125	75	73.12	3.99141
Drg1	2	168	94	69.7128	3.11241	74	71.6351	4.603
Fus	2	167	101	87.9505	5.99386	66	78.6364	6.91721
Gnb2	2	167	78	90.6026	4.31605	89	91.8876	4.44227
Lrrfip1	2	167	97	79.1443	3.84336	70	77.3571	5.781
Nmd3	2	167	90	67.7667	4.48341	77	60.8052	3.95574
Snx5	2	167	99	69.6667	3.75983	68	70.2794	6.52649
St13	2	167	82	83.8659	4.87865	85	68.3059	3.52992
Aifm1	2	166	82	91.0366	5.97072	84	74.25	3.92189
Atp5c1	2	166	80	74.8875	4.69258	86	66.6163	3.84623
Msmo1	2	166	93	68.6774	4.13519	73	62	5.52777
Orc6	2	166	92	80.4022	4.55203	74	81.4865	5.21629
Psat1	2	166	77	67.2597	3.73775	89	69.4382	3.65035
Fn1	2	165	81	128.111	7.72457	84	107.548	6.06885
Gdi2	2	165	86	76.2209	4.13994	79	62.2278	3.24204
Ptms	2	165	83	104.723	5.35648	82	107.537	5.68814
Rpl38	2	165	91	107.824	5.08409	74	97.0676	5.16472
Abracl	2	164	102	72.5098	4.60277	62	56.4355	2.81807
Clic1	2	164	81	90.7037	5.05219	83	81.0241	4.49716
Ctgf	2	164	90	103.289	6.54989	74	101.743	5.79429
Flna	2	164	92	108.141	6.38725	72	96.2222	5.33077
Txndc5	2	164	78	101.641	4.99247	86	89.3605	5.62045
Ube2k	2	164	77	63.0649	4.77521	87	60.6667	4.10596
Smdt1	2	163	70	102.557	6.46613	93	96.4839	4.27183
Fscn1	2	162	85	93.1294	4.98715	77	87.974	4.98552
Lsm6	2	162	79	88.8987	7.11808	83	92.3373	6.24006
Tra2b	2	162	88	75	5.2293	74	59.5	3.88674
Uchl5	2	162	71	62.0563	4.46503	91	58.4396	3.04724
Prkar1a	2	161	77	65.7013	4.66388	84	64.2024	4.46156
Axl	2	160	88	76.5795	4.32791	72	86.6667	6.00366
Cdc37	2	160	75	82.5733	4.58915	85	79.3412	4.23266
Eif4e2	2	160	77	73.961	4.69963	83	61.0964	2.58302
Hdac1	2	160	80	84.1875	5.08727	80	82.125	5.6269
Dnaja1	2	159	66	86.0758	5.59894	93	74.1398	4.79971
Fdps	2	159	78	87.6795	5.37485	81	73.3704	4.2928
Gm28437	2	159	88	60.6364	1.78023	71	60.2817	2.20675
Hint1	2	159	70	80.5857	4.63216	89	68.7865	3.74427
Ociad1	2	159	89	77.9888	4.62644	70	78.6429	4.97709
Sec61a1	2	159	69	75.0435	4.75271	90	81.9556	4.46702
1110004F10Rik	2	158	71	72.0704	4.85077	87	65.0575	4.41467
Fkbp4	2	158	80	76.6375	4.73927	78	70.2949	4.00144
Atp5a1	2	157	66	71.4242	4.58884	91	74.2747	3.94706
Luc7l3	2	157	83	62.253	4.13788	74	71.3378	4.33463
Papola	2	157	71	62.5352	4.19287	86	62.3953	5.12294
Snrpb	2	157	74	85.527	5.25216	83	67.6506	3.54534
Zcrb1	2	157	79	76.1266	4.93698	78	63.7564	4.91396
Rab1a	2	156	83	64.5422	4.454	73	63.6986	5.57336
Ube2r2	2	156	78	60.7949	3.17873	78	57.3718	3.82013
Atg3	2	155	90	69.1444	5.49403	65	64.4923	4.56931
Rpl27	2	154	61	66.7705	3.60674	93	60.5161	3.68177
Rps6	2	154	75	78.1067	4.55007	79	71.9114	4.27568
Cct4	2	153	80	66.775	3.3349	73	65.0685	3.77999
Fbl	2	153	90	93.9111	4.99841	63	70.2222	4.02408
Snx3	2	153	81	71.4691	4.12217	72	80.7639	5.60366
Dcun1d5	2	152	74	69.1081	3.96462	78	62.6154	2.90142
Rps27rt	2	152	66	104.212	6.46785	86	102.663	5.41385
Hnrnpm	2	151	78	101.41	7.4434	73	86.1096	6.03647
Ldha	2	151	75	70.9867	4.08929	76	73.2237	3.94546
Grpel1	2	150	72	69.9167	4.20513	78	66.3205	3.19961
Ctnnb1	2	149	74	98.5541	4.99222	75	92	4.8166
Cfap36	2	148	81	53.8148	3.63861	67	48.597	2.68442
Cox7c	2	148	75	101.973	7.7895	73	63.8493	3.59425
Ola1	2	148	75	71.9333	5.39492	73	63.1918	3.74214
P4hb	2	148	75	98.0133	5.6751	73	82.6438	4.41476
Vapa	2	148	81	88.5432	4.6332	67	82.3284	5.34071
Eif4b	2	147	68	65.9706	4.11029	79	60.6329	4.60652
Cyr61	2	146	73	75.3973	6.09177	73	72.2877	5.03821
Etfb	2	146	63	77.8095	5.1937	83	71.5904	4.62801
2019-09-07	2	146	66	67.3182	6.1921	80	66.975	5.33725
Ubap2l	2	146	73	73.3151	5.45122	73	63.4658	5.63129
Bag1	2	145	69	66.2609	3.03011	76	74.2368	3.27729
Commd4	2	145	62	79.7742	5.0034	83	76.9518	5.30257
Srsf1	2	145	83	73.8313	5.16087	62	69.5	6.2334
Ncaph2	2	144	61	81.3443	5.14586	83	72.3133	3.71291
Snrpd3	2	144	79	76.8481	3.89368	65	81.6154	5.53729
Srsf9	2	144	83	83.1807	4.12819	61	73.7541	5.2328
Surf4	2	144	61	93.5738	5.82147	83	77.988	4.29401
Zc3h15	2	144	84	67.619	4.32908	60	63.8667	3.69891
Eif6	2	143	74	73.2027	4.80686	69	70.1884	5.13262
Laptm4a	2	143	72	83.9583	5.73241	71	80.6901	5.62064
Pfdn2	2	143	71	104.465	6.21887	72	86.5972	6.39365
Rpl13a	2	143	77	93.4805	6.7307	66	78.5	6.06785
Tceal8	2	143	60	71.7333	5.12905	83	73.6386	5.37205
Tmpo	2	143	70	83.7	5.56316	73	72.2329	5.34241
Triobp	2	143	71	90.3662	5.42121	72	82.9028	4.94851
Atxn10	2	142	73	92.9452	5.90342	69	79.913	4.23827
Cnot8	2	142	77	83.013	5.528	65	71.7538	5.12098
Dynll1	2	142	64	73.1406	5.85209	78	70.7949	6.08593
Mrfap1	2	142	77	98.026	5.10176	65	87.3846	4.30251
Fbln2	2	141	83	149.566	7.90534	58	138.776	9.01841
Mtch1	2	141	70	94.0714	5.5317	71	89.3944	5.5799
Arpc5	2	140	77	88.1429	4.21911	63	74.8571	4.35435
Brix1	2	140	75	59.72	5.22274	65	67.2	4.7967
Bzw1	2	140	67	61	4.86155	73	62.4247	4.82129
Cacybp	2	140	78	62.8718	3.85939	62	72.5161	4.21358
Capza2	2	140	61	67.9016	4.92757	79	62.8734	4.93133
Gm10925	2	140	65	55.4769	2.28451	75	57.4667	2.02257
Pdlim1	2	140	76	78.5263	4.84201	64	64.75	3.86996
Polr2m	2	140	82	80.1098	5.6276	58	85.1724	5.52764
Smarce1	2	140	73	73.9726	4.10653	67	94.6716	7.31527
Rnf126	2	139	73	84.0959	5.72842	66	68.803	4.51125
Lsm3	2	138	68	77.8971	4.39502	70	65.7286	3.93244
Mprip	2	138	75	94.4667	6.65336	63	94.2857	6.03285
Pnp	2	138	73	71.7671	4.31781	65	81.7692	5.75865
Rheb	2	138	65	68.7385	6.95566	73	68.4384	4.31648
Rps10	2	138	71	74.4507	5.28538	67	63.4627	4.40914
Rwdd1	2	138	65	65.2308	3.62769	73	62.4932	3.81384
Clic4	2	137	85	79.2941	5.25375	52	65.4808	5.10797
Cops3	2	137	69	82.3478	4.48971	68	71.6324	4.07955
Fcf1	2	137	69	58.1884	3.79441	68	53.8088	3.08993
Gabarap	2	137	75	84.3867	4.2551	62	82.9032	6.29093
Hmga2	2	137	83	78.8916	6.39624	54	91.3704	10.2114
Maea	2	137	65	90.4154	5.1326	72	99.4583	9.08656
Rnh1	2	137	57	88.6667	5.93835	80	83.7375	3.7539
Sae1	2	137	73	77.1781	4.70062	64	84.3281	4.9379
Stoml2	2	137	69	104.551	4.82274	68	90.6324	5.56041
Psma3	2	136	66	81.8636	4.86521	70	69.7714	4.45449
Snrpa	2	136	63	94.6825	6.43066	73	75.5753	4.34944
Snrpd2	2	136	71	83.4225	4.77756	65	71.7231	4.40304
Ugdh	2	136	72	80.8194	5.37241	64	80.5156	5.54192
Itm2b	2	135	77	77.6104	4.54809	58	74.3966	5.99474
Mki67	2	135	69	77.2174	5.65102	66	74.3485	6.31127
Mlf2	2	135	61	88.1311	5.23582	74	94.7568	5.76604
Ppp1r7	2	135	59	72.8305	4.71882	76	60.8158	3.73965
Rps23	2	135	65	64.5385	3.57871	70	65.9429	3.98051
Col1a1	2	134	71	107.817	6.57013	63	107.159	7.25333
Ergic2	2	134	79	64.7215	3.57549	55	53.6364	3.97333
Hnrnpu	2	134	72	99.1389	6.68147	62	77.5806	7.41418
Rps20	2	134	65	95.9077	5.7616	69	81.5072	4.54609
Sptssa	2	134	74	71.3649	4.09741	60	73.3667	5.3252
Tra2a	2	134	61	65.2787	4.31413	73	67.5068	3.68318
Acaa2	2	133	70	84.8143	3.97904	63	80.619	4.02721
Bcap31	2	133	59	84.3051	6.51109	74	82.2432	4.70568
Ftl1-ps1	2	133	62	79.4355	3.99893	71	87.1972	5.45398
Idh3b	2	133	69	72.1159	5.85125	64	53.6406	3.16084
Lasp1	2	133	66	80.3939	4.25112	67	75.3433	4.57021
Mapk1	2	133	79	74.2405	4.66315	54	73.2037	6.04716
Psmb5	2	133	59	72.7797	5.3853	74	68.7027	3.79033
Psmd13	2	133	71	78.0704	4.91133	62	74.9355	4.93859
Slbp	2	133	64	89.0312	5.64346	69	89.942	6.36834
Capn2	2	132	66	81.3939	5.76271	66	76.4394	4.71576
Cdca8	2	132	73	74.9178	5.06689	59	68.6441	5.13824
Denr	2	132	75	75.2	3.8185	57	70.2281	4.83594
Dnajc2	2	132	62	57.2258	3.09269	70	48.8857	2.9404
Calu	2	131	66	73.1515	6.76112	65	84.1231	7.57784
Rab2a	2	131	68	69.25	4.2967	63	54.9206	3.5329
Rap1a	2	131	80	68.75	3.92458	51	68.0588	5.16669
Sumo1	2	131	74	79.6892	4.92648	57	72.6491	5.80622
Ddx39b	2	130	67	96.8507	6.57775	63	85.4444	5.87481
Mvb12a	2	130	61	68.2951	4.35303	69	65.9565	4.10252
Tbca	2	130	56	83.3036	6.65168	74	83.2162	7.04346
Cyba	2	129	67	72.0299	4.19427	62	65.8065	3.65513
Fis1	2	129	63	86.2857	4.13951	66	76.5303	4.64073
Glud1	2	129	59	79.6441	5.3863	70	74.4857	4.99611
Nsmce2	2	129	68	69.5588	3.75662	61	70.1475	5.648
Psma4	2	129	53	84.4151	5.38093	76	73.0263	4.37792
Dctn6	2	128	68	86.2941	5.81052	60	77.1667	4.21025
Dnaja2	2	128	63	64.6349	4.16644	65	68.7692	4.87096
Eif3b	2	128	67	88	5.04959	61	75.9836	4.22986
Eif3i	2	128	62	79.7258	6.34091	66	65.7273	3.55435
Hikeshi	2	128	78	43.7692	3.42866	50	45.32	3.87912
Rad21	2	128	79	77.1266	3.8661	49	74.449	4.74322
Syncrip	2	128	69	71.9855	5.39273	59	71.0169	5.97488
Tmem9	2	128	62	83.5645	4.73192	66	85.7424	4.3333
Atp2a2	2	127	63	82.6984	4.91949	64	68.5938	4.70926
Cdk1	2	127	73	63.7123	3.81877	54	77.6296	6.98933
Hsd17b12	2	127	63	70.8889	4.78771	64	71.0156	5.22798
Isg15	2	127	56	77.3929	6.4908	71	70.5493	5.32476
Ppp1cc	2	127	66	83.8636	5.46274	61	75.2295	5.05117
Psmd2	2	127	52	94.2115	6.31392	75	89.8133	5.3885
Ube2n	2	127	65	77.6308	5.10827	62	73.3387	5.33205
Aimp1	2	126	63	65	4.79065	63	53.8254	4.00476
Cdca3	2	126	63	93.4762	6.47988	63	79.4127	4.68088
Cwc15	2	126	66	79.2879	5.12344	60	74.9167	5.78856
Kpna2	2	126	65	91.6615	11.0155	61	88.1475	6.59256
Pmepa1	2	126	84	71.7738	4.1494	42	66.5	6.88011
Rsl1d1	2	126	68	80.2941	5.50869	58	78.9655	6.79039
Sec61b	2	126	61	92.6066	5.63111	65	77.0923	4.7022
Tfdp1	2	126	66	79.4545	5.19351	60	65.1167	5.13539
Zwint	2	126	71	70.8451	5.16841	55	63.9636	5.9819
Commd1	2	125	47	82.9149	4.86949	78	75.9872	4.12081
Cops5	2	125	69	64.7971	3.99499	56	65.9821	5.53079
Ppp1cb	2	125	48	66	9.77205	77	37.961	3.62128
Ptp4a2	2	125	76	66.1053	4.91273	49	58.8776	5.91503
Rpl31	2	125	75	73.7333	3.75888	50	77.88	6.66859
1110008F13Rik	2	124	67	78.7463	4.85313	57	63.6491	4.52322
Alkal1	2	124	67	93.5373	6.36095	57	76.2281	5.63243
Lrrc59	2	124	61	75.8033	3.96524	63	71.7619	4.19509
Mdh1	2	124	61	70.6557	4.48689	63	69.1587	5.37452
Anxa6	2	123	62	93.6935	6.48357	61	79.0492	5.03924
Capzb	2	123	65	62.2154	4.92036	58	64.0862	4.28893
Cks2	2	123	54	89.6667	6.51915	69	93.7826	5.86575
Polr1c	2	123	70	66.8143	4.72636	53	62.8491	5.31991
Ppa2	2	123	63	61.5873	4.33189	60	59.4	4.3628
Psmc3	2	123	61	71.3443	4.47513	62	78.4355	4.69887
Tpm3	2	123	64	61.8594	5.22622	59	61.4237	4.42657
Tubg1	2	123	62	100.774	6.70737	61	78.7049	5.28685
Atp6v1g1	2	122	65	80.5538	4.78444	57	81.193	6.48617
Bst2	2	122	52	85.8077	5.81857	70	85.6571	4.95654
Eif2s1	2	122	63	63.0317	3.44382	59	64.7288	3.98149
Fam50a	2	122	69	65	4.36605	53	76.283	7.24373
Galk1	2	122	47	78.5745	5.75812	75	65.44	3.28732
Gm28661	2	122	77	52.5844	1.56474	45	52.4444	2.10949
Hnrnpf	2	122	59	93	5.91455	63	83.381	5.56898
Mapre1	2	122	62	77.9032	5.63302	60	63.1333	5.47598
Rbm17	2	122	56	82.1429	5.05552	66	74.5	5.51679
Dek	2	121	58	71.1724	6.83281	63	55.5873	5.79787
Etf1	2	121	61	77.7049	6.196	60	69.0667	3.97093
Gm16286	2	121	61	69.2295	5.58338	60	70.45	5.27138
Klf6	2	121	78	78.2692	5.11102	43	78.2326	6.95725
Ppp1r2	2	121	70	73.2429	4.79589	51	79.5294	6.56716
Ppp2r5c	2	121	64	82.3906	4.58953	57	69.5789	5.79245
Rpl12	2	121	46	85.4783	7.53459	75	80.6667	5.26339
Rpl37a	2	121	57	93.5614	6.15862	64	76.5312	4.96634
Trir	2	121	59	71.8136	3.45817	62	75.5645	4.90787
Uba2	2	121	60	84.3	4.74461	61	67.4918	5.25249
Gja1	2	120	71	81.1972	6.77597	49	68.0204	6.37346
Myl9	2	120	68	96.5441	5.23535	52	87.7115	5.08757
Sugt1	2	120	62	72.6774	4.60922	58	65.4655	5.21541
Zrsr2	2	120	67	68.806	3.70482	53	73.7925	4.37128
Atp5f1	2	119	52	87.6731	6.42997	67	83.4179	5.9193
Ccdc47	2	119	65	69.1385	4.29349	54	69.2037	5.39581
Rab11b	2	119	60	86.5167	5.29489	59	71.5932	4.68999
Rad23b	2	119	62	79.1935	6.13293	57	75.5263	6.9093
Stub1	2	119	55	80.6364	5.93872	64	68.6875	5.89913
Anp32e	2	118	53	73.6792	5.01268	65	70.6615	3.97842
Cavin2	2	118	81	71.5309	4.47003	37	58.4324	5.97457
Cd9	2	118	66	103.197	6.1852	52	96.3269	6.52009
Cetn2	2	118	55	79.7818	5.19362	63	71.4762	4.55486
Cfl2	2	118	71	73.831	4.38103	47	86.7447	7.6045
Filip1l	2	118	57	73.1579	6.12358	61	55.2787	3.81936
Fkbp8	2	118	47	83.6383	7.18364	71	78.0141	4.45923
Mrps14	2	118	57	77.5614	5.53592	61	80.8197	5.78549
Ppm1b	2	118	59	74.6441	6.25342	59	64.6271	5.08751
Rcn1	2	118	56	75.9107	4.99963	62	69	5.02496
Ube2m	2	118	72	83.7361	4.75957	46	76.7609	4.43267
4833439L19Rik	2	117	53	77.2264	5.00072	64	78.0781	5.02014
Hprt	2	117	56	68.5	3.74923	61	76.1148	5.8744
Itgb1	2	117	66	101.939	6.33648	51	109.667	8.36548
Polr2a	2	117	54	76.5741	5.4957	63	68.5714	5.55091
Serinc3	2	117	66	95.4394	6.03503	51	78.1569	5.86103
Sh3kbp1	2	117	42	80.0714	5.93649	75	79.32	4.68132
Smim7	2	117	58	92.5345	6.33992	59	70.2712	6.1832
Uba3	2	117	65	76.5385	5.37754	52	74.3269	6.86534
Ube2i	2	117	57	80.6491	5.92746	60	75.6333	5.5713
Arl6ip6	2	116	62	65.4032	3.89345	54	66.3889	5.53381
Cav1	2	116	76	74.0921	3.81571	40	66.325	6.00181
Med21	2	116	68	33.8088	4.63094	48	23.625	2.7638
Pafah1b2	2	116	63	65.6984	5.16513	53	67.1698	5.80511
Snx7	2	116	61	71.3607	4.70095	55	66.6182	4.15696
Zfp207	2	116	57	81.9474	6.00607	59	79.0678	4.30721
Cnep1r1	2	115	58	78.069	5.59061	57	76.2632	7.53282
Mtch2	2	115	53	67.4528	5.25664	62	54.3065	3.06796
U2af1	2	115	63	95.7143	6.38673	52	76.7692	5.33241
Dbi	2	114	57	105.614	6.2309	57	95.4035	6.16371
Gnl3	2	114	60	65.9167	6.71062	54	77.3148	7.70076
Grsf1	2	114	60	78.55	6.30482	54	55.2778	4.53922
Hax1	2	114	60	74.0667	5.52976	54	65.0185	4.61891
Mcm2	2	114	67	95.9403	6.2158	47	86.1489	7.09337
Ppid	2	114	59	77.678	5.59386	55	71.4727	7.22753
Sfr1	2	114	57	65.0877	4.8023	57	62.8772	5.48318
Eif3h	2	113	56	73.5	4.68	57	74.8947	4.64808
Ipo7	2	113	55	49.4727	5.07568	58	52.3966	4.88147
Rhoc	2	113	50	83.3	6.12361	63	75.1746	5.13131
Snx6	2	113	62	75.6774	5.34598	51	72.9412	5.37851
Ift57	2	112	63	67.5397	3.98187	49	76.6122	7.5017
Kras	2	112	61	64.6885	5.21072	51	54.6275	4.01171
Pdlim5	2	112	67	78.8358	4.4561	45	77.5111	7.29062
Prpf38a	2	112	55	69.8727	5.51812	57	63.614	4.56051
Rpl7a	2	112	51	64.7059	4.32177	61	59.7705	5.13245
Rtn3	2	112	52	69.0962	5.23284	60	71.7167	5.37939
Slc25a3	2	112	68	89.9118	5.60712	44	92.8182	10.1284
Snu13	2	112	63	72.127	4.43062	49	65.6327	4.41399
Txnl1	2	112	58	73.3276	5.4648	54	65.6852	5.38967
Csnk1e	2	111	60	84.3167	5.24682	51	72.4314	5.64279
Fermt2	2	111	62	49.7581	5.29355	49	45.0408	6.89615
Pes1	2	111	66	93.697	5.02331	45	92.4889	6.86941
Tm9sf2	2	111	54	76.2778	5.21666	57	66.9474	4.73934
Tomm70a	2	111	55	83.1636	5.46616	56	78.0357	6.92295
Ak6	2	110	72	73.7778	4.00834	38	63.6053	5.92819
Cnn1	2	110	48	117.667	7.35551	62	83.2742	4.68704
Ddx3x	2	110	55	42.6182	4.18273	55	43.7091	5.99899
Esd	2	110	58	60.5	3.97205	52	60.4423	4.60828
Fstl1	2	110	60	63.9333	5.667	50	69.8	7.32027
Haus3	2	110	56	79.7679	5.20425	54	73.0741	4.91009
Hdac2	2	110	52	81.9615	4.94272	58	75.7586	6.09313
Ifrd1	2	110	64	68.4375	4.71419	46	60.6739	5.0549
Nifk	2	110	62	74.3871	4.76652	48	86.5833	6.84963
Ogfr	2	110	44	88.5909	6.69574	66	73.3788	4.18482
Serf2	2	110	55	90.2182	6.3914	55	67.7636	4.15636
AI506816	2	109	51	117.588	9.12867	58	99.6379	6.79497
Eif4a3	2	109	59	71.5085	3.74928	50	69	5.48139
Gm1821	2	109	53	86.3019	7.02164	56	88.9286	5.78372
Hadhb	2	109	57	86.9649	5.98603	52	84.0577	5.86639
Mcm5	2	109	59	74	4.59688	50	83.22	5.64498
Nudt5	2	109	49	69.0408	5.22449	60	62.3167	3.34917
Oat	2	109	53	95.434	5.56297	56	78.1786	5.74374
Sri	2	109	60	67.8333	3.82798	49	68.4694	5.24614
Srsf5	2	109	54	76.9074	8.77286	55	65.4727	6.82949
Ywhaz	2	109	57	90.7895	7.54111	52	63.1346	6.74822
Dbn1	2	108	45	97.3333	6.45134	63	89.381	6.12231
Kars	2	108	46	75.913	5.04402	62	79.3548	5.0753
Rab18	2	108	61	75.1311	5.65588	47	72.766	6.60337
Rab7	2	108	56	74.3393	4.80541	52	68	4.94848
Tmem59	2	108	61	71.8197	4.09623	47	73.7447	6.02428
Twist2	2	108	49	103.612	7.94813	59	82.0169	4.95452
Ewsr1	2	107	58	88.7414	7.18378	49	69.4694	6.52698
Gars	2	107	55	79.7455	5.27606	52	70.5769	4.67821
Hpf1	2	107	54	67.2407	6.12792	53	52.9245	4.0724
Hypk	2	107	54	87.6667	5.42634	53	88.0943	5.88741
Ndufs4	2	107	47	59.0638	4.5206	60	53.1	3.89699
Sf3b1	2	107	64	72.2344	5.17179	43	52.6047	4.92838
Aamp	2	106	51	81.5098	5.62983	55	79.2909	5.23862
BC005624	2	106	46	71.3913	5.54075	60	63.3	4.11746
Eif5	2	106	69	77.3478	5.4637	37	63.973	6.06629
Tbcb	2	106	56	68.4643	4.86305	50	67.68	5.10094
Dbf4	2	105	52	83	7.21351	53	74.566	5.48135
Gtf2e2	2	105	56	74.6071	5.14494	49	63.8163	4.9183
Pcbp4	2	105	45	98.1778	10.7302	60	85.7333	5.60371
Psmb1	2	105	44	72.4773	6.58397	61	60.3279	4.52541
Dnajc7	2	104	55	76.0727	5.65392	49	68.2857	6.11333
Gm20604	2	104	47	94.9149	8.13222	57	103.14	6.95248
Gmnn	2	104	53	79.2264	6.41013	51	86.549	6.48189
Hdlbp	2	104	46	105.957	7.79135	58	82.8448	5.3378
Mrps22	2	104	46	91.3913	6.71106	58	63	4.4057
Msn	2	104	54	91.3519	5.89838	50	91.16	5.51321
Psmb7	2	104	52	60.1731	5.28526	52	45.75	3.53123
Psmd3	2	104	48	88.875	6.42705	56	75.8214	5.0423
Ptbp1	2	104	47	91.6383	7.6294	57	80.4912	5.31762
Skp1a	2	104	49	98.9592	8.93626	55	93.5818	6.38188
Srsf7	2	104	58	71.0172	5.73319	46	65.2609	4.78798
Atad3a	2	103	58	84	6.00228	45	81.2222	6.33578
Bola1	2	103	63	74.6667	5.21558	40	62.175	4.45111
Cnn3	2	103	62	81.6935	5.1846	41	78.6585	7.64545
Jpt2	2	103	65	85	5.64441	38	79.1579	8.45614
Ruvbl1	2	103	53	82.6226	6.52351	50	82.42	7.46164
Csnk2b	2	102	55	67.8545	4.49046	47	64.6596	4.71979
Emc2	2	102	48	64.9583	4.89729	54	64.1667	3.45486
Hat1	2	102	45	88.1333	8.11562	57	68.7719	4.37416
Lamtor3	2	102	59	66.0508	4.8005	43	70.5581	5.69329
Pafah1b1	2	102	52	60.3462	5.47438	50	66.2	6.6213
Sf3b2	2	102	58	89.9138	6.59957	44	78.5	6.42877
Cald1	2	101	65	76.0308	6.12002	36	66.2222	6.86332
Ccnb2	2	101	57	96.4737	6.80051	44	81.9773	6.28733
Cse1l	2	101	60	67.7333	6.2565	41	57.4634	4.91778
Eif3g	2	101	50	75.7	6.2361	51	72.7451	7.86291
Med10	2	101	53	79.6792	6.39925	48	77.9167	6.56808
Nadk	2	101	58	79.1552	5.06056	43	78.4419	4.65712
Paics	2	101	55	86.4545	5.40271	46	75.7174	5.57079
Snrpa1	2	101	40	86	5.93138	61	76.9016	4.50797
Ssr1	2	101	52	91.6346	7.70576	49	86	7.69542
Sypl	2	101	64	66.7812	5.37947	37	66.5135	7.85521
U2af2	2	101	39	104.564	9.25941	62	90.6613	8.04035
Ghitm	2	100	55	85.2364	5.57645	45	82.4222	7.18507
Ly6a	2	100	35	102.029	6.50356	65	89.3692	5.30792
Prmt1	2	100	52	99.3269	7.19492	48	93.3125	7.60369
Rars	2	100	46	94.7391	7.62541	54	81.7593	6.75644
Rpl14	2	100	48	84.0208	7.28574	52	71.75	4.45705
Srm	2	100	53	87.2453	7.05069	47	60.5106	4.15377
Tcf25	2	100	41	67.2683	4.80024	59	76.322	6.02124
Ube2c	2	100	50	90.28	6.87128	50	76.92	5.783
Ap2m1	2	99	47	77.2766	5.51845	52	79.1538	6.09778
Dck	2	99	51	95.6667	7.61783	48	69.4375	5.23476
Gsn	2	99	57	87.8596	4.62675	42	85.9286	5.53636
Limd2	2	99	49	78.2653	6.0633	50	76.94	6.35795
Matr3	2	99	58	70.3793	5.50175	41	59.8293	7.73497
Med8	2	99	54	78.5741	7.99522	45	73.8	5.18494
Ostc	2	99	62	72.0806	5.08447	37	70.4865	6.53167
Pea15a	2	99	55	79.8545	5.56782	44	76.4773	6.58758
Ppm1g	2	99	47	81.7021	5.96048	52	81.9808	6.44036
Bub3	2	98	52	82.8846	5.44042	46	73.9565	5.81829
Eif3c	2	98	45	82.7111	6.36298	53	73.1509	6.05601
Gjb2	2	98	59	74.661	4.58446	39	68.6667	5.14271
Noc2l	2	98	49	83.9592	6.40315	49	86.102	6.55323
Parp2	2	98	52	71.2885	4.87782	46	75.913	6.86301
Psap	2	98	44	115.795	9.3704	54	99.3704	7.71857
Rer1	2	98	49	81.2653	5.13644	49	75.2857	4.7877
Rexo2	2	98	46	63.413	4.31636	52	67.1923	4.57313
Sar1a	2	98	54	77.0556	5.60242	44	66.6136	4.52407
Tma7	2	98	43	74.2791	6.11485	55	58.5091	5.41213
Akr1a1	2	97	53	73.1321	4.39514	44	79.75	5.76961
Fez1	2	97	55	80.3273	4.86574	42	77.6429	7.92488
Lsm8	2	97	46	73.6522	4.72427	51	67.3922	5.02673
Mrpl11	2	97	40	68.275	6.36848	57	69.193	4.67763
Ska2	2	97	49	94.7755	7.45701	48	95.9583	12.4225
Smc6	2	97	50	67.86	5.43014	47	74	7.86049
Sumo3	2	97	38	73.4737	6.34322	59	68.4746	6.67665
Tmem258	2	97	45	96.6889	8.16701	52	73.5577	4.37477
Yrdc	2	97	48	84.8542	4.85832	49	90.1429	6.06277
Atad1	2	96	53	80.7547	5.55121	43	68.4651	5.45202
Chchd3	2	96	53	71	4.74677	43	59.0465	3.2135
Eif3j1	2	96	40	82.475	6.18637	56	57.375	3.27537
Gpx4-ps2	2	96	48	87.5625	7.68046	48	65.2292	4.98481
Mybbp1a	2	96	55	87.5455	7.28194	41	83.2195	6.77764
Nde1	2	96	49	77.1633	4.99207	47	87.0851	6.9102
Rpl39	2	96	56	88.875	7.75259	40	79.35	7.53828
Sdf4	2	96	52	82.1538	4.73252	44	74.9545	5.09496
Tm9sf3	2	96	51	59.9804	6.52523	45	52.7333	6.75529
Tmem109	2	96	52	92.5577	6.10433	44	89	7.88083
Uqcrb	2	96	53	82.7925	7.59566	43	72.5814	6.44553
Arf3	2	95	51	107.588	8.55209	44	80.9545	7.06778
Dars	2	95	44	73.0682	5.70001	51	58.4314	4.54422
Ebpl	2	95	49	75.2857	5.9991	46	69.2391	4.76243
Nae1	2	95	46	73.5	6.88981	49	62.5102	5.63288
Prelid1	2	95	31	92.9032	5.91729	64	73.7031	3.29904
Ptpa	2	95	45	106.378	6.94936	50	93.04	5.51681
Rdx	2	95	55	66.6	5.10916	40	53.725	5.1782
Rrp1	2	95	42	72.7619	5.39093	53	74.6415	6.6047
Tmem167	2	95	47	86.5319	6.43728	48	81	5.65777
Arl1	2	94	47	70.234	4.86255	47	64.0213	4.27924
Dlst	2	94	55	89.0727	6.62352	39	76.4872	8.11763
Fam32a	2	94	52	85.0577	7.14947	42	80.619	7.96399
Fam3c	2	94	52	71.25	4.78834	42	81.0476	8.91837
Mtdh	2	94	46	74.087	7.19291	48	53.8333	4.39671
Ppp2r1a	2	94	43	100.256	10.1079	51	98.5686	6.48301
Trmt10c	2	94	48	69.3333	4.18696	46	60.6522	4.27053
Ap3s1	2	93	44	74.1136	5.26834	49	72.5306	4.71611
Lxn	2	93	55	66.4909	4.58549	38	69.2368	6.757
Map1lc3b	2	93	48	70.5833	4.97047	45	71.1778	5.12975
Nedd8	2	93	49	76.4286	5.96561	44	67.3864	3.24343
Nelfe	2	93	51	69.1373	5.47512	42	59.4048	4.51001
Rab21	2	93	46	69.2391	4.58909	47	87.1915	7.39206
Rbpms2	2	93	43	89.5581	6.44335	50	68.58	4.33784
Rnps1	2	93	54	84.6852	5.15719	39	85.0769	5.81734
Rpl22	2	93	45	91.0889	8.44443	48	87.7083	8.2782
Aimp2	2	92	47	98.4468	7.55411	45	79.8222	7.31089
Elk3	2	92	37	65.2432	7.32032	55	75.5455	7.33103
Fam120a	2	92	43	66.3953	7.7694	49	61.5102	7.62889
Lsm4	2	92	51	72.5294	5.44359	41	71.3171	5.16906
Mrpl15	2	92	46	60.7391	6.19839	46	57.6087	4.5107
Ndufs2	2	92	50	83.7	6.16456	42	69.3095	5.88307
Prss23	2	92	53	77.3774	5.58167	39	80.5385	6.08863
Rps21	2	92	40	113.45	6.76581	52	93.5385	5.81122
Thbs1	2	92	59	124.068	6.51958	33	92.0909	9.64792
Tmbim6	2	92	40	74.175	5.69615	52	63.0192	4.4844
Aida	2	91	36	84.7222	9.16268	55	53.6182	6.05411
Asna1	2	91	47	79.4681	5.97133	44	78.0227	7.10535
Bcl7c	2	91	40	78	6.09969	51	70	4.1024
Calm3	2	91	43	97	6.86161	48	90.1042	6.49287
Capza1	2	91	51	70.1176	7.13562	40	59.325	7.27516
Cdkn2a	2	91	51	92.3922	6.44678	40	109.825	8.56416
Cited2	2	91	48	77.4375	6.58511	43	76.2791	7.24226
Dnajb6	2	91	50	77	4.95742	41	54.1463	4.57245
Ppig	2	91	49	63.1429	5.8581	42	73.3571	7.82307
Tomm20	2	91	52	75.4423	6.46236	39	74.0769	6.55081
Eif3d	2	90	47	73.9362	6.41908	43	73.7674	6.16124
Nans	2	90	44	76.8864	6.01713	46	96.0435	11.616
Psmb3	2	90	39	85.8462	7.87497	51	68.9412	4.83017
Trp53	2	90	35	101.514	10.2214	55	115.636	17.9711
Aco2	2	89	38	90.3158	5.68154	51	78.2353	6.41657
Bccip	2	89	47	82.7021	4.91668	42	72.6667	5.8243
Gart	2	89	46	80.3696	6.58824	43	71.8837	5.43054
Gpx1	2	89	49	78.2041	5.47243	40	74.475	6.2513
Khdrbs1	2	89	46	71.913	5.0728	43	61.5116	6.04055
Pfdn1	2	89	48	75.0833	5.30779	41	72.0976	6.36541
Poldip2	2	89	48	77.3333	4.45661	41	62.9756	4.63293
Prpf19	2	89	46	96.087	7.35816	43	88.7907	7.40686
Rnf187	2	89	40	75.475	5.07136	49	70.2041	4.85405
Tnks2	2	89	47	76.8723	5.46801	42	77.2619	7.06321
Tomm22	2	89	47	85.1064	7.84003	42	68.3571	4.92849
Vdac2	2	89	51	67.6863	4.34096	38	68.7105	4.9121
mt-Ts1	2	89	53	74.8868	5.66595	36	68.0833	3.49876
Ctbp1	2	88	45	82.8	5.23234	43	82.6279	7.68132
Dcaf13	2	88	43	70.8372	6.78822	45	50.2222	3.96377
Fxr1	2	88	42	60.5714	5.14904	46	75.5217	6.41203
G3bp1	2	88	41	101.683	8.20633	47	94.617	7.08422
Gcsh	2	88	46	75.8043	5.91389	42	80.9286	6.60948
Idh3a	2	88	51	78.7647	5.43704	37	73.6216	6.1641
Melk	2	88	46	87.1522	8.43725	42	73.4286	7.25875
Phlda1	2	88	55	73.2364	7.39037	33	63.2121	7.29287
Stmn1	2	88	40	79.85	5.61956	48	80.2917	4.57821
Tonsl	2	88	38	77.1316	6.38354	50	83.14	7.34793
Tspan3	2	88	47	80.617	6.35266	41	71.1707	6.02255
Drap1	2	87	47	72.0426	4.45296	40	63.8	4.9223
Eny2	2	87	45	69.6	4.89529	42	70.8095	5.84117
Glrx5	2	87	49	101.286	6.94514	38	71.9737	4.08658
Id3	2	87	44	95.5455	8.20026	43	85.3023	6.17042
Kcmf1	2	87	42	81.0476	8.42366	45	71.1778	5.97586
Ndufab1	2	87	40	91.85	7.27165	47	68.2553	4.57397
Sf3a3	2	87	46	86.587	5.92235	41	88.7805	7.79737
Uqcrc2	2	87	46	63.9348	4.71257	41	58.9024	5.9829
Akt1	2	86	43	80.093	5.3476	43	82.7907	8.07305
Atp5h	2	86	40	91.75	8.06418	46	71.413	6.46691
Bcas2	2	86	41	80.0732	6.13311	45	75.4667	6.89051
Grn	2	86	41	94.1951	7.48603	45	91.4667	7.21888
Ndufb5	2	86	41	84.7805	7.24916	45	79.4444	6.87199
Pgam5	2	86	51	74.2941	5.59441	35	70.1429	7.50501
Prdx5	2	86	45	80.6667	5.42541	41	71.5122	5.59331
Rrm1	2	86	47	88.7447	5.64848	39	80.3077	5.71066
Slc25a5	2	86	43	86.4419	6.71085	43	83.2558	5.22093
Thyn1	2	86	44	68.6818	5.24028	42	65.5714	5.22239
Txn2	2	86	44	77.4545	4.11777	42	79.3571	6.53976
Eid1	2	85	45	81.1778	6.25217	40	75.05	5.70427
M6pr	2	85	34	76.1765	7.04993	51	63.4706	4.69454
Sfpq	2	85	36	80.0556	8.95056	49	72.7959	7.92068
Sh3glb1	2	85	50	70.34	4.74524	35	83.8571	6.35265
Ssbp1	2	85	42	55.2143	4.05609	43	56.6744	3.61951
Tmco1	2	85	45	76.8889	5.79009	40	71.725	5.73999
Ube2b	2	85	51	73.6275	7.64917	34	70.9412	7.64796
Zc3h14	2	85	50	71.54	6.09171	35	69.3714	5.37797
Actn4	2	84	44	75.2045	5.64356	40	71.95	8.11441
Adh5	2	84	39	55.4103	4.8157	45	54.9556	4.59565
Aprt	2	84	43	82.6977	6.39484	41	75.9512	5.71918
Asah1	2	84	46	75.4565	8.59175	38	68.4211	8.91423
Clta	2	84	46	76.8913	5.76282	38	84.8158	6.1838
Cox8a	2	84	34	100.029	9.18801	50	88.58	6.18224
Dnajb14	2	84	44	195.182	14.3395	40	188.8	17.0622
Eloc	2	84	45	72.4444	5.49573	39	76.0513	8.29803
Fam103a1	2	84	38	64.9737	4.98717	46	60.5217	4.45602
Fubp1	2	84	43	73.6047	7.71358	41	75.7561	7.84409
Polr2g	2	84	39	86.3846	7.31265	45	69.6	5.3098
Ppa1	2	84	39	75.9744	8.49043	45	64.8444	4.27233
Rpf2	2	84	45	69.9111	6.66117	39	60.8974	5.2034
AC160336.1	2	83	49	95	7.91753	34	95.5882	9.15392
Ctps	2	83	42	89.3333	7.58248	41	76.561	6.1117
Dpysl3	2	83	48	86.7083	6.01834	35	80	7.71439
E2f4	2	83	40	69.825	5.68033	43	72.9767	6.53116
Hcfc1r1	2	83	42	80.8095	5.78873	41	84.3902	6.88772
Ruvbl2	2	83	36	81.7222	6.00933	47	84.8723	8.77229
Srp54a	2	83	37	84.4595	6.56201	46	61.3261	4.98657
Usmg5	2	83	41	94.439	7.15512	42	80.4524	6.79421
Zmat2	2	83	42	64.6905	3.98957	41	68.5122	4.84564
Cavin1	2	82	37	81.2162	7.03514	45	108.333	7.93199
Cox7a2	2	82	35	74.7143	6.00525	47	64.9362	4.17514
Fhl1	2	82	47	102.064	9.98153	35	87.2857	8.66507
Mtpn	2	82	42	60	5.79164	40	51.35	5.97166
Naa50	2	82	44	85.2727	8.3723	38	64.6053	7.18518
Psmd4	2	82	37	87.8378	7.86422	45	50.3556	3.75367
Psph	2	82	28	91.6071	7.29889	54	76.537	6.40552
Selenok	2	82	43	93.7674	7.38853	39	76.7949	6.70347
Snrnp40	2	82	47	74.9149	5.90224	35	71.4857	6.52885
Spcs1	2	82	48	70.375	5.24898	34	72.8529	6.29152
Hells	2	81	50	71.46	6.414	31	54.3226	9.43518
Impdh2	2	81	48	83.1458	6.07962	33	65.1818	4.65059
Mrpl20	2	81	28	91.75	7.46311	53	83.717	6.39689
Nup107	2	81	48	85.875	7.41752	33	82.9697	7.98891
Rps25	2	81	36	96.4722	8.17653	45	71.3111	4.82307
Timm44	2	81	35	101.857	9.24127	46	93.4565	6.82537
Ube2j2	2	81	39	121.923	11.5291	42	92.4048	6.08677
Arhgap11a	2	80	46	71.3261	4.73525	34	69.2941	6.3556
Atf1	2	80	40	73.375	5.73255	40	65.05	5.3342
Cdk11b	2	80	42	129.19	10.868	38	94.1053	9.38429
Eif3l	2	80	40	83.575	5.74314	40	99.425	9.48676
Erp29	2	80	50	76.08	5.62572	30	58.2333	5.15292
Htatsf1	2	80	34	69.7059	7.03802	46	76.1304	6.22845
Ostf1	2	80	37	73.8378	6.28255	43	61.2326	4.96138
Prdx4	2	80	37	66.8919	5.62938	43	64.5349	6.3327
Rab11a	2	80	52	70.6346	4.24168	28	67.7857	6.85628
Racgap1	2	80	35	78.2857	8.21691	45	73.3111	7.12913
Rad23a	2	80	48	52.7083	6.88282	32	56.0625	7.40275
Rpl10	2	80	34	74.8824	5.52421	46	65.3913	6.83518
Rpn2	2	80	40	92.175	6.50969	40	84.625	6.12318
Rsrc2	2	80	38	64.7368	6.05797	42	54.3571	5.8935
Sucla2	2	80	42	63.2143	5.01738	38	61.1053	5.56102
Bnip2	2	79	38	91.4211	8.20113	41	82.561	7.69728
Brk1	2	79	48	86.8333	4.37771	31	77.5161	5.09185
Cby1	2	79	42	100.952	6.97143	37	87.9459	6.07777
Col1a2	2	79	40	97.05	7.82224	39	89.5385	9.17833
Coq10b	2	79	47	75.0426	7.72431	32	64.1562	5.43734
Ezh2	2	79	38	73.6579	8.59317	41	69.9024	5.76908
Psmd7	2	79	40	62.7	4.70441	39	59.9487	4.55299
Rcn2	2	79	37	96.7568	9.9262	42	73.5	5.49244
Tma16	2	79	42	76.881	5.28477	37	68.1622	6.10003
Cav2	2	78	52	40.0769	4.27692	26	47.3846	7.37942
Ctsb	2	78	40	77.85	7.20031	38	88.7105	8.64512
Gas1	2	78	41	91.3659	6.93522	37	70.1622	6.1114
Map2k2	2	78	44	85.0909	9.88084	34	71.7353	7.25348
Ndufs7	2	78	33	106.636	15.1397	45	76.4667	6.22227
Nmt1	2	78	42	62.6667	5.35409	36	55.4444	6.226
Psma1	2	78	35	67.1429	5.35135	43	74	5.48591
Rpl13	2	78	38	95.4737	7.07212	40	69.925	5.09833
Sar1b	2	78	44	67.6364	4.31293	34	63.0588	5.49157
Suv39h2	2	78	39	69.2564	5.29706	39	62.641	6.48971
Wdr1	2	78	47	107.468	7.42763	31	88.6129	6.86145
Canx	2	77	43	79.5814	7.64053	34	82.7059	10.3031
Card19	2	77	34	105.471	9.19297	43	84.4186	5.98694
Cenpa	2	77	38	75.7632	4.56811	39	70.5128	5.53512
Chmp3	2	77	47	80.0638	5.58172	30	81.1333	5.88817
Cox5a	2	77	45	66.1778	4.90264	32	63.4688	4.68166
Fam49b	2	77	35	63.7143	4.06791	42	76.4524	5.28659
Gm44510	2	77	43	86.8372	7.37234	34	107.206	10.2667
Gmps	2	77	40	65.35	5.46895	37	61.0541	4.79102
Hgs	2	77	38	86.3158	8.85229	39	79.8205	6.41352
Ipo5	2	77	41	108.683	9.40638	36	77.4167	8.18869
Kansl2	2	77	41	78.122	7.8489	36	85.5	8.99567
Nucb1	2	77	39	107.795	7.86985	38	98.8684	7.07304
Pbk	2	77	40	61.675	4.64844	37	84	6.36898
Pdhb	2	77	45	70.8222	4.93036	32	61.9375	5.14078
Phpt1	2	77	25	86.4	7.14714	52	68.1346	4.76993
Pop4	2	77	33	68.7879	6.16572	44	70.8636	5.10677
Serp1	2	77	37	69.8919	5.08163	40	71.8	6.76731
Slc39a7	2	77	35	81.5143	6.81863	42	74.2857	7.73222
Smoc2	2	77	59	92.7797	6.34655	18	77.2778	10.6678
Tjp2	2	77	34	64.3529	6.22139	43	82.1163	6.52384
Tmem126a	2	77	38	56.3421	4.74769	39	58.8205	5.08739
Aars	2	76	38	76.3684	5.80422	38	76.6316	5.78605
Atp6v1e1	2	76	32	87.3125	5.20187	44	76.4091	5.76084
Cops2	2	76	34	61.7353	6.39803	42	60.9286	8.02529
Fkbp2	2	76	39	67.0513	8.42353	37	61.8919	5.69941
Kdm2a	2	76	38	94.9211	9.28544	38	102.526	8.90335
Memo1	2	76	36	75.0556	6.59053	40	77.55	6.03541
Mthfd2	2	76	40	88.7	8.22794	36	73.3889	7.19935
Nptn	2	76	32	75.5312	8.41977	44	82.7273	9.07415
Nuf2	2	76	33	68.2121	5.61281	43	66.3023	5.31145
Oaz1	2	76	35	77.3429	5.41215	41	88.9268	6.78657
Pdcd6ip	2	76	44	78.1364	8.31524	32	97.4375	11.3588
Ppp2r2a	2	76	43	73.0698	6.31903	33	61.2424	6.39689
Rps15	2	76	37	89.2432	7.28552	39	77.3333	6.26548
Tnk2	2	76	43	94.907	8.09241	33	93.303	7.56065
Trim28	2	76	38	88.9211	7.16335	38	89.9211	7.16054
Usp1	2	76	43	64.6744	5.76507	33	59.4242	7.48884
Cpsf6	2	75	41	73.6098	5.87991	34	65.8824	7.22713
Cuedc2	2	75	35	83.3143	5.05396	40	73.325	6.03887
Eif1a	2	75	38	66.2895	5.37138	37	76.8919	8.47501
Gspt1	2	75	48	89.9167	6.02316	27	63.963	4.95812
Loxl1	2	75	38	86.9737	7.09878	37	80.3243	7.76791
Mrto4	2	75	38	106.895	10.7039	37	71.8919	6.22746
Prim1	2	75	34	59.6176	5.19299	41	75.1951	8.23049
Srp68	2	75	29	66.3448	6.36976	46	73.4565	5.28254
Aplp2	2	74	43	92.0465	6.46687	31	71.7097	8.01185
Atp6v1c1	2	74	42	73.4524	7.95888	32	65.9062	9.98342
Csrp2	2	74	36	67.25	5.16971	38	74.2632	7.72463
Ergic3	2	74	30	81.8	8.43951	44	86.2045	5.87135
Fam91a1	2	74	39	73.9231	7.64347	35	59.7714	6.98419
Gm6169	2	74	37	69.9189	6.10133	37	67.5676	6.99071
Hmbs	2	74	36	68.25	7.0819	38	67.9211	5.25965
Ktn1	2	74	39	69.6923	5.28705	35	69.5429	6.46325
Mfsd10	2	74	39	87.6154	7.06229	35	82.7429	6.24262
Mzt1	2	74	40	92.675	7.99073	34	81.7941	6.72672
Nup188	2	74	43	88.0698	7.03037	31	80.871	6.74598
Ube2e3	2	74	34	77.9412	6.79201	40	81.375	7.8187
Utp11	2	74	42	72.6905	5.10685	32	76	9.15684
Actr10	2	73	39	72.9487	6.30195	34	71.0294	8.29803
Adss	2	73	37	66.5676	5.24346	36	74.9722	6.7397
Ap3m1	2	73	36	56.6389	6.56298	37	60.4054	7.52522
Chtop	2	73	39	74.2564	5.2404	34	85.3824	9.9787
Commd8	2	73	35	67.2857	5.07552	38	65.7632	6.13259
Cttn	2	73	46	103	9.31283	27	112.926	12.8331
Cyp51	2	73	41	75.1951	5.7717	32	76.375	7.20985
Ddx1	2	73	33	61.0606	6.48427	40	60.9	4.32316
Dynll2	2	73	36	66.5	5.40654	37	73.9459	6.39439
Gtpbp4	2	73	37	67.2703	7.38453	36	55.2778	6.78103
H2afy	2	73	33	77.2121	5.54185	40	78.45	8.39099
Mcm6	2	73	30	90.9333	8.03007	43	73.5814	5.65563
Mrpl9	2	73	35	83.4286	6.38011	38	64.6579	5.41521
Nsmce4a	2	73	36	69.1111	5.19879	37	77.7027	6.17872
Ntan1	2	73	36	72.5833	6.52102	37	67.7027	6.42901
Rbm39	2	73	41	62.4878	6.8305	32	60.1875	9.94717
2019-09-02	2	73	37	91.8108	8.09448	36	80.5	8.35086
Shmt1	2	73	37	70.4054	5.23745	36	88.7778	15.3997
Tcf3	2	73	38	92.0789	6.66308	35	87.0286	6.62407
Tmem33	2	73	37	58.7027	3.75138	36	61.2778	4.56412
Tmem50a	2	73	35	72.8857	4.71554	38	66.5263	5.90703
Tuba1c	2	73	39	96.5128	7.4281	34	86.0882	6.50278
2810025M15Rik	2	72	32	82.75	8.38665	40	74	6.02215
Cenph	2	72	47	56.4894	4.57035	25	62.68	5.98765
Ehmt2	2	72	42	72.881	5.11436	30	81.0667	8.21826
Exosc8	2	72	38	64.8421	5.60798	34	64.1765	5.5711
Fh1	2	72	35	61.6857	4.21519	37	61.6757	5.01831
Gnai3	2	72	39	64.7436	5.44287	33	70.0909	6.84142
Gtf2a2	2	72	35	74.0571	5.41757	37	66.4054	6.5493
Jdp2	2	72	33	28.2424	6.93258	39	23.4103	4.86987
Nt5c	2	72	36	76.0556	7.1344	36	69.9167	5.38665
Prdx6	2	72	35	85.0286	6.79706	37	77.2703	6.78272
Slc29a1	2	72	32	91.2812	8.11432	40	87.95	6.08943
Slc9a3r1	2	72	40	93.9	6.70753	32	82.6875	6.20727
Srprb	2	72	34	80.4412	6.73667	38	72.3947	4.80601
Srsf2	2	72	42	81.0238	7.54334	30	70.6333	8.67391
Utp14a	2	72	41	82.0976	6.73982	31	68.7419	7.21485
Aasdhppt	2	71	40	70.8	4.85376	31	82.4516	8.94716
Arpp19	2	71	42	73.2381	6.37898	29	80.6897	9.76856
Cnih1	2	71	37	75.1081	6.11537	34	71.5588	7.14012
Cpe	2	71	36	137.889	12.4666	35	114.886	10.0556
Eif2b5	2	71	38	89.7895	6.66618	33	80	7.50831
Fam92a	2	71	38	79.5789	6.66446	33	82	7.87809
Gm10320	2	71	37	111.595	8.37502	34	81.7353	6.09871
Heatr5a	2	71	46	92.7609	7.62639	25	96.68	11.3125
Hist1h2bc	2	71	38	89.5789	8.34651	33	91.3636	8.13859
Mak16	2	71	36	61.1667	4.90032	35	68	7.50901
Rcc2	2	71	42	83.6667	5.44032	29	76.3793	8.6601
Rrbp1	2	71	36	81.0556	6.55025	35	79.1429	6.79125
Rrm2	2	71	29	97.7931	10.3177	42	81.5	7.4395
Sec11a	2	71	27	58.963	4.7458	44	66.75	4.62455
Tmed10	2	71	34	86.8529	8.40478	37	89.9459	13.4422
Trap1	2	71	41	86.5366	6.02119	30	83.5	7.79868
Arl6ip5	2	70	40	82.05	7.06611	30	56.9	2.94594
Col5a2	2	70	37	116.541	10.8982	33	89.0303	9.05138
Ehd2	2	70	35	80.6	7.43112	35	85.9143	7.98063
Glrx3	2	70	46	78.5217	6.8045	24	67.7917	6.81246
Gsto1	2	70	32	65.4688	5.52833	38	59.6842	6.00428
Gtf2b	2	70	44	86.2955	10.5635	26	59.0385	5.88386
Gtf2h2	2	70	32	68.5	6.50075	38	64.2632	5.57618
Hspa1b	2	70	37	106.676	7.51809	33	91.2424	6.46329
Klhdc2	2	70	28	73.9286	6.67713	42	53.1667	4.35225
Pabpc4	2	70	38	85.7895	9.10071	32	82.8438	8.56491
Pfdn4	2	70	42	76.4048	7.04746	28	78.0714	12.9056
Ppp4c	2	70	39	103.641	8.46476	31	88.1935	7.10153
R3hcc1	2	70	35	68.8	6.68117	35	56.5143	3.73541
Rab1b	2	70	36	80.8889	6.1865	34	80.2353	5.50355
Rtca	2	70	32	75.5	8.47123	38	64.3947	4.61923
Sec13	2	70	40	87.35	6.09637	30	73.1	7.76965
Slc35b1	2	70	28	60.75	6.01096	42	72.6667	5.38208
Tbrg1	2	70	28	68.2143	6.84138	42	66.7857	7.3546
Vps26a	2	70	42	88.9762	8.08322	28	61.8571	6.04083
Abce1	2	69	31	69.0323	10.1108	38	56.0263	6.59939
Cenpb	2	69	31	76.2581	5.01028	38	76.7632	4.93355
Flot2	2	69	38	74.1579	6.46325	31	79.2581	8.66475
Gkap1	2	69	34	73.2059	6.26916	35	67.1429	6.6207
Hars	2	69	36	76.8056	7.38866	33	74.1515	6.63949
Mpp1	2	69	37	71.7838	6.06179	32	59.3125	5.66745
Nol7	2	69	38	78.8684	8.37538	31	83.4516	8.40232
Nup88	2	69	39	87.1282	6.81754	30	69.9	5.83178
Pitrm1	2	69	33	77.8182	6.5064	36	65.8056	7.00912
Sdhd	2	69	37	78.1081	7.32525	32	66.875	6.99564
Socs6	2	69	29	70.1379	7.81607	40	62.725	6.97621
Zfp706	2	69	33	71.8485	6.4274	36	76.0556	6.24178
Capns1	2	68	29	96.5862	9.19281	39	83.0256	5.98623
Cdkn2c	2	68	29	96.1379	8.77974	39	89.5641	7.17223
Copg1	2	68	32	84.5	7.60795	36	78.7222	8.4434
Ftsj3	2	68	42	73.119	5.11458	26	63.3462	5.70398
Gins4	2	68	26	72.9231	8.65426	42	61	6.0135
Gm21982	2	68	30	86.0333	7.39767	38	83.6316	9.08504
Idi1	2	68	42	88.0714	7.4747	26	84.9231	7.21744
Immp1l	2	68	29	71.1724	5.40974	39	66.0769	6.24425
Naa20	2	68	36	79.5	9.99386	32	89.2188	12.0951
Naa35	2	68	43	78.1163	4.74911	25	82.4	13.578
Raly	2	68	32	91.0938	8.25489	36	93.75	6.97088
Twf1	2	68	35	75.1429	7.04355	33	66.2727	6.34822
9530068E07Rik	2	67	35	60.3714	7.32946	32	52.5	7.1585
Ap2s1	2	67	31	74.1935	6.35597	36	66.3056	5.57605
Bin1	2	67	37	77.4054	6.29184	30	65.4	5.5228
Ebp	2	67	31	73.4839	6.85131	36	75.9167	5.90634
Eef1akmt1	2	67	41	69.0732	5.85675	26	57.0769	7.50206
Egr1	2	67	33	72.1818	8.12262	34	89.2353	11.0888
Ext1	2	67	28	66.1786	8.5464	39	52.6154	5.82764
Fyttd1	2	67	28	60.0714	9.63319	39	60.1538	6.8002
Gas5	2	67	36	105.278	9.82679	31	75.7742	8.98927
Gtf2f1	2	67	34	69.7353	7.76485	33	64.2727	7.72938
Irgm1	2	67	40	71.9	5.8712	27	77.1111	6.85362
Las1l	2	67	34	69.9706	6.58396	33	79.9091	8.0304
Mif	2	67	35	92.4857	7.3414	32	85.9062	8.2653
Naa38	2	67	30	75.0333	6.82503	37	63.5676	6.28313
Nob1	2	67	36	84.75	8.56595	31	72.9032	13.0771
Plk1	2	67	32	83.5312	7.67682	35	68.7429	5.58575
Ppp2cb	2	67	32	68.5	5.61736	35	66.9714	6.05262
Ppp4r2	2	67	35	91.5429	7.14461	32	92.625	9.87755
Psmd5	2	67	42	78.7857	6.58225	25	78.96	9.08317
Smc2	2	67	38	77.6579	9.60078	29	52.2414	9.92477
Srsf11	2	67	36	85.9167	12.573	31	69.8387	6.301
Ssr2	2	67	39	69.7179	5.05901	28	71.8929	6.01515
Tgoln1	2	67	33	80.6061	5.74879	34	82.6176	4.88537
Twist1	2	67	36	107.667	11.1355	31	72	5.46105
Txndc9	2	67	43	65.0465	5.84799	24	57.7917	6.52213
Vdac1	2	67	26	81.2692	6.46075	41	74.8293	5.48817
1700047I17Rik2	2	66	36	72.0556	8.38042	30	60.4	7.85092
Abcf1	2	66	29	88.6552	9.3991	37	77.027	5.61219
App	2	66	38	85.7368	8.96953	28	58.2143	7.61667
Bop1	2	66	33	76.7576	6.48202	33	69.6061	5.15043
Btf3l4	2	66	34	79.2353	7.57215	32	62.5312	5.50709
Ddb1	2	66	38	102.184	7.88551	28	90.1429	9.5455
Ier5	2	66	31	93.129	8.82584	35	94.9714	6.78913
Immt	2	66	27	67.1111	5.68186	39	75.2308	7.06227
Nudt21	2	66	30	83.2333	8.45625	36	77.25	5.72968
Nup62	2	66	25	90.52	9.14472	41	82.9024	6.13111
Pdcd5	2	66	21	65.5714	6.25772	45	72.2222	5.43613
Pin4	2	66	29	69.8966	7.48464	37	76.2703	6.16058
Pls3	2	66	38	70.7105	5.18814	28	72	8.32426
Psmc3ip	2	66	36	85.8611	6.99947	30	74.8667	6.85237
Rps19bp1	2	66	38	88.0789	6.65767	28	80.9286	8.25161
Smu1	2	66	34	60.1176	3.46204	32	64.4688	5.69522
Srpk1	2	66	32	76.375	7.09007	34	82.6765	9.50767
Tmem123	2	66	29	85	6.50912	37	72.6486	6.14735
Tspan4	2	66	37	73.973	5.69283	29	69.6207	5.43985
Acads	2	65	27	92.963	6.85025	38	83.8684	4.77864
Cenpk	2	65	41	72.2195	6.07425	24	53.9167	5.55838
Dync1i2	2	65	34	72.2059	8.74552	31	72.9677	10.1196
Eprs	2	65	29	57.4483	6.68193	36	64.0833	7.93632
Errfi1	2	65	34	72.9118	5.76521	31	68.2258	5.5254
Flnb	2	65	40	91.825	6.83089	25	96.96	10.3774
Fmr1	2	65	34	71.2941	9.17463	31	69.3871	8.56483
Foxp1	2	65	31	51.3226	9.92054	34	40.4412	9.40847
H19	2	65	28	73.9643	6.66767	37	88.8649	7.07759
Itm2c	2	65	33	70.9697	7.05293	32	71.2812	5.49436
Klc1	2	65	32	90	7.18764	33	92.303	9.92936
Marcks	2	65	43	79.8605	6.79656	22	82.3636	9.04432
Mtfr1	2	65	34	83.6765	9.14074	31	66.7419	4.89536
Ndufaf2	2	65	38	70.2632	5.71479	27	86.7407	10.5667
Nxf1	2	65	28	69.2143	7.70938	37	59.027	6.02824
Rala	2	65	34	66.5294	4.53366	31	75.8387	11.4675
Rnf11	2	65	35	67.3429	5.48838	30	71	7.15945
Rpl18a	2	65	33	76.9697	7.95597	32	68.0938	6.66913
Snrnp27	2	65	29	67.7241	6.67825	36	73.8611	8.86317
Tpp2	2	65	31	78.4194	7.57217	34	90.5294	8.10551
Uck2	2	65	39	65.5897	5.86667	26	68.3077	10.0403
Vmp1	2	65	27	73.6296	8.98576	38	98.5526	11.1259
Wls	2	65	30	88.7	10.0457	35	60.5143	7.20707
Zcchc17	2	65	32	69.8125	4.86546	33	68.5455	4.8504
Zfhx3	2	65	31	126.645	11.1915	34	123.382	14.3665
Ccl5	2	64	20	107.75	11.2499	44	98.4318	8.70869
Cnih4	2	64	26	53.9231	5.93503	38	52.5263	5.1459
Faim	2	64	34	59.9118	4.94824	30	59.8	5.94519
Gapdh	2	64	29	69.9655	5.62703	35	68.8	6.56084
Gins2	2	64	30	86.3667	8.50914	34	66.9412	5.81609
Ik	2	64	34	67.8824	7.15713	30	57.3333	5.27833
Mcm3	2	64	33	86.8788	8.85541	31	93.9355	9.27271
Mgp	2	64	40	97.7	6.31775	24	97.9583	10.0415
Rras2	2	64	36	87.0278	6.98074	28	70.25	6.99866
Smc1a	2	64	39	71.6923	7.07164	25	68.8	9.40893
Tor1aip2	2	64	33	85.4545	8.48572	31	75.6452	6.4093
Tpx2	2	64	36	73.5556	8.07187	28	78.1071	10.1948
Zfp36l2	2	64	44	68.9773	6.82496	20	79.6	10.7595
Atpif1	2	63	35	95.3429	8.80732	28	101.214	10.6655
Bclaf1	2	63	39	79.6923	7.24459	24	75.8333	11.8101
Cdca4	2	63	36	80.8333	8.68796	27	61.9259	7.43346
Cisd3	2	63	28	79.5357	7.10947	35	82.1143	7.57728
Ctsd	2	63	42	102.286	8.58275	21	82.7619	8.60151
Ezr	2	63	37	89.5405	7.62589	26	80.6154	9.06797
Fbxo6	2	63	33	86.0909	8.90779	30	77.8667	7.92573
Fundc2	2	63	38	64.2368	3.88039	25	74.64	7.32205
Hnrnph2	2	63	32	66.3125	7.11477	31	70.4516	7.13054
Leo1	2	63	33	80.3636	7.97653	30	76	8.79949
Mtap	2	63	36	82.6944	8.51839	27	59.0741	5.91224
Pno1	2	63	27	81.9259	6.70093	36	69.9444	5.10189
Samm50	2	63	23	75.2609	8.24305	40	68.65	6.47037
Sdc4	2	63	29	74.8621	9.32243	34	81.2941	10.2491
Sec63	2	63	29	85.4828	9.10993	34	68.2353	7.69432
Sf1	2	63	26	99.1154	11.3383	37	86.7568	9.27113
Srp19	2	63	25	71.56	10.7844	38	49.5789	4.59565
Syf2	2	63	26	67.3462	5.80831	37	66.1622	7.03736
Adamtsl5	2	62	26	93.3846	11.1224	36	80.3056	5.43122
Arcn1	2	62	34	78.5588	6.93634	28	58.9643	5.96492
Arl6ip1	2	62	32	88.375	6.96023	30	80.5333	9.64051
Cast	2	62	29	83.5862	8.6582	33	75.7576	8.99842
Crk	2	62	36	78.1111	5.86075	26	80.4231	11.8084
Eif4h	2	62	28	90.3929	8.53793	34	74.2941	5.06831
Emc7	2	62	35	70.7714	8.58913	27	78.5926	10.8303
Ergic1	2	62	34	83.9118	7.49271	28	68.8214	6.91494
Gatad1	2	62	32	69.5938	5.90598	30	74.5333	7.78299
Grcc10	2	62	29	84.2069	6.13975	33	65.3939	4.94041
Hmgn3	2	62	29	76.5517	6.48305	33	77.6667	9.1048
Hnrnpll	2	62	30	77.9333	7.01901	32	96.5	10.4477
Lonp1	2	62	37	95.2973	7.26528	25	70.96	5.25402
Mea1	2	62	35	100.971	9.77932	27	84.4444	8.88493
Minos1	2	62	34	87.1765	6.70878	28	67.8929	4.44161
Mxra8	2	62	34	84	9.87544	28	77.3214	5.8589
Nasp	2	62	33	67.4242	6.34948	29	70.7241	8.04416
Ndufc2	2	62	33	70.3939	6.67863	29	57.2759	5.68723
Nemf	2	62	30	69.4333	7.34101	32	55.75	5.95852
Nt5dc2	2	62	25	81.2	8.47339	37	82.7568	5.85762
Nus1	2	62	33	58.0303	4.88781	29	55.4483	6.81287
Pik3cb	2	62	40	108.5	8.33554	22	77.8636	8.30993
Rad51	2	62	31	83.8065	6.33761	31	81.4839	7.81629
Rangap1	2	62	33	83.8788	8.84337	29	66.9655	6.17626
Setd3	2	62	39	79.4872	8.42329	23	85.6522	9.34239
Tax1bp1	2	62	38	64.9737	5.82745	24	67.75	6.95303
Tead2	2	62	33	71.8182	7.68389	29	62.7586	4.35812
Utp3	2	62	31	68.4516	9.32496	31	50.2903	5.94007
Anp32a	2	61	38	84.5526	7.53365	23	82.2174	9.06935
Atp6v1f	2	61	31	85.129	7.6392	30	86.6667	6.4044
Bax	2	61	38	65.2368	5.52261	23	76	9.18987
Crtap	2	61	29	78.2759	7.69033	32	75.4688	7.4944
Ctnna1	2	61	28	69.8929	8.14636	33	71.6364	6.61826
Ddrgk1	2	61	32	71.0312	5.12852	29	67.6552	5.4877
Ddx46	2	61	35	86.2286	6.65954	26	88.1923	12.0176
Fam89b	2	61	26	74.6154	6.94166	35	81.4571	7.47811
Gm10273	2	61	25	58.08	5.63274	36	54.3889	3.91918
Gpi1	2	61	28	85.25	10.8339	33	77.5455	5.83836
Kif23	2	61	28	80	9.16376	33	66.4242	7.56254
Lmo4	2	61	44	61.9318	6.67845	17	54.8824	6.79756
Lurap1l	2	61	36	73.5556	6.1051	25	91.44	10.3627
Nacc1	2	61	33	106.152	12.9405	28	69.3214	6.07774
Nudt4	2	61	29	74.4828	8.07775	32	69.5312	8.18523
Pisd	2	61	27	101.556	11.8831	34	111.118	11.9593
Selenos	2	61	33	65.9091	6.17221	28	54.9643	7.18549
Stx4a	2	61	34	59.1471	5.40042	27	57.4444	5.66178
Tyms	2	61	30	78.7333	7.01901	31	81.2903	8.08979
Uqcrq	2	61	25	88.08	9.09099	36	76.3611	5.72992
Vamp2	2	61	36	81.3889	7.69733	25	98.52	16.361
Aig1	2	60	34	68.5294	7.62443	26	63.7308	7.26232
Arpc3	2	60	32	78.0312	7.18335	28	85.2857	7.49623
Casp8	2	60	26	63.9231	5.9078	34	59.4412	5.0431
Ccni	2	60	29	62.069	5.99106	31	70.7742	7.87701
Dhrs7b	2	60	30	72.3667	6.3867	30	68.5	5.40941
Eif1ad	2	60	25	66.28	7.16269	35	57.9429	5.09517
Grb10	2	60	36	102.167	9.48939	24	103.5	16.4042
H2-D1	2	60	24	106.333	13.1814	36	67.7222	6.30092
Llph	2	60	34	79.1176	8.04451	26	78.8846	9.3542
Mapk6	2	60	25	87.52	12.3362	35	73.8857	8.16011
Med30	2	60	34	76.5294	6.21476	26	78.0769	9.25253
Pimreg	2	60	22	93.9545	12.2804	38	94.5263	9.00867
Polr2f	2	60	32	92.4062	10.4265	28	66.1786	8.03183
Ptpra	2	60	25	92.04	8.60111	35	94.3143	8.62334
Sdc2	2	60	27	66.7778	7.93083	33	67.1515	7.60601
Snrnp70	2	60	33	94.3939	8.59367	27	90.7037	9.59535
Tars	2	60	39	81.7436	6.45917	21	84.8571	8.51949
Tk1	2	60	38	81.6579	7.13728	22	61.6364	6.08566
Topbp1	2	60	28	67.7143	7.68195	32	76.0625	8.20774
Vps29	2	60	34	63.4412	5.04927	26	76.3846	8.01941
Yy1	2	60	34	61.5	6.78733	26	55.0769	8.55472
Cdv3	2	59	35	73.2857	5.50659	24	81	9.253
Coro1b	2	59	31	72.5484	6.30409	28	67	5.48909
Cul3	2	59	36	64.5556	6.48115	23	63.7826	9.36146
Dad1	2	59	29	97.1379	10.8257	30	72.4667	7.4371
Ddx21	2	59	31	67.0968	6.68207	28	84.5357	7.25035
Eef1e1	2	59	30	104.767	15.9358	29	103.138	8.78867
Fam107b	2	59	31	64.9032	7.97438	28	77.7143	12.2522
G3bp2	2	59	31	67.2903	8.70169	28	74.9643	8.35981
Gm9774	2	59	28	83.4643	7.0978	31	82.6774	7.15975
Hbegf	2	59	37	85.4054	8.4219	22	73.8182	8.40445
Mdm2	2	59	35	62.7429	6.60591	24	61.375	7.91004
Pdha1	2	59	37	75.1081	6.67111	22	59.3182	4.75663
Phf10	2	59	27	73.2963	7.8289	32	49.625	3.76553
Rcl1	2	59	33	79.1818	6.84788	26	66.1923	6.32175
Sqstm1	2	59	24	81.7917	8.18195	35	80.0286	7.28381
Tes	2	59	32	78.25	8.57834	27	62.8519	4.84569
Tiprl	2	59	29	63.069	5.199	30	78.9333	7.04571
Tpd52	2	59	37	72.3784	5.82811	22	68.9091	8.4721
Tsen34	2	59	32	81.6875	5.62351	27	74.0741	4.84999
Ufc1	2	59	30	62.6	3.53321	29	71.8621	5.43795
Ufd1	2	59	19	67.2632	7.84329	40	65	5.187
Wdr89	2	59	29	102.759	8.43365	30	116.967	10.9326
Znhit6	2	59	32	78.1875	8.38926	27	54.2963	5.86024
Actl6a	2	58	31	70.5484	5.24981	27	57.5185	5.41637
Adat3	2	58	30	83.0667	5.32561	28	78.6429	9.29288
Anapc11	2	58	38	80.5526	6.94634	20	66.65	5.94023
Apba3	2	58	24	107.042	18.1504	34	72.5882	4.03641
Atic	2	58	28	81.3571	6.31774	30	85.5333	8.6538
Casp6	2	58	27	76.7407	6.03115	31	77.9032	6.51331
Cbx5	2	58	24	105.083	11.5498	34	85.2353	6.94716
Cdc20	2	58	33	94.5455	9.80584	25	94.28	10.2357
Cope	2	58	34	56.8235	4.34129	24	56.25	6.70205
Cox16	2	58	29	87.6897	10.9856	29	91.2414	10.373
Dctn2	2	58	30	87.1	9.6362	28	82.3214	8.56399
Fhl2	2	58	32	90.6875	8.88956	26	88.2692	6.62534
Hspb6	2	58	33	83.5455	6.49038	25	71.44	4.8501
Krt19	2	58	18	79	7.99228	40	62.475	3.64829
Mat2b	2	58	24	55.0833	7.9702	34	73.6471	8.33977
Nsmce1	2	58	26	80.2692	8.51427	32	64.5938	5.46685
Psma6	2	58	23	84.3913	11.5242	35	53.0857	4.15464
Ptges3	2	58	29	88.4483	7.48547	29	93.1034	11.3978
Pwp1	2	58	31	74.7742	4.83736	27	70.4444	7.91091
Rab8a	2	58	31	78.0323	6.10973	27	59.1111	5.72131
Rpl36al	2	58	24	75.5	7.99588	34	93.2941	9.70914
Slc3a2	2	58	23	92.3913	9.75401	35	89.2857	9.58141
Tgfb1i1	2	58	34	107.382	8.19011	24	90.8333	9.02151
Trpc4ap	2	58	32	80.6875	6.38333	26	94.5769	11.1686
Ap1m1	2	57	26	67.6154	5.04802	31	66.129	4.38419
Atp6v0c	2	57	29	90.7586	7.30052	28	82.8929	8.64527
Bhlhb9	2	57	24	75.1667	7.53157	33	74.6364	6.12493
Cebpz	2	57	34	53.5588	4.13655	23	74.4348	14.185
Copa	2	57	23	79.5217	8.19882	34	95.7059	9.89753
Eps15	2	57	26	65.8462	9.78628	31	62	8.183
Ing1	2	57	30	69.7333	7.12506	27	70.2963	7.81961
Nop14	2	57	27	70.6296	6.83113	30	78.0333	7.99159
Phax	2	57	32	69	7.89395	25	59.48	6.08003
Puf60	2	57	33	91.6667	7.12626	24	87.5417	9.79264
Rab10	2	57	30	57	4.02133	27	76.2963	9.31786
Rpl22l1	2	57	33	61.7273	4.72422	24	69.5417	10.761
Smarcb1	2	57	31	100.613	9.31668	26	78.3462	7.02298
Tcerg1	2	57	29	62.931	6.33881	28	60.9286	8.29862
Timm29	2	57	29	88.6897	7.68836	28	63.6786	10.1676
Tmed5	2	57	30	47.2	5.39473	27	38	5.56666
Vti1b	2	57	32	72.625	5.98692	25	58.88	5.0073
Wbp4	2	57	32	88.1875	7.55687	25	71	9.16515
Adk	2	56	28	78.5714	7.79152	28	73.1071	6.73995
Ahsa2	2	56	24	63.6667	7.53986	32	60.75	4.65824
Armcx2	2	56	35	83.3429	6.75893	21	77.3333	8.28088
Arpc4	2	56	29	88.7586	9.34039	27	71.1852	5.93426
Becn1	2	56	39	76.8205	8.34873	17	76.3529	8.36823
Cdc42ep3	2	56	36	88.4722	7.59004	20	75.1	9.7442
Eif3f	2	56	26	77.0769	8.06885	30	70.0333	5.19732
Eif4g1	2	56	32	82.4062	9.72511	24	103.292	11.1924
Gemin7	2	56	34	75.0294	5.43958	22	74.9091	10.231
Got2	2	56	26	68.5385	6.5593	30	78.6	6.24279
Hnrnph3	2	56	25	76.88	9.79344	31	54.8387	3.1289
Igf2bp2	2	56	28	62.8571	4.61992	28	47.5357	3.71994
Isy1	2	56	16	83.5	9.49301	40	77.25	6.20934
Lox	2	56	26	68.3462	9.53969	30	74.3667	12.3802
Mien1	2	56	25	84	7.79251	31	79.9355	6.88072
Nelfa	2	56	36	95.8889	9.43306	20	95.9	12.5036
Psmc4	2	56	26	73.2308	5.27198	30	66.5667	5.22296
Raver1	2	56	24	91.5	10.7898	32	86.2188	9.27906
Rbx1	2	56	28	84.5714	8.98417	28	82.1071	8.69661
Unc50	2	56	32	74.3125	7.9794	24	70.0833	6.57566
Atp5d	2	55	30	93.1	7.67729	25	84.24	7.99085
Ccz1	2	55	22	71.8636	8.01324	33	57.3333	5.34806
Cuta	2	55	32	76.9062	6.21527	23	74.8261	9.7867
D030056L22Rik	2	55	28	93.1786	8.99462	27	75.037	6.56036
Exosc3	2	55	31	72.129	6.39389	24	49.8333	4.25639
Fosl1	2	55	30	92.7	10.3643	25	85.08	9.30581
Gm8624	2	55	24	99.1667	13.0125	31	90.3226	9.76108
Grb2	2	55	31	72	6.32768	24	70.8333	9.03747
Klf3	2	55	37	75.2432	6.57412	18	73.6667	9.74046
Mbd3	2	55	22	83.2727	5.80118	33	75.7273	6.19847
Mgat2	2	55	26	62.9231	5.46801	29	75.2414	7.27393
Mgat4b	2	55	27	75.9259	7.48532	28	76.25	8.66285
Mns1	2	55	29	66.2759	5.64505	26	58.1154	5.11823
Ndufs6	2	55	21	94.5714	12.0282	34	64.7059	4.88917
Nfkbib	2	55	30	60.8667	4.81011	25	67.64	7.24936
Nme7	2	55	26	85.3077	11.5386	29	64.8966	7.64683
Pclaf	2	55	28	75.6786	6.99126	27	70.3333	9.02747
Pdia6	2	55	24	90.5	8.61805	31	89.1935	9.08217
Ppib	2	55	30	65.7333	6.37842	25	83	8.15588
Rcn3	2	55	28	89.4286	8.44043	27	76.8148	8.4425
Rnf4	2	55	34	83	8.98961	21	80.0952	11.9731
Sgms2	2	55	35	72.2571	7.69079	20	80.1	11.2029
Ska1	2	55	35	81.3714	7.54784	20	84.9	12.6901
Smchd1	2	55	24	92.375	7.80265	31	72.1935	6.51444
Tmem30a	2	55	31	61.2903	9.70525	24	59.0833	13.8141
Tmx3	2	55	27	54.2222	7.74301	28	53	8.70271
Uqcrh	2	55	26	96.1538	12.2339	29	79.4483	6.13398
Actr1b	2	54	27	77.963	6.96325	27	70.9259	5.19943
Aes	2	54	22	84.3182	6.45851	32	86.25	4.99531
Arpc5l	2	54	28	106.143	14.1732	26	93.6923	8.88116
Asns	2	54	28	78.5714	5.87159	26	85.5769	11.635
Basp1	2	54	26	60.1538	6.22713	28	48.7143	7.08816
Ciapin1	2	54	34	75.7941	8.84779	20	85.9	8.94676
Csnk1d	2	54	26	81.4615	9.12621	28	92.9643	7.70725
Dld	2	54	36	76.8333	7.77485	18	57.1111	8.67446
Eif3k	2	54	20	91	8.0762	34	66.8235	5.01373
Eif4ebp1	2	54	31	69.5806	6.68758	23	75.4783	8.09627
Glod4	2	54	30	57.7	5.71978	24	66.9583	5.02959
Gm27029	2	54	29	71.8966	6.86481	25	85.92	8.5497
Ipo11	2	54	26	61.0769	8.97167	28	67.7143	9.79482
Litaf	2	54	36	79.2778	7.53271	18	79.7222	12.0277
Lman2	2	54	24	91.0833	10.4937	30	93.7	11.2705
Mad2l1	2	54	26	84.6538	8.43316	28	81.3571	10.9041
Msto1	2	54	33	75.5152	7.11523	21	67.9524	5.93979
Ndufs8	2	54	21	79.2381	7.41479	33	91.9697	10.4151
Nop16	2	54	30	82.4	5.67717	24	84.1667	7.60475
Plk2	2	54	34	109.529	9.17027	20	108.5	9.70554
Pop5	2	54	32	65.625	6.03501	22	70.8182	6.58248
Ppil1	2	54	28	93.1071	9.22056	26	76.8846	6.15056
Prc1	2	54	26	77.7692	9.68273	28	66.6786	10.5576
Shisa5	2	54	38	97.5526	7.33476	16	70	10.3577
Smarca5	2	54	33	100.485	8.31487	21	68.3333	11.7784
Smim15	2	54	28	67.25	9.15744	26	48.3077	7.53783
Spryd7	2	54	35	70.7714	5.77851	19	67.9474	12.8564
Tbcc	2	54	30	93.1	8.80383	24	92.7917	8.30244
Tor1a	2	54	27	79.7778	9.3119	27	85.5185	9.87207
Txndc15	2	54	29	77.6897	7.3782	25	71.64	6.86833
Ube2s	2	54	36	92.7778	9.18509	18	76.5	8.99425
Ywhab	2	54	30	79	7.44551	24	84.5	10.759
Zc3h18	2	54	27	79.1111	8.53675	27	68.5556	7.08586
Anxa7	2	53	28	96.7857	9.15754	25	90.16	8.70047
Arl2bp	2	53	24	86.8333	11.5687	29	82.6552	7.96504
Atf4	2	53	27	108.37	11.5907	26	113.308	12.9425
Atp13a3	2	53	27	66.1481	9.01008	26	45.1923	6.46223
Copb2	2	53	27	69.5185	6.97406	26	65.9615	6.54716
Cox6c	2	53	25	94.8	8.45411	28	92.9286	8.10752
Ddit4	2	53	22	101.864	10.5647	31	87.0323	7.60244
Dnttip2	2	53	33	73.8182	9.84606	20	64.45	6.27355
Fam118b	2	53	26	72.5385	6.58046	27	61.6667	6.28212
Gabpa	2	53	26	76.5	7.25166	27	61.5926	7.10614
Galnt1	2	53	24	98.7917	17.5555	29	79.1379	10.2814
Golph3	2	53	37	71.5405	6.79595	16	76	12.0529
Ivns1abp	2	53	28	69.8571	7.19476	25	63.76	5.97335
Lix1l	2	53	31	95.5806	9.72117	22	80.1364	11.7709
Lta4h	2	53	20	74.3	10.301	33	58.8788	7.29086
Maged1	2	53	24	98.25	10.6442	29	104.931	12.6156
Pdk3	2	53	30	63.1333	4.69722	23	85.087	10.519
Rbm25	2	53	31	96.6452	10.3268	22	53.9091	5.78681
Rpl18	2	53	22	98.2273	16.8756	31	70.6129	7.8132
Scpep1	2	53	21	87.2381	10.9819	32	85.3125	5.45587
Sec31a	2	53	31	81.8387	6.93677	22	73.9091	10.5537
Sf3b4	2	53	31	92.2903	8.37421	22	85.5909	9.15944
Sptbn1	2	53	26	85.6538	13.339	27	90.4074	11.9636
Stam2	2	53	29	68.3793	6.30976	24	54	6.84374
Tbp	2	53	27	65.8519	5.04322	26	67.7692	8.63379
Tbx15	2	53	26	62.9615	7.93436	27	62.9259	8.20601
Tex30	2	53	35	71.7714	7.78089	18	58.2222	7.6886
Thop1	2	53	21	85.1429	8.66151	32	80.375	6.45942
Tmem234	2	53	27	75.5556	7.4562	26	66.5	7.76395
Usp14	2	53	19	92.7368	9.07367	34	54.3235	9.05096
Zfp664	2	53	22	61.9545	7.77697	31	57.2581	7.69515
Arfip1	2	52	28	80.4643	10.3361	24	56.625	6.78151
BC031181	2	52	27	74.4815	7.29571	25	67.76	7.11759
C330027C09Rik	2	52	27	70.8519	10.2225	25	76.28	7.90555
Comt	2	52	25	112.6	15.2985	27	102.778	13.5551
Gm43796	2	52	28	92	6.92341	24	72.2917	8.3203
Gstm5	2	52	24	75.4167	7.55142	28	60.7143	6.28548
Hectd1	2	52	30	87.2	7.16619	22	75.2273	9.27694
Ifitm3	2	52	23	97.1304	8.73649	29	68.4483	7.02748
Nisch	2	52	30	102.267	9.69375	22	87.5455	8.90067
P4ha1	2	52	33	65.9394	8.21429	19	40.7895	8.32963
Pdia5	2	52	23	89.2609	11.983	29	88.3103	7.45882
Polr2d	2	52	28	92.6429	10.3162	24	79.4583	6.1537
Prpsap1	2	52	26	96.7308	10.6972	26	76.5769	7.54889
Psmb2	2	52	20	85.35	6.71538	32	99.8438	8.74208
Psmg1	2	52	36	81.4722	5.94373	16	60.4375	9.13397
Pum3	2	52	31	63.5161	6.64404	21	63.9048	7.89124
Snw1	2	52	29	61.6207	5.29945	23	76.0435	8.54046
Spcs2	2	52	27	77.7407	8.22766	25	65.4	4.92796
Uba1	2	52	22	84.7727	11.991	30	87.1667	7.14455
Uba52	2	52	23	101.391	11.8779	29	67.2414	5.80083
Asf1a	2	51	27	68.7037	7.59319	24	62.2083	6.78232
Atp5o	2	51	24	79.375	6.66532	27	61.8148	4.96795
Bex3	2	51	30	80.6	7.90578	21	80.4286	10.9544
Celf2	2	51	25	102.12	10.751	26	108.308	13.7336
Chic2	2	51	23	68.5217	6.89315	28	63.5	6.97563
Ctdnep1	2	51	21	84	6.35531	30	81.5333	9.51358
Dnaaf2	2	51	29	71.4483	6.99254	22	64.6818	7.97553
Dnajc25	2	51	28	67.7143	7.55859	23	66.4348	7.40735
Eif5b	2	51	30	71.2	10.2654	21	46.5238	6.34875
Gak	2	51	21	102.476	9.7849	30	85.3667	8.06825
Gm7879	2	51	28	60.9643	4.71198	23	70.8696	10.2604
Hmgcs1	2	51	27	90.4074	8.56817	24	88.3333	10.5856
Ift46	2	51	28	72.4286	6.36024	23	72.5652	9.77359
Ints13	2	51	26	74.2692	7.74741	25	65.6	7.75443
Mphosph6	2	51	30	83.5	7.59382	21	67.9048	8.81915
Ncbp2	2	51	25	82.48	9.64458	26	62.0385	5.95558
Ndufb9	2	51	20	85.8	13.1451	31	65.3226	6.87443
Pole4	2	51	27	78.9259	13.4448	24	97.5	11.1131
Prkrip1	2	51	22	92.5	10.299	29	73.1724	5.96065
Rpn1	2	51	32	88.1875	7.31389	19	77.0526	10.9975
Rps6ka4	2	51	31	84.9032	9.16542	20	66.85	11.173
Son	2	51	30	63.3667	9.02829	21	75.1429	9.40504
Spg21	2	51	28	75.2857	5.94573	23	59.2609	3.63465
Srp14	2	51	34	86.8529	10.7357	17	80	8.71144
Tial1	2	51	35	68.8857	7.26723	16	61.6875	7.04102
Tnfrsf1a	2	51	28	88.6786	8.24808	23	98.5217	11.6977
Trappc6b	2	51	31	74.0645	7.28789	20	42.5	4.80859
Tubb2b	2	51	21	113.857	14.3357	30	71.1333	9.25332
Uchl3	2	51	28	63.1429	4.83575	23	58.3913	6.53816
Usp16	2	51	24	70.8333	7.61159	27	85.7778	12.8524
Usp39	2	51	23	70.087	6.10213	28	72.7143	7.36544
Wsb1	2	51	24	59.2917	11.4925	27	53.2593	10.9303
2810004N23Rik	2	50	29	68.5862	6.30639	21	86.3333	12.4271
Acot9	2	50	27	70	5.89436	23	54.6087	4.18375
Alas1	2	50	26	79.4231	8.47013	24	63.0833	8.05685
Apoo	2	50	26	58.1923	5.64324	24	73.9583	10.0192
Cd63-ps	2	50	25	87	8.16314	25	98	13.7842
Cdc5l	2	50	24	78.375	9.87418	26	74.9231	8.28718
Csrnp1	2	50	25	84.2	8.45241	25	100.4	8.16039
Cst3	2	50	29	76.7586	8.5589	21	52.6667	6.53937
Ect2	2	50	29	71.5862	9.79049	21	67.9524	8.65239
Eri3	2	50	24	88.75	8.64485	26	81	9.09987
Hoxd13	2	50	35	85.8	9.55618	15	65.3333	12.3525
Mre11a	2	50	23	90.4348	6.44764	27	79.7407	6.29163
Mrpl2	2	50	23	100.217	13.3381	27	67.963	6.57811
Mrps15	2	50	27	68.7778	5.82727	23	73.7826	6.21783
Mrps18c	2	50	22	70.1818	7.44113	28	72.75	7.35552
Ncbp1	2	50	30	86.9333	8.91515	20	74.4	10.6305
Nsun2	2	50	26	83.4231	11.1144	24	76.0417	7.54833
Pdia4	2	50	23	122.522	10.1454	27	115.667	8.98253
Polr2e	2	50	21	81.381	7.09107	29	86.8966	6.83443
Psip1	2	50	26	64.6538	8.02823	24	63.75	9.8385
Rnaset2b	2	50	26	71.5385	10.6797	24	80.5833	8.99072
Rnf5	2	50	26	83.4231	7.64121	24	85.2083	8.05816
Rsu1	2	50	32	95.1562	8.4228	18	85.1111	10.5362
Slc38a4	2	50	21	80.0952	7.46174	29	78.0345	7.35583
Thumpd3	2	50	26	71.9615	4.50656	24	72.625	6.57722
Tmem41b	2	50	22	51.9545	7.71214	28	53.5	5.28994
Trip10	2	50	25	72	8.24854	25	87.8	10.6379
Ube2j1	2	50	24	67.3333	5.60712	26	70.7692	8.11827
Ugp2	2	50	29	62.3793	6.96917	21	58.2857	6.98432
Anxa4	2	49	24	96.5417	9.35136	25	92.48	7.50554
Ap2a2	2	49	22	80.7727	9.56922	27	98.3704	7.93944
Aurkb	2	49	28	79.7857	8.03506	21	103.286	8.77926
Bzw2	2	49	24	77.9167	7.15986	25	73.76	7.95332
C1d	2	49	27	72.6667	8.19063	22	70.1364	7.18622
Cyb5b	2	49	29	80.4483	5.85204	20	95.9	14.3828
Dcun1d1	2	49	22	56.5909	7.1042	27	46.4815	5.30791
Dnajb11	2	49	19	91.7368	11.3835	30	91.5333	7.92278
Dnpep	2	49	25	74.24	7.05686	24	91.9167	11.3336
Ehd1	2	49	22	82.6818	9.86445	27	95.1852	10.3594
Gid8	2	49	26	79.3846	10.5938	23	74.2609	10.4854
Gorasp2	2	49	21	76.3333	8.11324	28	77.8214	7.729
Gtse1	2	49	31	87.4839	10.4563	18	91.6667	12.8108
Lamtor1	2	49	27	78.4444	6.99997	22	98.7727	12.7227
Lsp1	2	49	21	95.7143	9.2005	28	79.75	7.84604
Mettl9	2	49	21	86.5238	10.9769	28	77.4643	6.6027
Mrps30	2	49	25	69.56	7.92648	24	86.0417	17.4817
Nfe2l2	2	49	16	106.875	11.7868	33	67.7879	7.23713
Plaa	2	49	20	83	11.6243	29	72.1724	7.77126
Pnn	2	49	23	67.7826	6.36269	26	60.1538	6.82293
Psma7	2	49	24	72.625	6.25245	25	68.72	7.43172
Rbmx2	2	49	31	90	9.28651	18	70.3889	7.33423
Rbpj	2	49	23	66.8696	6.03089	26	63.8846	8.42656
Rsrp1	2	49	24	98.5833	12.4264	25	94.44	15.9026
Ssu72	2	49	29	77.5862	7.78005	20	74.65	6.85685
Tex261	2	49	30	101.567	8.80425	19	86.2105	9.52954
Tmem254a	2	49	21	85.9524	7.67346	28	84.3214	8.25148
Txnrd1	2	49	25	90.76	12.7108	24	74.9583	7.54304
Wbp11	2	49	31	72.6774	6.84835	18	75.6111	12.7166
Yipf4	2	49	26	69.3462	9.58687	23	72.2174	17.2457
Zc3h11a	2	49	26	61.3462	7.82557	23	65.3913	7.59483
1700123O20Rik	2	48	28	70.2857	5.98848	20	57.7	5.32734
2900097C17Rik	2	48	30	72.0667	8.62566	18	63.3889	10.265
Atp1a1	2	48	25	102.64	10.1636	23	82.7391	8.23777
Atp6v1d	2	48	23	63.4348	5.95027	25	74.36	8.9396
Aven	2	48	21	79.9048	8.22361	27	71.1481	7.2937
Cdca7	2	48	23	118.391	15.0583	25	118.48	12.9297
Cmpk1	2	48	25	73.8	5.63787	23	67.6087	7.48072
Cript	2	48	20	81.25	7.29105	28	62.8571	5.2813
Cs	2	48	15	85	8.35969	33	82.6364	6.09819
Csf1	2	48	31	82.4516	9.42905	17	93	14.1575
D10Wsu102e	2	48	21	57.4762	5.53841	27	70	10.4367
Edf1	2	48	25	79.52	6.46272	23	65.1739	7.41139
Extl2	2	48	19	70.3684	10.7289	29	56.8966	8.19448
Hoxb1	2	48	28	105.179	9.59513	20	107.85	16.5223
Hs2st1	2	48	25	81.96	11.7511	23	74.2174	7.77543
Lgals3	2	48	30	71.8667	6.88601	18	69.7222	7.37564
Maged2	2	48	26	90.8846	7.72748	22	79.5455	6.102
Mthfd1l	2	48	28	76.0714	5.8593	20	80.95	10.3471
Myo1c	2	48	29	83.6207	9.49327	19	75.9474	12.9765
Ndufa10	2	48	24	91.5417	11.5946	24	73.4583	9.1888
Ndufb10	2	48	20	91.9	10.8717	28	75.8571	6.09527
Orc4	2	48	26	59.2692	7.02606	22	58.7727	8.33442
2019-09-11	2	48	20	104	13.6481	28	79.0714	7.62145
Srrt	2	48	25	70.68	7.16251	23	72.4783	11.5972
Tbpl1	2	48	20	73.9	7.92272	28	78.2143	9.4041
Txlna	2	48	25	97.92	9.14696	23	107.087	12.1886
Ubac1	2	48	27	69.6296	5.89556	21	60.0952	6.47721
Ube2v1	2	48	22	80.9545	9.447	26	93.2692	9.32636
Ufsp2	2	48	29	63.2759	5.27708	19	56.8947	5.96708
Umps	2	48	25	82.16	8.16758	23	81.1304	9.084
Utp4	2	48	31	84.6129	8.02087	17	61.8824	8.73282
Xpo1	2	48	31	64.7097	8.71842	17	80.1765	10.6736
2310033P09Rik	2	47	25	82.92	13.2606	22	67	6.27635
Angptl2	2	47	25	86.64	9.5537	22	79.6364	7.37808
Aurka	2	47	25	92.12	9.30244	22	74.1818	8.05062
Ccng1	2	47	26	67.6154	6.09007	21	64.1429	8.34143
Csnk1g2	2	47	28	80.1071	8.98445	19	68.6842	7.71517
Eif2b3	2	47	21	87.0952	12.882	26	69.5385	7.22058
Exosc1	2	47	26	63.3077	7.13599	21	56.8571	6.3597
Fbxw2	2	47	26	70.5385	6.0195	21	72.9524	6.04761
Fen1	2	47	24	99.3333	10.6739	23	93.4783	8.13935
Fez2	2	47	20	90.4	8.9851	27	69.4074	6.34518
Gipc1	2	47	23	63.2609	5.60388	24	70.2917	6.28724
Gm26825	2	47	24	113.042	12.3494	23	91.6522	8.2562
Gm42742	2	47	22	84.3636	8.05342	25	80.6	8.61329
Gpn3	2	47	22	69.8182	5.46614	25	67.72	7.14546
Hdhd2	2	47	27	92.037	11.5322	20	82.35	8.66437
Ifrd2	2	47	32	74.4062	5.90945	15	57.0667	5.73989
Knop1	2	47	29	72.0345	7.97178	18	69.2222	8.29754
Lsm2	2	47	32	98.9688	8.15804	15	109.333	10.9304
2019-03-05	2	47	22	52.4091	4.69115	25	80.04	8.69712
Mesd	2	47	25	74.92	9.20711	22	70.6818	7.5524
Myc	2	47	19	82.2632	9.71757	28	81.0714	9.25544
Ncoa4	2	47	18	95.1667	15.4459	29	90.1034	10.2081
Ndufaf1	2	47	28	77.5	7.98268	19	51.4211	6.3653
Nes	2	47	19	94	11.3923	28	101.464	10.7835
Nup54	2	47	27	62.3704	6.25918	20	52.55	6.94387
Plin3	2	47	23	74.2174	7.82777	24	65.625	9.28948
Ptcd1	2	47	25	100.08	10.6434	22	90.7727	10.5582
Rab14	2	47	21	75.9048	10.3641	26	70.0769	8.01273
Rfc3	2	47	23	76.4348	8.05671	24	65.875	7.63065
Rpa3	2	47	26	84.4615	9.43025	21	70.2381	6.22842
Sephs1	2	47	27	79.7778	11.245	20	66.35	13.5982
Smo	2	47	24	85.375	6.21289	23	87.6957	7.47154
Srrm2	2	47	23	147.087	12.0683	24	142.583	19.4252
Tmem65	2	47	25	62.92	6.37869	22	55.8182	5.40112
Tpd52l1	2	47	32	78.5	7.71666	15	84.7333	11.0853
Tsc22d1	2	47	25	89.88	10.958	22	75.9545	10.5485
Vps35	2	47	20	92.7	9.42234	27	65.5185	5.83386
Yars	2	47	23	90.1739	8.57826	24	77.4167	7.49072
Ywhag	2	47	26	88.8846	10.8862	21	97.8571	11.9546
Zdhhc3	2	47	29	83.2069	5.99353	18	87.1667	10.0628
6820431F20Rik	2	46	23	62.913	9.3467	23	43.3043	5.53813
Aqp1	2	46	37	98.027	6.27696	9	102.889	11.4465
Atp5g1	2	46	21	83.8571	9.27002	25	63.28	5.68043
Bmpr1a	2	46	32	78.1562	8.51253	14	61.5	8.26275
Bnip3l	2	46	22	90.5	12.7211	24	63.375	7.30435
Cbfb	2	46	16	59.375	10.8674	30	52.4333	7.84654
Celf1	2	46	23	61.4783	5.42168	23	76.5652	10.3558
Ddah2	2	46	20	60.4	5.10999	26	77.5769	8.89421
Dgat1	2	46	18	76.7778	9.97452	28	75	7.8586
Dis3	2	46	27	70.5556	11.4309	19	51.7368	6.97476
Dnttip1	2	46	32	81.4375	8.37721	14	62.3571	7.28054
Farsb	2	46	28	74.1429	6.33155	18	64.2778	6.60144
Fxyd5	2	46	24	69.7917	5.48292	22	73.3182	6.94827
Gm4737	2	46	25	73.96	6.55524	21	74.619	5.46582
Gpc1	2	46	31	110.032	7.27768	15	90.6	14.876
Kdelr1	2	46	22	72.2727	7.59137	24	79.5417	6.3336
Knstrn	2	46	23	66.8261	7.52655	23	72	7.15188
Kpna4	2	46	19	80.6842	10.395	27	65.3333	7.03665
Magohb	2	46	22	80.5	10.4533	24	66.8333	6.96237
Mrps27	2	46	22	60.3636	3.49944	24	96.875	9.25831
Noct	2	46	18	81.4444	9.76521	28	77.75	13.0201
Nt5c3b	2	46	27	83.6296	6.70486	19	89.7895	8.41532
Plxnb2	2	46	20	107.4	12.7842	26	104.962	11.6005
Prpf38b	2	46	25	66.96	7.55216	21	70.619	9.2945
Ptcd3	2	46	24	66.875	9.62497	22	51.0455	9.85693
Rab5c	2	46	26	74.8462	7.59938	20	94.7	11.0225
Rfc2	2	46	22	71.3636	8.14094	24	64.2083	5.5973
S100a10	2	46	21	87.4286	9.42775	25	82.36	8.71245
Samd4b	2	46	21	75.1905	10.3981	25	68.96	8.50835
Slc7a5	2	46	25	112.28	7.58873	21	100.048	10.1241
Snx4	2	46	20	68.7	6.51272	26	85	8.95981
Srek1ip1	2	46	21	75.9524	8.04508	25	60.88	7.21938
Ssr4	2	46	23	64.8696	5.72472	23	64.6087	8.24202
Taldo1	2	46	24	83.6667	6.59984	22	70.0455	5.09191
Tead1	2	46	21	71.1429	13.0543	25	50.08	7.25665
5730480H06Rik	2	45	26	73.1923	6.65663	19	76.5263	7.22736
Aatf	2	45	20	81.4	8.82366	25	89.12	12.5885
Akap8	2	45	23	61.1304	9.31375	22	61.8636	10.9485
Carhsp1	2	45	20	89.2	10.1844	25	80.48	6.62193
Crlf1	2	45	22	89.4545	10.2338	23	88.3478	8.86138
Dazap2	2	45	23	95.8261	11.1436	22	92.1818	12.392
Hsbp1	2	45	23	100.261	10.8581	22	80.9545	8.33579
Id2	2	45	24	61	8.27186	21	51.619	10.3712
Ino80e	2	45	28	88.5357	8.58548	17	78.5882	7.72631
Ipo4	2	45	23	77.5217	6.41061	22	95.8182	10.8076
Iqgap1	2	45	28	95.8571	9.34592	17	89.5882	12.377
Iscu	2	45	26	86.4615	10.7205	19	85.1053	11.7678
Klhl2	2	45	24	70.4583	6.27688	21	72.6667	7.11975
Lman1	2	45	24	83.7083	11.5782	21	75.8095	9.4097
Mfge8	2	45	22	105.409	9.23022	23	88.2174	8.90593
Ndc1	2	45	22	92.5909	13.7987	23	95.9565	9.45399
Nolc1	2	45	30	88.4667	9.188	15	69.0667	10.6481
Phlda3	2	45	20	84.3	8.90677	25	69.84	7.02309
Pih1d1	2	45	22	78.4545	8.74471	23	63.6522	6.2317
Ppp1r18	2	45	30	74.5667	7.03115	15	83.0667	9.04923
Prps1	2	45	28	73	7.94336	17	62.5294	5.32547
Psme1	2	45	23	100.87	10.6998	22	80.4091	7.45528
Ptgs2	2	45	25	86	11.0277	20	59.6	11.2066
Rab34	2	45	21	85.6667	13.2737	24	90.2083	12.8737
Rbm22	2	45	26	100.385	7.60665	19	79.9474	9.81617
Rnf34	2	45	26	71.0769	7.1161	19	73.3684	9.15251
Rnf8	2	45	22	84.5909	8.9046	23	85.913	11.3697
Rps15a	2	45	25	89.28	13.0697	20	79.2	11.595
Rragc	2	45	23	90.9565	9.76133	22	84.2727	7.90783
Rrs1	2	45	21	59.8571	8.36397	24	62.7083	6.67148
Sdhc	2	45	23	85.5217	12.0561	22	93.0909	10.9089
Slc25a17	2	45	24	71.375	6.62665	21	71.9524	7.02134
Snx17	2	45	26	79.6923	9.1909	19	55.3684	4.99263
Sptlc2	2	45	21	66.4286	8.89076	24	66.8333	6.38593
Tbc1d15	2	45	22	60.5	7.84766	23	79.2609	11.3504
Tmem5	2	45	25	74.88	5.9163	20	52.25	4.22308
Tram1	2	45	14	50	7.95074	31	43.871	7.64165
Trim35	2	45	26	93.1923	7.80665	19	89.8947	13.1478
Tsg101	2	45	26	59.3077	5.81845	19	64.8421	10.0765
Tubb3	2	45	16	78.25	9.53673	29	89.9655	5.72611
Wdr26	2	45	26	75.2308	11.8362	19	74.7895	13.4076
Ankrd1	2	44	13	61	19.8435	31	79.871	11.7555
Asph	2	44	27	72.8148	7.45669	17	56.4118	8.3658
Atl3	2	44	17	95.2353	13.2165	27	74.3704	7.12694
Atp6v1b2	2	44	29	77.3448	7.02726	15	64.2	10.1172
Aunip	2	44	25	62.28	6.58642	19	47.2105	5.84736
Cdipt	2	44	22	79.9091	7.18984	22	66.6818	6.35336
Cers5	2	44	22	72.1818	6.97565	22	73.2727	9.05132
Cfap20	2	44	26	85.6154	10.7835	18	69.5556	10.7201
Coa3	2	44	20	78.7	6.60761	24	87.4583	8.3454
Dnajb4	2	44	22	71.2727	9.62954	22	70.4091	10.4989
Dpy30	2	44	28	83.6786	10.1063	16	48.0625	2.57006
Emc3	2	44	21	78.8571	7.54136	23	71.2609	9.5193
Eri1	2	44	16	80.5625	14.0707	28	63.3214	6.58191
Fip1l1	2	44	24	72.125	7.94563	20	76.2	8.06461
Fra10ac1	2	44	13	42.3846	5.0495	31	74.6452	7.0202
Ggnbp2	2	44	23	62.5652	6.32689	21	60.2381	6.6809
Gm9894	2	44	27	83.1111	15.5058	17	116.647	28.796
Grk6	2	44	23	89.5217	12.2055	21	93.619	12.0467
Mad1l1	2	44	26	93.6538	11.9748	18	78.7778	9.49222
Map4k4	2	44	24	90.625	12.7788	20	75.9	9.73368
Mff	2	44	25	77.44	6.20866	19	64.2105	7.20864
Ndufa13	2	44	21	113.667	13.3461	23	98.3043	10.5975
Pfn2	2	44	20	80.1	7.01103	24	74.8333	7.628
Plin2	2	44	26	87.5769	8.11861	18	73.2778	5.9829
Ppat	2	44	23	69.3478	9.5975	21	45.4286	6.13919
Rnf10	2	44	21	66.8571	6.03478	23	83.3478	6.895
Rtcb	2	44	28	92.0714	8.79107	16	86.8125	9.53252
Sec62	2	44	25	70.96	6.6138	19	68.6842	7.6528
Sra1	2	44	24	70.1667	8.10043	20	61.75	5.31078
Stard3nl	2	44	20	87.8	10.5746	24	83.5833	5.64546
Taf5l	2	44	21	80.7143	8.13579	23	81.7826	9.5252
Tamm41	2	44	19	65.1579	6.53703	25	65.72	6.82197
Timm23	2	44	17	70.2941	12.1039	27	67.8148	7.92126
Ubxn4	2	44	23	57.1304	5.9173	21	67.7143	7.75771
Utp18	2	44	23	77.8696	10.5245	21	78.381	10.277
1700037H04Rik	2	43	22	92.5455	10.748	21	73.0952	6.32524
1810009A15Rik	2	43	23	79.4348	8.96745	20	56.9	4.12062
1810055G02Rik	2	43	20	98.3	11.3122	23	98.2609	12.7303
2010111I01Rik	2	43	18	97.8889	14.0227	25	87.48	9.69125
2410006H16Rik	2	43	18	136.667	16.4838	25	122.8	14.3151
9130401M01Rik	2	43	27	72.2963	6.55416	16	77.5625	9.10785
Abcg2	2	43	22	58.9091	6.38629	21	54.0952	7.14473
Ankrd40	2	43	21	78.6667	8.71242	22	92.3182	13.3662
Ccndbp1	2	43	21	77.3333	7.21875	22	98.5	9.84377
Ccnf	2	43	26	108.654	14.1278	17	88	10.3903
Cisd1	2	43	24	72.5417	7.55259	19	66.2105	8.44424
Clns1a	2	43	23	98.913	11.6993	20	75.4	6.26634
Copb1	2	43	22	79.2273	8.78554	21	76.6667	7.63312
Crcp	2	43	19	60.7895	6.52529	24	45.4167	6.74483
Ctps2	2	43	21	73.381	5.53385	22	70.9545	6.90594
Cxcl12	2	43	16	84.8125	11.7816	27	79.5926	14.3138
Dlgap5	2	43	20	58.15	8.66091	23	61.087	8.61921
Drg2	2	43	19	85.8947	9.4338	24	67.0833	5.76144
Exosc9	2	43	21	79	8.74247	22	87.7273	9.27522
Gm38056	2	43	28	66.3214	4.39853	15	72.6667	8.41938
Gng12	2	43	22	86.3636	9.80145	21	69.1905	7.25519
Hmgb3	2	43	26	54.3462	5.73785	17	64.7059	9.54384
Hras	2	43	21	83.1429	9.46944	22	60.7727	5.46738
Hspb1	2	43	22	90.1364	9.71777	21	86	9.21302
Itga5	2	43	25	87.2	10.2153	18	83.6111	11.1145
Kif5b	2	43	24	69.0833	7.80623	19	76.5263	12.4899
Nab2	2	43	24	91.875	11.2403	19	106.263	13.8069
Nup85	2	43	23	83.0435	11.0024	20	112.85	16.6987
Rpl7l1	2	43	16	76.9375	7.48565	27	74.1111	9.67926
Rsl24d1	2	43	33	102.364	9.39294	10	71.7	17.9756
Sap30bp	2	43	21	72.4286	5.61645	22	76.5	9.19638
Scoc	2	43	20	59.7	9.48027	23	41.7826	5.65149
Sh3bgrl3	2	43	19	100.842	11.9712	24	90.3333	8.71136
Snx2	2	43	21	72.9524	7.24138	22	61.5455	5.51397
Srp9	2	43	18	87.3889	8.8931	25	89.52	9.33314
Syap1	2	43	16	49.5625	6.75461	27	69.1111	6.44941
Washc5	2	43	20	83.5	10.517	23	70.6957	6.87106
Wdr46	2	43	27	97.7778	7.76654	16	97.3125	12.178
Yaf2	2	43	26	90.7308	10.9528	17	82.3529	7.50637
Acbd3	2	42	21	66.6667	4.68187	21	80.1429	9.18154
Aif1l	2	42	20	81.15	9.49691	22	84.0455	11.2468
Cdc123	2	42	19	78.3158	13.3078	23	60.5652	5.90595
Cdkn1a	2	42	27	64.5185	7.74373	15	55	10.2115
Dcps	2	42	29	82.0345	9.61488	13	81.5385	10.5425
Dnajb1	2	42	21	84.7143	10.197	21	75.381	8.77005
Fads3	2	42	14	87.6429	10.6697	28	84.4286	8.24195
Fam168b	2	42	18	82.4444	7.13071	24	61.2083	12.4232
Gm5601	2	42	21	77.5238	9.51776	21	61.8095	6.20972
Kdelr2	2	42	21	92.4762	7.95441	21	98.4762	9.17544
Kmt5a	2	42	20	64.75	9.39624	22	67.2727	9.10458
Lsm12	2	42	23	62.8261	10.3264	19	67.7895	11.6516
Mcm4	2	42	23	89.1739	9.59278	19	61.8947	8.73491
Napa	2	42	29	103.897	10.7706	13	91	10.2749
Nol12	2	42	21	78	11.8952	21	66.9048	7.52408
P3h4	2	42	18	84.4444	9.9366	24	78.6667	7.65322
Parva	2	42	21	88.8095	12.7869	21	68.4762	7.54025
Pdcd10	2	42	23	85.5652	11.1509	19	73.6842	9.58648
Phc2	2	42	22	98.3636	9.8923	20	85.05	9.97333
Pum1	2	42	17	67.5294	12.6732	25	68.36	9.28773
Ryk	2	42	21	68.0952	6.34814	21	70.381	6.66751
Sbds	2	42	23	66.3478	8.47717	19	77.3158	9.68308
Sec22b	2	42	24	59.5	4.30358	18	84.0556	7.97661
Slc35a4	2	42	21	82.381	7.83835	21	84.9048	9.55849
Tfg	2	42	18	74.3889	10.1112	24	64.0417	7.59945
Tnc	2	42	26	131.423	11.6144	16	98.5625	12.6479
Top2a	2	42	22	84.7273	10.6576	20	93.3	12.1271
Trappc13	2	42	21	82.8571	10.6816	21	67.2381	9.36436
Ube2w	2	42	15	63.5333	7.96708	27	53.7037	8.52815
Wdr77	2	42	22	98.1364	6.79003	20	81.3	16.9583
2210016L21Rik	2	41	21	82.3333	8.99567	20	86.05	8.4969
Aaas	2	41	23	71.6957	6.73687	18	77.2222	11.5581
Add1	2	41	25	83.8	8.93926	16	94.0625	12.0631
Apex1	2	41	24	59.4583	5.24304	17	53.7647	7.44415
Bcar1	2	41	25	93.4	9.84033	16	81.0625	15.8904
Bms1	2	41	25	79.08	8.96802	16	93.375	13.4315
Cars	2	41	16	101.125	13.2653	25	73.84	10.1774
Ccnd3	2	41	23	74.2609	8.48488	18	71.3889	5.76876
Cd151	2	41	15	96.6	14.3126	26	83.1538	13.1666
Cd81	2	41	23	133.652	9.81196	18	118.889	9.5413
Cdc16	2	41	19	89.1579	10.4389	22	64.2727	5.93323
Ddx18	2	41	25	96.92	11.0588	16	69.6875	7.68609
Eif4g3	2	41	24	71.1667	9.17966	17	74.2941	13.1627
Erdr1	2	41	9	152.333	38.1314	32	107.844	17.0419
Farp1	2	41	16	67.8125	8.36483	25	71.36	11.6157
Fbxl14	2	41	24	78.75	8.43464	17	73.1765	8.11135
Fbxo3	2	41	23	87.913	11.2298	18	47.3889	6.44116
Fbxo5	2	41	25	63.68	6.22684	16	103.812	14.969
Gnpnat1	2	41	27	72.7037	8.5697	14	65.7857	9.36841
Gtf3c6	2	41	23	68.3478	6.94254	18	83.6667	10.5775
Kctd10	2	41	24	80.25	7.07874	17	94.7647	10.2047
Larp7	2	41	19	52.8421	5.67605	22	58.1364	6.72736
Mob1a	2	41	25	77.28	7.96041	16	90.75	16.3166
Mrpl3	2	41	22	63.6818	4.73966	19	62.1579	7.1549
Mrpl39	2	41	22	64.6818	7.21894	19	40.4211	3.30476
Mrps25	2	41	21	90.2381	8.09885	20	62.25	5.9118
Mrps9	2	41	21	57.5238	6.27005	20	62.4	6.30016
Nfic	2	41	18	71.9444	8.90709	23	45.1739	6.34355
Nop2	2	41	19	108.737	14.8178	22	71.9545	7.00309
Nudt22	2	41	16	77.375	8.77357	25	79.68	8.55378
Pcnp	2	41	24	84.5417	7.93244	17	109.765	14.2065
Pde6d	2	41	23	83.1739	8.53408	18	105.833	34.3405
Plec	2	41	26	100.846	15.8574	15	87.4	12.3899
Plrg1	2	41	24	84.4167	8.80911	17	58	4.35135
Prdx3	2	41	28	83.7857	6.70979	13	82.1538	8.49354
Prelid3b	2	41	24	75.625	7.18598	17	101.176	15.9827
Ptpn11	2	41	21	84.381	7.66252	20	92.25	8.93333
Pus1	2	41	24	81.4583	8.67487	17	101.294	11.9146
Sorbs3	2	41	17	92	6.01613	24	82.1667	7.99233
Spcs3	2	41	22	87.0909	8.97446	19	87.4211	11.9575
Tdp2	2	41	21	93.6667	14.5663	20	86.75	9.11451
Thrap3	2	41	23	93.6522	13.5261	18	87.2778	14.6243
Tinagl1	2	41	24	116.333	9.91065	17	82.3529	14.2627
Trim27	2	41	19	74.4737	9.07231	22	68.3636	8.576
Ubqln1	2	41	18	76.8889	7.51291	23	72.5652	8.33668
Usp10	2	41	19	70.6316	7.87901	22	83.1364	12.6161
Yif1b	2	41	22	80.5	5.41186	19	77.9474	9.12865
AI837181	2	40	24	72.9167	5.85025	16	68.3125	10.0509
Abhd17a	2	40	28	75.8214	6.20978	12	73.3333	10.3631
Asap1	2	40	20	71.45	8.9021	20	67	7.56968
Cd24a	2	40	28	70.4286	6.43223	12	80.25	16.062
Chek1	2	40	22	62.4091	5.68079	18	53.6111	5.83103
Cinp	2	40	24	72.9583	7.73531	16	43.75	6.53745
Csde1	2	40	29	102.276	11.0004	11	104	13.9521
Ctnnd1	2	40	22	89.3182	10.5135	18	91.3889	18.9312
Dkc1	2	40	29	86.3793	14.6429	11	106.545	35.0318
Emc8	2	40	19	60.0526	4.76627	21	67.8571	8.8654
Emg1	2	40	24	74.5833	6.81856	16	82.8125	9.42081
Exosc10	2	40	14	71.7857	9.27427	26	75.3846	9.50211
Exosc6	2	40	19	91	10.54	21	95.9524	11.6096
Fam162a	2	40	22	65.8636	5.32237	18	77.7778	10.5469
Fam198b	2	40	22	50.1818	7.27717	18	67.2222	12.2231
Fbxl3	2	40	21	67.4762	8.96115	19	61.4737	8.71601
Flii	2	40	25	94.44	8.47832	15	59.2	6.84508
Glipr2	2	40	19	81	7.7909	21	91.4762	8.27931
Golga7	2	40	23	75.6087	10.4342	17	61	5.88882
H1f0	2	40	13	74.9231	9.91709	27	85.4444	10.7345
Hdgfl2	2	40	24	70.625	10.4937	16	61.875	4.90923
Hsd17b10	2	40	19	63.7895	5.68206	21	58.1429	3.89446
Lamp2	2	40	21	70.2857	7.71492	19	61.3684	9.90878
Lin7c	2	40	20	78.95	9.85608	20	69.5	8.4975
Mlec	2	40	12	72.3333	12.6866	28	82.75	7.60783
Mrpl58	2	40	25	74.28	8.2653	15	65.4	7.05017
Myg1	2	40	19	80.2105	11.534	21	68.1905	4.77504
Nipsnap2	2	40	20	71.5	8.7231	20	84.45	15.8914
Ntmt1	2	40	18	90.8333	10.5164	22	79.3636	7.368
Nub1	2	40	20	58.05	5.87217	20	72.45	10.5725
Pck2	2	40	20	91.1	11.6925	20	75.55	8.0503
Phf5a	2	40	22	101.455	14.0851	18	83.7778	12.6062
Polb	2	40	28	73.9286	7.41309	12	82.5	10.5518
Ppp2r3c	2	40	23	64	8.76774	17	58	12.8405
Prkci	2	40	18	81.3333	14.892	22	59.1818	8.38452
Psmb6	2	40	18	83.1667	11.0775	22	81	10.5217
Pspc1	2	40	19	98.3684	18.213	21	80.619	13.8527
Rae1	2	40	23	70.4348	7.67753	17	68.9412	9.71941
Rbm5	2	40	18	90.8333	14.3478	22	100.182	9.88563
Rras	2	40	20	65.15	8.08742	20	55.35	6.81442
Sdc1	2	40	12	69.3333	12.3847	28	82.8571	7.50913
Snx9	2	40	16	97.25	12.3793	24	92.7917	12.501
Tank	2	40	25	80.24	10.3937	15	60.8667	8.21266
Tex264	2	40	17	71.2353	8.73268	23	84.2609	7.30259
Timm8a1	2	40	20	70	10.3158	20	67.9	8.2386
Tmem43	2	40	18	116.556	12.2679	22	89.7273	6.42669
Ube2v2	2	40	18	51.1667	4.60156	22	58.2727	9.90955
Zfp422	2	40	20	80.2	13.5482	20	68.4	12.3995
Zmpste24	2	40	18	62.4444	10.8016	22	75.0455	11.7189
2310061I04Rik	2	39	20	64.9	8.80963	19	60.4737	7.90328
Armc10	2	39	23	75.8261	9.74139	16	68.3125	11.5053
Atf5	2	39	21	96.8571	8.37372	18	91.2222	8.40949
Atp1b3	2	39	20	66.55	8.64826	19	80.6842	11.6543
B230219D22Rik	2	39	24	52.1667	9.22513	15	37.9333	9.32498
Bdnf	2	39	22	54	6.54829	17	64.4706	15.8307
C1galt1c1	2	39	18	70.4444	8.99459	21	63.0952	8.15243
Caprin1	2	39	16	71.1875	10.4841	23	72.1739	9.53645
Ccdc58	2	39	15	58.7333	5.45565	24	69.0833	8.39848
Cdr2	2	39	19	66.7895	7.67432	20	78.1	10.2464
Commd3	2	39	19	74.7895	14.301	20	51.55	5.03313
Ddx27	2	39	18	55.7778	9.72541	21	56.1905	5.97258
Eif2b4	2	39	23	76.2174	10.4467	16	78.8125	6.12705
Eif2d	2	39	19	68.4211	9.2246	20	56.65	4.586
Ensa	2	39	14	81.7143	11.094	25	57.48	6.3104
Exosc2	2	39	20	81	14.447	19	52.6316	5.38759
Gls	2	39	16	60.0625	14.4945	23	56.913	9.23172
Gmfb	2	39	21	83.4286	15.94	18	76.8889	9.05228
Gpbp1	2	39	19	77.6316	10.8707	20	69.2	12.2386
Krcc1	2	39	22	74.7727	7.02738	17	79.7059	14.7004
Letm1	2	39	16	98.0625	18.4067	23	61.6522	5.81004
Maoa	2	39	15	81.1333	11.8178	24	73.9167	10.8421
Mars	2	39	15	75.2	16.0508	24	68.25	6.84634
Mrps33	2	39	20	79.5	8.77425	19	88.5263	14.0212
Naxe	2	39	15	81.1333	20.8659	24	76.4167	8.00042
Ncaph	2	39	25	89.92	9.68065	14	75.8571	12.1621
Neat1	2	39	27	85.2222	16.2002	12	97.8333	13.9676
Nfe2l1	2	39	16	103.062	15.5635	23	77.8696	11.4202
Orc2	2	39	19	86.8421	11.3417	20	77.4	12.8112
Osbpl9	2	39	16	78.625	5.18402	23	79.2609	6.84481
Pigk	2	39	19	75.4211	6.78817	20	75.55	7.26687
Ppic	2	39	16	62.0625	13.5521	23	88.3043	9.1044
Rab5a	2	39	16	97.1875	9.86638	23	78.3478	8.46624
Rhobtb3	2	39	19	74.8947	13.6032	20	61.75	7.53255
Rnf220	2	39	23	78.3478	7.64664	16	69.75	9.92491
Rpa1	2	39	20	80.3	9.22824	19	71.3684	5.26643
Rpf1	2	39	17	51.4118	11.0801	22	51.8636	7.83436
Rps6kb1	2	39	20	49.65	7.88583	19	39.1053	6.39204
Scnm1	2	39	20	100.3	13.6134	19	80.7368	12.1402
Srrm1	2	39	17	69.0588	9.66156	22	67.5	9.72722
Stau1	2	39	16	62.875	6.70231	23	74.6957	9.1328
Stx12	2	39	22	84.2273	7.12026	17	74.4118	9.38012
Stx7	2	39	22	95.5	12.6088	17	61.9412	4.38578
Tjap1	2	39	22	101.909	13.9014	17	84.7059	10.0555
Twsg1	2	39	16	91.875	12.5081	23	70.1304	13.2223
Vasp	2	39	18	83.8333	9.9192	21	79.9048	10.9213
Wdr33	2	39	17	68.1176	7.01451	22	59.6818	6.73875
Wdr43	2	39	18	89	11.574	21	59.9048	10.1561
Zfp326	2	39	22	83.1364	10.6706	17	67.6471	5.17242
Zranb2	2	39	19	67.7895	5.59659	20	56.95	8.40936
2410004B18Rik	2	38	21	58.4286	6.00815	17	61.6471	11.0322
Adipor1	2	38	18	84.8889	9.11548	20	88.3	7.50969
Aff4	2	38	20	89.65	12.351	18	82.7222	9.94919
Alyref	2	38	23	120.696	12.1042	15	111.867	16.7092
Arl6ip4	2	38	17	70.7647	8.14766	21	73.7619	9.00942
Ash2l	2	38	18	99.8333	12.7243	20	94.55	10.0495
Bcat1	2	38	19	79.6316	11.4805	19	98.6842	12.8207
[truncated: 9,815 more rows]

## Sheet: Key
This experiment set has 11,815 genes observed in WT and 10,492 observed in KO.
Column Header	Description
#gene	Gene Symbol from Gencode Assignment
Samples	Number of conditions CCS reads observed in
TotalCounts	Total number of CCS reads assigned to this gene across conditons
Count_WT	Number of CCS reads assigned to this gene in the WT condition
Mean_WT	Mean PAT Length of this gene in the WT condition
STE_WT	Standard Error of Mean Length in the WT conditon
Count_KO	Number of CCS reads assigned to this gene in the KO condition
Mean_KO	Mean PAT Length of this gene in the KO condition
STE_KO	Standard Error of Mean Length in the KO conditon
