# Supplementary material for: Single molecule poly(A) tail-seq shows LARP4 opposes deadenylation throughout mRNA lifespan with most impact on short tails
Source: eLife. 2020 Aug 3;9:e59186. doi: 10.7554/eLife.59186 (PMC7413741; doi:10.7554/eLife.59186)
Supplement: Supplementary file 3. [file elife-59186-supp3.xlsx]

## Sheet: LARP4 3x vs 1x increased
Gene	baseMean	log2FoldChange	lfcSE	stat	pvalue	padj	fold change
GBP1	1947.26	3.27043	0.170227	19.2121	2.92962e-82	2.71869e-79	9.64931
LARP4	67789.8	2.9843	0.126513	23.589	5.00406e-123	7.89441e-120	7.91344
APOL1	154.27	2.80128	0.177169	15.8114	2.59825e-56	1.28094e-53	6.97058
APOL6	3843.66	2.79635	0.093901	29.7797	7.15487e-195	1.12875e-190	6.94679
TRIM22	2411.4	2.50191	0.199704	12.5281	5.24152e-36	1.45071e-33	5.66436
SLC15A3	261.518	2.42686	0.248891	9.75067	1.83257e-22	2.98047e-20	5.37721
OAS3	219.312	2.39348	0.149613	15.9978	1.32373e-57	6.96104e-55	5.25422
TRANK1	178.481	2.38317	0.178928	13.3192	1.79114e-40	5.88687e-38	5.21683
XAF1	508.49	2.26918	0.0981514	23.1191	2.97347e-118	4.26449e-115	4.82048
MX2	565.903	2.26205	0.106692	21.2018	9.19614e-100	9.67189e-97	4.79674
OAS2	3822.11	2.22182	0.194901	11.3998	4.1925e-30	9.18624e-28	4.66482
PSMB9	433.571	2.1489	0.235935	9.10803	8.389e-20	1.18165e-17	4.4349
UBA7	674.542	2.09648	0.108204	19.3752	1.24856e-83	1.23108e-80	4.27664
SP100	1211.22	2.02791	0.157126	12.9063	4.14787e-38	1.23466e-35	4.07814
IFNB1	266.526	1.95047	0.121213	16.0912	2.93925e-58	1.65606e-55	3.86501
OAS1	2444.04	1.86561	0.065064	28.6735	8.16434e-181	4.29336e-177	3.64423
RSAD2	11296.1	1.85057	0.135856	13.6215	2.98279e-42	1.0457e-39	3.60642
IFI27	1125.57	1.84913	0.0628956	29.3999	5.5017e-190	4.33974e-186	3.60282
SAMD9L	1271.62	1.7918	0.134651	13.3069	2.10956e-40	6.79193e-38	3.46246
NMI	1443.29	1.77699	0.0707872	25.1033	4.57413e-139	8.01794e-136	3.42711
UBE2L6	2150.85	1.72025	0.0643736	26.7229	2.54865e-157	6.70124e-154	3.29494
OASL	3802.56	1.71813	0.180295	9.52955	1.57969e-21	2.46744e-19	3.29009
CCL5	395.743	1.57997	0.204409	7.72944	1.0802e-14	1.30085e-12	2.98963
IFI35	2585.93	1.56571	0.0562509	27.8344	1.66286e-170	6.55833e-167	2.96024
BST2	2192.62	1.54604	0.055581	27.8159	2.7856e-170	8.78913e-167	2.92014
NLRC5	2481.41	1.49167	0.0693559	21.5074	1.32627e-102	1.49452e-99	2.81214
IFIT2	19830	1.43451	0.131745	10.8885	1.30761e-27	2.54678e-25	2.7029
DHX58	810.017	1.42432	0.0938868	15.1707	5.53257e-52	2.56711e-49	2.68389
PARP10	3648.08	1.40732	0.0976348	14.4141	4.2193e-47	1.79902e-44	2.65244
CXCL11	129.631	1.37586	0.177044	7.77128	7.76986e-15	9.42902e-13	2.59522
IFI44	8990.65	1.36916	0.0534656	25.6082	1.23573e-144	2.43686e-141	2.5832
GBP1P1	234.605	1.36613	0.127927	10.679	1.27663e-26	2.4561e-24	2.57778
TLR3	328.298	1.36179	0.140359	9.70215	2.95221e-22	4.70446e-20	2.57003
C19orf66	359.656	1.33008	0.0990708	13.4255	4.28439e-41	1.46936e-38	2.51416
HCP5	346.223	1.31992	0.10254	12.8722	6.45354e-38	1.88539e-35	2.49652
PLEKHA4	314.472	1.30883	0.116599	11.2251	3.07131e-29	6.46039e-27	2.47741
LARP4P	108.537	1.29494	0.192265	6.73518	1.63725e-11	1.64518e-09	2.45366
CXCL10	621.995	1.27848	0.10376	12.3215	6.93692e-35	1.82395e-32	2.42583
LAMP3	291.155	1.26134	0.112472	11.2147	3.45172e-29	7.16504e-27	2.39719
BATF2	393.189	1.23071	0.105416	11.6748	1.71522e-31	3.92164e-29	2.34683
IFIT3	29876.6	1.22437	0.0812897	15.0618	2.88613e-51	1.26477e-48	2.33654
TAP1	6019.98	1.2222	0.0542411	22.5328	1.98051e-112	2.60372e-109	2.33303
ERAP2	2275.74	1.22062	0.110635	11.0329	2.65273e-28	5.23118e-26	2.33048
BISPR	224.613	1.1706	0.127445	9.18516	4.10924e-20	5.8403e-18	2.25105
WARS	17813.3	1.16755	0.0441452	26.448	3.84538e-154	8.66638e-151	2.24631
USP41	302.445	1.15917	0.12589	9.20779	3.32919e-20	4.81847e-18	2.23328
MT2A	852.19	1.15757	0.096318	12.0182	2.85227e-33	7.14244e-31	2.23081
TRIM5	2270.52	1.14894	0.0674341	17.038	4.29354e-65	2.94499e-62	2.21751
RASGRP3	523.927	1.14873	0.0952313	12.0625	1.66553e-33	4.23796e-31	2.21719
IFITM3	1097.04	1.14001	0.0823907	13.8367	1.53136e-43	5.7521e-41	2.20383
RNF213	16294.1	1.08752	0.0501915	21.6674	4.16367e-104	5.05277e-101	2.12508
USP18	11414.8	1.07442	0.061911	17.3542	1.83196e-67	1.37624e-64	2.10587
SECTM1	115.61	1.07104	0.169595	6.31528	2.69676e-10	2.40362e-08	2.10095
SP140L	366.515	1.03809	0.104115	9.97056	2.05072e-23	3.51653e-21	2.05351
HERC5	12576.2	1.03765	0.0608177	17.0616	2.86388e-65	2.05366e-62	2.05288
CMPK2	2265.36	1.03609	0.0628425	16.4871	4.54355e-61	2.98663e-58	2.05066
SIDT1	171.406	1.0058	0.137541	7.3127	2.61828e-13	2.88853e-11	2.00805
ISG15	20998	0.971102	0.0857366	11.3266	9.69162e-30	2.06615e-27	1.96034
PATL2	141.502	0.964093	0.148038	6.51246	7.39323e-11	6.90152e-09	1.95084
IFIT1	92431.9	0.943789	0.0517579	18.2347	2.73852e-74	2.27384e-71	1.92357
ANGPTL1	202.443	0.94082	0.143343	6.56343	5.25826e-11	5.05819e-09	1.91962
CFI	98.8927	0.933324	0.181461	5.14337	2.69847e-07	1.66243e-05	1.90967
BTN3A3	578.514	0.921546	0.0803737	11.4658	1.96001e-30	4.35509e-28	1.89414
ISG20	211.701	0.918145	0.155319	5.91134	3.39335e-09	2.7313e-07	1.88968
IFIH1	5890.68	0.913532	0.0982043	9.30237	1.37351e-20	2.00634e-18	1.88365
RHEBL1	130.517	0.907277	0.198409	4.57275	4.81358e-06	0.000233658	1.8755
HLA-E	9581.13	0.891216	0.0469527	18.9811	2.44236e-80	2.14059e-77	1.85474
DDX58	17364.4	0.887138	0.0870342	10.193	2.13131e-24	3.77792e-22	1.8495
SYNPO2	104.494	0.883554	0.19272	4.58465	4.54738e-06	0.000222794	1.84491
EPSTI1	2400.78	0.868324	0.0548769	15.8231	2.15497e-56	1.09667e-53	1.82554
IRF1	1132.06	0.867223	0.0708474	12.2407	1.88382e-34	4.872e-32	1.82415
NT5C3AP1	135.968	0.856475	0.158216	5.41333	6.18631e-08	4.21576e-06	1.81061
RGS4	106.989	0.850297	0.202887	4.19098	2.77749e-05	0.00105078	1.80287
HLA-F	627.326	0.842694	0.0977179	8.62375	6.47973e-18	8.66307e-16	1.7934
IFITM1	3538.72	0.841732	0.103595	8.1252	4.46619e-16	5.59196e-14	1.7922
GMPR	296.075	0.828589	0.134193	6.1746	6.63294e-10	5.7181e-08	1.77595
LGALS3BP	12050.1	0.823633	0.0531992	15.482	4.58674e-54	2.19274e-51	1.76986
C5orf56	273.83	0.818953	0.119538	6.85097	7.3352e-12	7.56341e-10	1.76413
IFI6	25327.5	0.812684	0.0507572	16.0112	1.06704e-57	5.8047e-55	1.75648
NT5C3A	5495.21	0.79624	0.0488577	16.2971	1.03454e-59	6.52834e-57	1.73657
SP110	1112.16	0.788022	0.0842251	9.35614	8.27042e-21	1.23089e-18	1.72671
ANXA3	181.81	0.757743	0.162545	4.66175	3.1353e-06	0.000161116	1.69084
HAPLN3	712.308	0.751825	0.0817076	9.2014	3.53315e-20	5.06718e-18	1.68392
CTD-2047H16.4	263.366	0.746825	0.112908	6.61445	3.72929e-11	3.63169e-09	1.6781
TRIM21	4218.17	0.743214	0.0594175	12.5083	6.72107e-36	1.82813e-33	1.6739
SAMD9	12101.7	0.727823	0.0549346	13.2489	4.5787e-40	1.44467e-37	1.65614
TRIM56	3726.35	0.727649	0.0524156	13.8823	8.11115e-44	3.12101e-41	1.65594
HLA-B	10303.9	0.725725	0.0448882	16.1674	8.56713e-59	5.00574e-56	1.65373
HERC6	3895.02	0.719519	0.0524925	13.7071	9.20967e-43	3.30209e-40	1.64663
TAPBPL	143.783	0.713553	0.161744	4.41163	1.02595e-05	0.000453474	1.63984
B2M	32419.2	0.701669	0.0395315	17.7496	1.73549e-70	1.36896e-67	1.62639
BTN3A1	1515.35	0.687569	0.0531681	12.932	2.97091e-38	9.01328e-36	1.61057
DDX60	4956.26	0.682668	0.0535001	12.7601	2.7372e-37	7.85127e-35	1.60511
RBM43	245.878	0.6822	0.13888	4.91216	9.00778e-07	5.13159e-05	1.60458
SLFN5	1864.62	0.678074	0.0647219	10.4767	1.10487e-25	2.02679e-23	1.6
TDRD7	4487.49	0.668343	0.048002	13.9232	4.578e-44	1.80556e-41	1.58925
APOL2	6354.4	0.660898	0.0594786	11.1115	1.10259e-28	2.20183e-26	1.58107
IFI44L	17011.5	0.658792	0.0463056	14.227	6.22666e-46	2.58505e-43	1.57876
HLA-C	26038.7	0.656506	0.0433894	15.1306	1.01826e-51	4.58975e-49	1.57626
RNF144A-AS1	125.821	0.649924	0.170954	3.80176	0.000143673	0.0042525	1.56909
GCNT4	156.134	0.645392	0.148038	4.35963	1.30281e-05	0.000556994	1.56416
SOCS3	171.808	0.644711	0.165754	3.88957	0.000100424	0.00313731	1.56343
NCKAP5	107.225	0.637655	0.17086	3.73204	0.000189938	0.00537964	1.5558
CSF1	859.883	0.637041	0.0710142	8.97061	2.94866e-19	4.04505e-17	1.55514
PRRG2	118.401	0.632464	0.186077	3.39894	0.000676467	0.0145593	1.55021
HELZ2	24368	0.629438	0.0548971	11.4658	1.95988e-30	4.35509e-28	1.54696
CYP2J2	349.963	0.624385	0.118694	5.26045	1.43702e-07	9.40684e-06	1.54155
IL15RA	230.324	0.623206	0.131461	4.7406	2.13087e-06	0.000113955	1.54029
ACTA2	183.298	0.621946	0.159288	3.90454	9.44046e-05	0.00300874	1.53895
HLA-DOB	112.197	0.60893	0.169076	3.60152	0.000316363	0.00808904	1.52513
APOBEC3F	419.995	0.602435	0.106757	5.64304	1.67077e-08	1.26115e-06	1.51828
TAPBP	3830.96	0.591159	0.0624788	9.46175	3.0284e-21	4.68393e-19	1.50646
TRIM38	1505.96	0.585426	0.0596786	9.80965	1.02318e-22	1.7172e-20	1.50048
PSME1	3996.17	0.580666	0.0484641	11.9813	4.4504e-33	1.08015e-30	1.49554
TLDC2	272.46	0.57703	0.119446	4.83089	1.35924e-06	7.47477e-05	1.49177
SAMHD1	19263.3	0.56967	0.0508134	11.211	3.60059e-29	7.37699e-27	1.48418
STAT2	10362.2	0.567923	0.0534446	10.6264	2.24651e-26	4.26998e-24	1.48239
DTX3L	14129.6	0.566087	0.0933063	6.06697	1.30347e-09	1.08802e-07	1.4805
MOB3C	373.575	0.566006	0.0925156	6.11795	9.47881e-10	7.99667e-08	1.48042
TAP2	2152.19	0.560982	0.0560918	10.0012	1.50637e-23	2.64049e-21	1.47527
PML	3728.66	0.560879	0.0573637	9.7776	1.40501e-22	2.3089e-20	1.47517
NCOA7	2782.1	0.54941	0.0523001	10.505	8.19565e-26	1.52111e-23	1.46349
MR1	880.989	0.548099	0.0720469	7.60753	2.79388e-14	3.2409e-12	1.46216
ANXA1	126.377	0.547495	0.187934	2.91322	0.00357717	0.0498529	1.46155
FHAD1	105.377	0.546138	0.217451	2.51154	0.0120204	0.115631	1.46017
TEKT2	103.078	0.546005	0.191594	2.8498	0.00437461	0.0576076	1.46004
LMO2	149.64	0.544014	0.17113	3.17895	0.00147811	0.0262302	1.45802
OPTN	3328.58	0.541209	0.0576127	9.39392	5.78056e-21	8.76866e-19	1.45519

## Sheet: Key
DESeq2 differential expression analysis comparing 3x to 1x Larp4
Column Header	Description
Gene	Gene Symbol
baseMean	Mean of normalized counts for all samples
log2FoldChange	log2 Fold change between 3x vs 1x Larp4
lfcSE	Standard Error of log2FoldChange
stat	Wald test statistic for the comparison
pvalue	Wald test p-value
padj	Benjamani-Hochberg corrected pvalue (FDR)
fold change	Flat Fold-Change of comparison
