# Supplementary material for: Single molecule poly(A) tail-seq shows LARP4 opposes deadenylation throughout mRNA lifespan with most impact on short tails
Source: eLife. 2020 Aug 3;9:e59186. doi: 10.7554/eLife.59186 (PMC7413741; doi:10.7554/eLife.59186)
Supplement: Supplementary file 4. [file elife-59186-supp4.xlsx]

## Sheet: Sheet1
		Count_WT_Un						Count_WT_000						Count_WT_030						Count_WT_060						Count_WT_120						Count_WT_240						Count_WT_480						Count_KO_Un
GeneID	Total_Count	Count_WT_Un	Mean_WT_Un	STE_WT_Un	Q1_WT_Un	Median_WT_Un	Q3_WT_Un	Count_WT_000	Mean_WT_000	STE_WT_000	Q1_WT_000	Median_WT_000	Q3_WT_000	Count_WT_030	Mean_WT_030	STE_WT_030	Q1_WT_030	Median_WT_030	Q3_WT_030	Count_WT_060	Mean_WT_060	STE_WT_060	Q1_WT_060	Median_WT_060	Q3_WT_060	Count_WT_120	Mean_WT_120	STE_WT_120	Q1_WT_120	Median_WT_120	Q3_WT_120	Count_WT_240	Mean_WT_240	STE_WT_240	Q1_WT_240	Median_WT_240	Q3_WT_240	Count_WT_480	Mean_WT_480	STE_WT_480	Q1_WT_480	Median_WT_480	Q3_WT_480	Count_KO_Un	Mean_KO_Un	STE_KO_Un	Q1_KO_Un	Median_KO_Un	Q3_KO_Un
Cxcl10	9656	5	96.2	12.6409	64.5	115	115	1119	89.6979	1.56993	50	79	115	922	86.1356	1.60727	47	76.5	113	875	78.4983	1.55186	45	68	104	1161	67.404	1.05126	41	60	85	1099	55.737	0.845071	37	47	69	941	50.2189	0.86644	34	43	60	0	.	.	.	.	.
Isg15	6581	72	70.4722	5.31173	35.5	57.5	98	632	93.0443	2.05678	53	89	129.5	547	91.2157	2.08827	53	88	126	435	75.554	2.05836	40	71	105	825	67.9479	1.28838	38	62	91	669	50.7892	1.15348	28	44	66	341	41.3109	1.32559	22	35	54	5	58.6	25.4253	20.5	26	41.5
Ly6e	5531	195	74.5385	2.73449	51	67	88	306	104.683	3.12455	62	87	153	259	111.255	3.27432	65	103	158	228	111.553	3.66481	64	108	155.5	438	115.708	2.25	74	123	153	568	108.792	1.92567	74	109.5	143	689	96.5675	1.49203	64	96	125	66	69.1061	4.79493	39	53.5	89
Pnp	4124	51	75.9216	7.25659	36	58	98	307	89.3713	2.76626	49	84	118	278	85.6906	2.71287	49	76	112	226	84.2522	3.05427	50	78	110	481	74.7796	1.63027	48	67	97	552	64.3786	1.29173	40	57	85	426	57.6925	1.30758	38	51	74	42	64.0476	4.45295	44	58	81
Irgm1	3374	34	56.7353	5.26385	35	48	67	292	66.4521	1.97965	43	59	84	285	66.1088	2.25946	40.5	55	84	221	63.7421	2.23133	38.5	56	83.5	255	64.6863	2.35736	38	56	79	215	57.6791	1.77868	39	53	72	146	53.7671	1.88447	37	50	65	23	64.9565	7.80807	33	51	86
Psmb8	2868	35	55.1429	5.10128	30	51	77	111	121.153	5.11533	75	130	162	102	105.029	4.88035	66	103	141	70	115.5	5.14848	83	118	143	196	86.8776	2.63822	57	86.5	117	299	72.214	1.82741	46	73	95	398	57.4322	1.32226	37	53	73	6	45.6667	14.5672	29	30.5	36
Gbp2	2616	2	63.5	7.42462	53	63.5	74	155	109.135	4.10467	59	107	150	126	105.659	3.86581	72	106.5	135	144	93.7014	3.51954	60.5	89	122	246	92.7276	2.25304	68	93	112	370	74.6892	1.52799	52	73	95	444	61.6689	1.18476	43	59	75	2	79	26.8701	41	79	117
Npc2	2044	134	82.0896	3.92292	47	69	105	138	93.2826	4.51219	55	78.5	124	87	100.655	5.45375	63	85	139	92	92.4239	5.51431	50	81	135.5	149	100.255	5.41358	57	80	133.5	167	87.2455	3.53831	49	80	115	196	89.8724	3.05659	55.5	81	119.5	77	73.3766	4.14243	45.5	65	87.5
Tspo	1803	82	76.7073	4.02256	50	70	96	119	84.916	4.93018	43	69	105	110	92.4909	4.90931	52	81	128	85	94.0471	5.12558	62.5	84	113.5	140	96.8286	4.15326	54.5	89.5	141.5	184	84.8859	3.02066	50	76.5	113.5	224	82.1652	2.5589	48.5	82	110	34	74.7059	5.97016	48	60.5	93
Igtp	1741	3	79.3333	5.42286	68	79	91	162	92.963	3.77324	60	81.5	120	114	77.7193	3.6427	45	71.5	102	178	77.1011	2.95741	48	68	100	165	67.1576	3.09083	39.5	56	86	118	60.8051	2.99696	38	52	77	131	60.6794	2.79064	38	52	77	0	.	.	.	.	.
Tgtp1	1735	1	61	.	61	61	61	153	78.7712	3.88927	49	67	94.5	145	83.0966	4.14553	48	67	107	79	62.1139	4.27065	33	56	75	168	57.5119	2.26991	38	49	70.5	136	48.1103	2.19223	30.5	41	59	80	45.05	3.55918	28	40	50	2	77.5	22.981	45	77.5	110
B2m	1648	78	103.577	7.27298	57	88	126	100	131.73	6.95016	77	123	183.5	100	137.79	6.77741	79	133	191.5	84	120.155	7.72779	59.5	105.5	179	133	137.504	5.65366	92.5	127	191.5	160	119.513	4.6228	69.5	115	163.5	192	122.182	4.17327	70.5	122.5	171	54	68.7407	5.77945	40	63.5	81
Usp18	1638	14	83.5	13.6904	55	74.5	89	256	85.9453	2.83294	52	75	109	173	86.2081	3.71561	49	74	116	156	68.3974	2.83771	40	61	87	245	62.7347	2.11689	37.5	56	77	182	54.9945	2.45264	36	46	67	102	50.0098	2.96479	32	42.5	58	0	.	.	.	.	.
Ifit3	1634	3	62	8.73053	48	55	83	175	81.5486	3.32016	49	70	104	130	74.4615	3.7801	42	66	91	119	66.3866	3.29686	41	56	88	177	60.1243	3.03356	37.5	51	71.5	113	53.0177	2.2678	35	48	64	50	57.92	4.90965	37	46	70	1	127	.	127	127	127
Shisa5	1619	78	74.2949	4.10833	49	66	88	122	91.6148	4.98101	48	79.5	118	99	101.202	5.16218	61	88	139	67	96.0597	5.78226	60	84	128	167	84.2575	3.64397	53	71	110	158	82.5316	2.89637	56	77.5	104	188	80.1809	2.8769	53.5	73	97	36	92.4167	8.84175	51.5	80.5	121
Ifit2	1395	2	108	65.0538	16	108	200	175	62.1829	3.57918	15	54	88	134	68.3955	4.1577	34	67	97	129	60.6512	4.16038	19	51	85	125	59.56	3.27749	29	52	79.5	87	54.9655	3.39279	37	50	66	33	56.4848	5.4152	37	46	65.5	1	12	.	12	12	12
Tbrg1	1256	64	67.4844	5.21678	39.5	51	90.5	139	77.5899	3.22665	49	74	95	122	74.4508	3.79019	45	61	95	74	63.6622	4.1663	37	54	80	148	57.8378	2.26395	38.5	51.5	69.5	92	53.9674	2.72778	35	45	69	39	46	2.81328	31	44	63	50	57.22	4.2321	38	48	66
Serpinb9	1175	7	88.5714	20.3589	53	56	123	23	91.8261	11.2867	48	71	129	33	90.9394	7.04973	56.5	90	115.5	41	97.5854	5.64822	69	102	122.5	66	80.6364	3.97511	54	77	100	79	69.962	3.26388	47	65	85	76	59.5263	2.89321	43.5	55.5	71	13	78.2308	10.858	48	69	98
Chmp4b	1173	46	90.9348	8.88465	48	69	124	63	107.873	7.58589	59	94	149	69	93.1594	6.48773	46	83	128	67	91.7313	6.01689	49	80	125	79	93.2658	4.85742	60	84	119	120	90.9417	4.19589	53	81.5	117.5	139	81.4964	3.29916	54	78	103	42	80.9762	7.96453	48	71	96
Ifit3b	1153	3	46.6667	5.42286	35	47	58	113	83.5487	4.4868	45	70	112	113	74.0708	3.90338	42.5	65	93	76	70.7895	4.92564	34.5	61.5	101.5	94	54.1596	2.78725	35	48	63	55	51.6545	3.26132	34	41	69	46	54.6739	5.40523	27	42	74	0	.	.	.	.	.
Samhd1	1015	11	70.7273	9.53557	46	76	80	69	71.8116	4.79289	50	63	89.5	68	86.4853	4.97065	55	81.5	120	56	77.0893	5.56755	42.5	70	104.5	116	70.9914	3.13071	43	69	94.5	101	62.198	3.00123	38.5	57	80.5	103	57.0874	2.47594	38	53	72	8	85.625	14.1641	61	77	96
H2-T22	955	19	66.4737	7.18893	42	56	83	60	87.2833	5.61175	56	73	116	52	99.0769	7.24971	57.5	89	144.5	44	97.2045	6.87947	57	86	131.5	90	85.0333	4.23219	53	82.5	113	125	96.08	3.52039	66.5	97	122	117	75.6838	3.04551	48	70	99	11	78.2727	14.1469	46	57	125
Ogfr	953	31	73.7419	5.37946	55	66	97	75	85.3733	5.04514	59	77	100	79	67	3.92785	40	60	85	70	71.3571	3.9583	46	66	89	86	60.5581	3.24919	39	53	83	67	68.0746	3.89345	38	63	91	50	56.54	4.69095	31	49	73	25	77.68	8.93205	50	64	90
Lap3	931	48	52.375	3.71355	33.5	45.5	66	71	82.5493	5.61969	45	75	116	60	72.65	5.65905	45	65	83.5	57	73.4035	5.16135	40.5	71	95.5	108	57.6389	2.79809	37	51	67.5	111	58.7928	2.4808	38	52	83	67	51.2836	2.96206	35	47	60	25	65.08	6.0372	47.5	58	67.5
Mitd1	865	21	102.143	12.9691	71.5	86	111	88	87.8523	4.79905	51.5	79.5	115	64	81.8281	5.28229	51.5	72.5	102	80	82.4875	4.27694	50	81.5	110	86	77.8953	3.87061	52	66.5	93	70	67.6143	4.45267	44	58	84	36	58.5556	3.09007	46	54	65.5	11	70	10.6235	42	60	75
Clic4	855	25	59.24	5.63369	42	52	69.5	73	74.3973	6.14373	31	70	97	43	77.7442	8.04161	39	56	114	58	67.2069	5.32604	42	67	85	65	83.5846	6.56715	52.5	73	93	96	65.6354	3.99623	41	57.5	91.5	98	67.4286	3.55486	45	59.5	84	13	57.9231	11.2031	32	50	57
Tgtp2	813	1	131	.	131	131	131	103	79.3883	5.32438	46	65	89	83	76.6386	4.7182	44	71	98	65	70.7538	4.13763	48	63	89	93	55.129	3.77127	34	45	64.5	50	52.56	4.2873	32	43.5	66	30	47.5333	4.56356	34	39	51	0	.	.	.	.	.
Ifitm3	801	52	91.3462	6.92894	54	76.5	127.5	60	93.45	6.87885	48	75	143	38	102.342	10.3353	50	76	159	50	95.44	7.33884	53	85.5	123	63	103.54	8.13956	56	81	149	81	89.7901	5.41849	48.5	82	127	83	85.6988	5.10581	45	85	115	9	83.7778	12.9145	42.5	87	107.5
Oasl2	784	8	71.375	8.96336	46	83	90	71	80.338	5.72458	49	65	97	75	85.68	5.30245	49	80	106	67	75.6567	5.69217	42	59	96	91	68.2967	3.33844	44	62	92	91	61.6484	3.54594	40	53	73	87	51.954	2.93587	33	46	62	0	.	.	.	.	.
Lgals9	756	14	57.2857	9.68137	35	51.5	59	32	109.438	10.8745	61	95.5	150	28	93.8571	7.21706	72.5	102.5	118	36	102.778	8.36311	60.5	101.5	132.5	78	94.1667	5.55684	56	84.5	127	102	81.6471	3.75501	50	77.5	102	171	55.9123	1.95558	38	51	72	2	69	14.1421	49	69	89
Stat1	741	4	33.5	6.83283	25	27	42	54	76.5	6.06304	41	77	99	35	78.9714	8.48071	34	77	118	34	79.1471	8.18579	39	88	110	45	75.5556	5.55996	42.5	80	94	81	63.963	4.27301	37.5	60	86	85	43.7059	2.86686	17.5	41	56	0	.	.	.	.	.
Bst2	728	34	64.9706	8.80159	33	43.5	76	64	117.984	8.94669	53.5	112	165	39	106.615	8.59954	53	101	151	49	119.367	9.06879	64.5	112	167.5	60	107.883	7.73294	63.5	93.5	153.5	100	113	5.69726	63.5	109	160.5	88	115.114	5.59434	72	117	159	3	116.333	5.81823	106	113	130
Irf7	696	2	52	3.53553	47	52	57	44	78.4545	6.28584	43	71	109	54	71.2593	5.36188	42	67	90	34	70.5588	6.64136	42	66.5	81	76	65.2632	4.60377	35.5	59.5	81.5	70	67.5286	4.46207	39	58	89	86	69.6163	4.26616	39	55	82	0	.	.	.	.	.
Ifi47	670	5	58.2	10.9887	33.5	51	65.5	63	83.6032	6.05611	43	81	109	50	90.66	7.74285	45	80	130	51	70.7059	7.59248	29	47	101	81	62.3827	3.89203	32.5	57	83.5	55	42.6727	3.42128	25	34	57	23	43.3043	5.10474	32	39	45	1	92	.	92	92	92
Lgals3bp	669	35	88.8286	8.2006	48	81	121	60	112.817	8.12211	61.5	89.5	148.5	39	101.667	8.70748	66	86	154	48	104.146	9.15596	63.5	82.5	136.5	86	93.2791	5.09753	52	83.5	135	89	105.865	4.99555	67	99	142	80	89.55	4.97917	52	82	116	2	139	65.7609	46	139	232
Phf11d	667	4	36.75	3.13	31	35	42.5	44	83.3636	7.79722	50.5	71	102	26	80	9.92531	38	62	118	33	76.7879	7.40024	41.5	62	108	78	58.2821	3.4278	36	51	70	79	59.1772	3.58712	34	50	80	56	50.7321	2.87422	35	47.5	61	0	.	.	.	.	.
Ifi35	666	11	124.545	28.4577	46	75	195	51	83.549	7.68514	41	65	119	36	103.889	9.16749	64	90	135.5	34	83.4412	7.11828	51	76.5	104	65	74	6.0039	44.5	58	92	60	56.0667	4.4872	33	45.5	67.5	56	54.0357	3.82401	33.5	43.5	64	2	90.5	1.06066	89	90.5	92
Ifi211	656	1	54	.	54	54	54	57	82.0702	6.19956	48	70	97.5	50	81	7.00805	44	65.5	106	53	72.6226	5.03029	43	65	96.5	89	64.0449	3.6269	42	58	81	90	50.8333	2.47193	34	45	70	54	56.7037	4.28828	39	46	64	1	84	.	84	84	84
Tor1aip2	607	27	88.0741	7.85097	64	81	105	76	75.3289	4.75014	46.5	63.5	89	48	77.8333	6.52821	54	65.5	84	65	71.8615	3.84036	48	69	89.5	63	61.8254	3.87955	37	58	80	54	60.963	5.2902	41	51	68	9	41.1111	5.62719	29	39	49.5	13	81.3846	13.825	43	69	99.5
Aida	591	21	67	12.2931	34	46	83	31	87.1935	8.88631	43	81	132	40	83.125	8.14472	36	68	131	42	84.4048	9.42015	58	75	99	38	79.3421	8.08124	40	68.5	122	58	79.3448	5.96405	44	64.5	115	49	78	6.69002	39.5	69	109.5	10	53.4	9.06444	39	48	59
Ifit1	585	1	50	.	50	50	50	109	52.3578	3.42978	24.5	46	65.5	64	63.3281	5.89442	23.5	54	92.5	62	37.2742	3.77607	18	28.5	45	46	34	2.56835	18	32.5	46	29	42.6207	6.88195	14.5	32	43	17	40.5882	7.93314	14.5	24	46.5	0	.	.	.	.	.
Serpinb1a	582	7	79.1429	10.6913	46	78	116	37	80.2973	6.82686	40	73	110.5	18	93.3889	9.7183	57	93.5	126	17	86	8.77358	56	81	95	28	64.1786	6.57202	40.5	56	79	58	61.4483	3.29849	42	56	79	36	51.75	4.70805	35.5	42	61	6	82.1667	18.2154	49	76	116
March5	566	24	87	9.41058	47	82.5	123	52	86.1923	7.37715	54.5	73	109.5	40	88.3	6.93742	53.5	79.5	121	40	76.525	8.20488	41	54	99	61	65.1803	4.75825	39.5	52	83.5	59	61.0847	4.47735	38	51	74	42	57.9762	4.36909	38	50.5	70	22	82	9.87672	43	73.5	105
Tcirg1	564	18	62.7778	6.18967	42	61	77	82	74.7439	4.87185	45	69.5	88	56	80.4107	6.81623	46	59.5	83.5	48	69.9583	6.51607	41.5	60	84.5	40	65.2	6.61345	33.5	55	85	35	70.7714	7.37576	46	64	85	30	73.0667	7.63543	42	53.5	99	6	36.1667	2.92894	32	35	45
Ifi44	541	4	77.25	13.273	60	88.5	94.5	30	100.267	9.87229	63	87.5	136	34	99.3235	9.33153	53	97	137	34	89.0882	7.70154	58	82.5	117	56	76.125	6.38627	40.5	65	97.5	65	71.1846	4.88218	40.5	57	100	57	70.6842	4.25569	40	69	92.5	0	.	.	.	.	.
Ifit1bl1	534	1	35	.	35	35	35	92	70.3043	4.00878	41	65.5	86.5	82	72.5366	4.52132	40	63.5	91	43	63.3721	4.76818	42	53	77	62	56.0484	4.26767	36	51	66	47	49.7447	4.34485	29	40	62	24	47.125	3.09699	36	48.5	53.5	0	.	.	.	.	.
Tor3a	520	4	83.25	34.9506	37.5	51.5	129	55	78.7273	6.3429	43	68	101	27	76.4074	8.92235	43	61	114	20	82.35	11.0707	39	78	111.5	52	81.1346	5.60649	47	70	114.5	64	72.0312	4.3702	50.5	63	82	27	59.0741	4.28444	45	54	79	1	27	.	27	27	27
B4galt5	504	26	21.9615	0.682583	20	21	25	63	30.2857	2.80745	21	23	26	30	33.1667	5.25803	21	24	26	28	27.7857	4.05742	21	22	24	38	22.5	0.507219	21	22	23	30	30.7333	6.25512	18	23	26	23	30.7826	6.66933	21	23	24	13	26.5385	3.43772	21.5	24	24
Rab21	499	28	72.8571	8.97214	38	61	103.5	34	81.6471	8.69901	42	69.5	114	34	75.3824	8.73851	22	69.5	96	34	80.0882	8.18455	46	74	105	52	90.1538	6.93479	54	96	108.5	43	84.9302	7.10657	50	75	114	49	69.0408	4.21901	47	67	85	21	102.571	14.4228	43	87	134
Ifi205	487	0	.	.	.	.	.	46	76.1087	6.53102	42	65	97	49	87.5918	10.3474	52.5	75	100.5	45	74.0889	4.80636	53.5	68	87.5	50	59	3.83625	40	53	72	53	48.2264	3.58427	29.5	44	56	36	45.8611	4.28357	33.5	43	52	0	.	.	.	.	.
Nmi	484	10	53.4	11.3747	35	45	50	34	92.6765	9.00084	59	83.5	112	29	81	8.56173	40.5	74	108	23	73.1739	8.0576	35	67	105	37	78.2973	9.04948	37	69	94	75	55.7333	3.52062	33	49	73	59	45.7288	2.58904	33	40	56	3	25	1.63299	23	23	29
Rsad2	455	1	40	.	40	40	40	58	63.8276	5.833	28	51.5	96	39	64.1026	7.23248	38	53	77	32	56.4688	6.81465	29	44.5	77.5	36	58.4444	6.70883	24.5	52	76.5	46	41.587	5.59212	15	26.5	46	35	37.2857	7.27529	14	17	44	0	.	.	.	.	.
Grina	452	27	59.2963	5.63007	36	50	77	28	77.9643	6.49735	56	74	102	17	84.4118	9.9775	51.5	66	104	30	74.4667	9.22433	41	59	92	41	75.0976	5.44376	44.5	74	103	39	78.0256	5.44647	54	74	85	64	66.875	3.16517	45.5	66	78	14	88.1429	16.5159	54	71.5	95
Ube2l6	443	6	91	15.2407	53	92.5	133	13	104.692	11.7193	67.5	109	129	14	122.714	7.05404	101	129	149	17	119	8.27971	96	123	139	40	89.5	5.01136	65	89	111	34	84.2941	5.91411	56	77.5	112	37	75.7027	5.98841	51	69	94.5	4	136.5	18.1607	111.5	151	161.5
Nub1	433	25	70.32	9.32982	37	52	88	38	65.2368	8.08588	36	43	80	37	69.7568	7.60871	33.5	54	85	39	64.0513	5.88839	39	49	82	45	57.0889	4.47355	35	53	68.5	22	59.3636	6.55824	37	52	71	11	45.0909	5.82876	31	37	56	10	63.4	8.64777	40	57.5	87
Fhl2	433	30	69.9333	4.77259	51	64	83	53	75.4528	5.15364	46	67	93.5	43	89.7209	6.78347	52	83	130	24	84.125	10.2849	45	73	102.5	28	67.3571	6.02105	44.5	56.5	81.5	19	71.9474	6.92959	49	61	89	6	72.6667	13.3264	45	71.5	89	15	68.1333	14.7123	29	49	75
Mvp	432	24	89.4167	11.7961	50	73	98	35	80.2857	6.86768	48	78	99	22	81.0455	7.35029	57	77	106	23	94.6957	11.7352	51	78	132	43	72.6279	6.43989	38	60	104	53	72.1698	3.85818	48	73	90.5	28	60.2143	4.62837	41	54.5	78	19	84.5789	11.093	41	61	140
Mlkl	421	8	89.5	21.9751	33	60	158.5	21	133.238	34.7405	64	90	137.5	18	94	12.0046	50	96	120	18	57	8.64849	18	51	80	40	68.775	5.95089	32.5	64.5	95	47	71.2553	4.98476	43	70	89	49	68.7755	5.6357	41.5	56	94	2	47	4.94975	40	47	54
Gbp3	416	1	81	.	81	81	81	19	102.368	14.0866	49	94	152	16	103.375	8.85953	70	95.5	140.5	23	97.913	15.5257	28	93	157	24	92.6667	6.54145	70.5	85	110.5	64	74.0312	4.92031	42	72	95	70	71.8571	4.5938	41	63.5	89	2	63	4.24264	57	63	69
Ppa1	413	13	78	12.7674	39	70	93	42	89.119	7.48447	57	77	111	21	92.619	13.6756	46.5	57	122.5	22	74.0455	6.27453	53	68.5	86	38	56.4737	4.52107	35	50.5	70	47	65.8085	5.13261	40	57	84	28	58.7143	5.15075	35	55.5	78	12	45.25	5.31524	29	43	58.5
Tapbp	412	6	95.1667	20.7249	45	113.5	141	37	49.2973	9.8986	14.5	17	53.5	28	78.25	13.7178	15	45	137	23	71.9565	13.1881	16	57	95	35	80.7429	10.3777	16	80	148	51	86.549	9.47853	16	88	148	50	77.88	7.91144	18	68.5	126	6	84.6667	24.4662	48	65	113
Casp12	412	9	41.1111	4.2352	29	39	48.5	19	79.3158	11.3891	36	69	137	15	92.7333	13.8995	36	83	134	23	69.1304	6.94409	35	73	90	34	75.0294	8.03845	39	61.5	99	42	67.4524	6.13567	41	63	85	42	59.2143	4.90494	35	55.5	73	15	44.4667	7.57356	23	35	51
Eif2ak2	409	5	65.8	18.677	25.5	48	79	39	44.5897	6.40664	14	35	65	34	67.5882	9.86905	16	52	98	26	48.1538	6.08488	28	44	57	24	47.875	6.61131	24.5	35.5	67.5	40	46.75	5.4271	18.5	39	60	38	28.8684	3.18914	14	18.5	43	2	32.5	14.4957	12	32.5	53
Rtp4	409	12	70.5833	9.06034	45.5	64	82.5	64	72.4219	7.43257	34.5	51.5	89.5	38	62.2105	7.6734	28	42	75	27	75.6296	10.9502	35	56	104	24	44.3333	3.15715	31.5	43.5	55	16	52.0625	6.23653	33	38.5	76.5	20	57.25	7.65535	36	44.5	62.5	1	25	.	25	25	25
Naa20	400	18	124.278	16.6685	68	115.5	167	35	99.8857	10.4719	45	90	139	42	94.881	8.03657	56	91	125	28	94.4643	8.97836	55.5	85	122.5	42	94.4524	13.2719	50	77	102	43	65.814	5.87579	37	51	81	27	57.7778	6.0003	35	48	81	12	78.3333	11.2881	46.5	74.5	92
Sptlc2	396	30	61.5667	5.8368	32	55.5	91	39	72.0513	6.22976	39	65	86	28	72.1429	7.45851	41.5	65.5	100	20	77.15	7.83686	53	77.5	99	58	62.8448	3.89745	43	56	79	52	61.0577	4.61213	37	56	73.5	26	55.6923	5.25131	36	49	74	4	111.5	12.0234	89	117.5	134
Parp3	379	11	92.4545	16.0471	40	87	150	34	80.4118	11.4921	21	55	111	26	67.0769	10.4755	17	48	118	26	72.7692	11.3698	17	63	107	35	54.2	6.29451	28	46	70	41	71.7073	8.31748	35	53	89.5	27	55.3333	5.18254	36	46	65	4	51	10.4523	35	42	67
Map2k1	371	12	65.8333	9.25775	39.5	51	94.5	38	91.4211	8.05956	61	82.5	113	19	78.0526	8.38561	43	74	118	31	81.0645	5.50129	55	78	104	41	68.8049	4.56941	50.5	69	78	42	65.0238	3.63553	45	64	84	26	55.5	3.96257	36	53.5	74	7	71.7143	11.3762	33	88	98
Ccdc25	362	11	80.7273	13.4497	31	88	117	21	60.2857	5.75192	43.5	59	80	20	82.9	12.0218	48	75.5	107.5	21	59.6667	9.24505	26	54	67	32	65.9688	5.63324	38.5	65.5	91.5	32	60.5938	5.075	35.5	62	77.5	24	50.5833	3.95061	37.5	45.5	61.5	5	42	4.84149	29.5	44	48
H2-D1	344	19	98.3684	17.6224	37	90	123	42	101.571	11.3834	47	82.5	122	20	108.8	15.0321	50.5	90.5	159	25	115.56	11.4313	58.5	113	157.5	27	104.185	12.1457	50	84	134	25	133.96	11.4531	82.5	126	171.5	32	150.094	8.17023	131	152.5	181	3	63.3333	8.48965	51	55	84
Iigp1	340	0	.	.	.	.	.	44	63.8864	6.31648	35	55	87	33	63.7273	7.4044	27	54	83.5	42	59.9286	6.89641	16	58	84	61	55.623	4.37942	29.5	46	69.5	27	47.8519	4.92821	29	46	68	11	68.8182	26.5289	16	43	62	0	.	.	.	.	.
Cmpk2	336	0	.	.	.	.	.	62	73.2419	6.03345	43	64.5	88	34	58.9118	5.35994	41	58	78	36	59.0278	5.46813	40.5	50.5	73.5	42	63.5476	5.5115	37	51.5	92	29	47.4828	5.14675	26.5	45	55.5	12	54.75	5.01958	42	52	71	0	.	.	.	.	.
Psme2	335	13	82.4615	12.4988	39.5	75	107.5	24	119.167	10.5409	67	115	159	27	91.2593	12.084	38	72	137	16	97.25	13.854	49	72	147	29	87.7931	8.1238	44	88	116.5	19	82.3684	9.00237	51	85	106	28	66.75	6.28097	39	63	87.5	7	45.2857	4.12911	34	46	53
Parp9	332	2	70.5	15.2028	49	70.5	92	42	81.619	6.41002	52	72.5	112	26	89.1923	9.25686	59	76	115	28	71.1786	6.48154	44	69.5	90	39	62.7436	3.61397	46	56	77	26	54.4615	4.36169	37	50.5	74	14	41.0714	7.13676	24	34	49	0	.	.	.	.	.
Trim12c	322	1	62	.	62	62	62	17	64.2941	9.58941	26.5	58	78	17	104.529	14.0173	66.5	90	117	13	66.6923	7.06469	48.5	54	84	30	62.8	8.01698	27	48.5	96	29	56.7241	6.60539	31	49	70	38	54.1842	6.30458	33	41.5	66	1	12	.	12	12	12
Daxx	317	4	118.5	53.1137	14.5	104.5	222.5	68	77.3088	7.32926	22	64	103.5	37	59.8919	8.05213	16	45	84.5	26	50.4231	7.00278	21	35	71	17	92.9412	20.7198	26.5	89	110.5	12	80.25	35.6912	17	28.5	79.5	9	33.6667	6.1884	13.5	38	44	1	24	.	24	24	24
Tspan31	308	6	105	9.03081	85	110	127	25	97.96	8.41741	61	91	123	14	93.4286	11.6092	57	103.5	118	11	111.364	15.8663	73	94	143	20	78.1	7.00603	58.5	82.5	103	22	82.5455	7.39296	49	84.5	115	37	78.0811	5.66671	53.5	70	102.5	6	105.5	13.6601	79	92.5	141
Psmb10	306	4	84.5	26.3308	41.5	66.5	127.5	5	148.8	25.1848	98.5	155	167	15	111.067	15.543	71	88	178	9	86.2222	9.78381	62	76	96	23	96.8696	7.26967	79	91	112	34	59.4412	5.12629	37	57	74	51	68.2941	6.20093	39	59	88	0	.	.	.	.	.
Dbnl	305	12	78.5	12.1447	43	60	112	24	78.0833	8.19424	49.5	58.5	109	19	64.2105	6.21257	51	55	83	13	102.769	5.37268	87.5	103	107.5	35	75.4571	5.14164	51	65	100	36	67.5556	6.3385	39.5	67	86.5	21	55.619	5.23354	41	47	62	11	90.4545	14.1113	35	100	118
Gnb4	304	3	36.6667	12.5551	14	30	66	26	54.6923	8.72793	14	50	79	13	55.2308	16.1941	13	20	70	18	56.4444	9.60267	15	53	90	31	55.3548	6.62486	15	52	77	31	57.2903	7.31756	15	57	69	14	44.6429	5.50752	37	40.5	53	3	47	19.5107	16	31	94
Psme1	294	6	100.5	19.679	48	109.5	119	20	104.35	12.9694	56	114.5	150	9	103.111	17.6876	64.5	87	105.5	9	89.8889	23.688	40	52	99.5	16	110.312	10.6271	65	119.5	144	27	114.296	12.403	76	96	140	30	87.1	5.11172	64	89.5	108	5	57.2	11.6941	26.5	72	73
Hnrnph2	285	19	67.1053	9.86274	39	55	95	28	82.25	12.0595	26.5	59	119.5	16	75.5625	10.5841	55.5	68	93	18	64.1111	15.224	17	44.5	92	29	66.4138	6.66446	39	66	85	29	63.4483	5.12358	38.5	65	75	9	31.7778	4.91603	19	27	31.5	10	57.8	12.275	19	51	94
Hoxb2	277	16	33.3125	10.2773	22	23	25.5	54	32	3.71544	21	23	26	8	26	3.81608	20.5	22.5	24.5	3	21.6667	0.544331	21	21	23	11	22.6364	0.564409	21	22	25	6	21.8333	0.760726	21	21.5	23	12	21.3333	1.02965	19.5	21	24	11	29.1818	5.41168	21	21	28
Cd47	275	7	61.2857	15.8921	16	43	110	30	98.7	11.0117	42	83.5	144	12	68.9167	19.079	16.5	31.5	117.5	17	89.5882	15.9734	52.5	68	117.5	23	83.2174	9.11468	40	80	123	36	81.0833	7.17768	48.5	78.5	105	25	58.92	6.53285	30.5	53	79.5	1	77	.	77	77	77
Lgals8	270	7	94	16.0344	38	101	132	24	86.875	11.7313	44.5	66.5	111	15	88.9333	15.8951	39	84	133	20	58.35	8.71558	25.5	60	73.5	27	76.2222	8.62213	35	68	103	24	49.5833	7.60754	17.5	34	88	14	48.0714	5.79361	38	45	66	2	132	29.6985	90	132	174
Psmb9	267	1	61	.	61	61	61	8	121.375	12.6959	113	123	131	12	84.25	15.6192	29	68.5	141	10	74.4	15.9814	24	54	125	15	80.9333	10.1982	45	78	112	27	77.4074	7.19458	51	70	103	36	54.25	3.94569	38	44.5	70	0	.	.	.	.	.
Rbms2	257	11	73.6364	19.0116	35	63	100	15	86.4667	10.6974	49	87	123	14	67.9286	14.8563	31	45.5	100	13	82.5385	10.6129	63.5	82	98	26	70	5.35983	46	61	103	16	57.625	5.76823	40.5	48.5	72	25	55.92	6.01117	34.5	48	72	10	71.2	6.45415	49	71.5	86
Myd88	249	1	12	.	12	12	12	33	59.8788	4.92604	33	55	74.5	28	64	6.49706	38	50.5	100	10	58	9.45304	35	48.5	77	33	75.9697	10.4166	41.5	55	89.5	19	67.2632	6.43477	44	62	90	22	59.3636	4.90932	40	58	75	7	81.8571	15.6875	48	61	140
Tor1aip1	249	5	58.2	6.78469	44.5	50	60.5	15	92.3333	13.4887	51	85	110	22	95.3636	14.1245	48	91	128	18	94.6111	9.26434	71	94	116	29	73.5172	5.95776	48.5	67	95.5	25	83.2	11.6136	45	69	88.5	14	58.7143	7.17025	42	49.5	64	2	88.5	26.5165	51	88.5	126
Trafd1	249	2	88.5	6.71751	79	88.5	98	27	66.1111	8.27499	36	61	84	23	93.2609	10.2911	57	78	120	18	91.6667	9.07989	60	85	120	27	73.3333	6.85535	47	71	91	13	64	10.8464	37	55	69.5	13	75.5385	8.42131	53.5	75	80.5	3	73.3333	34.0664	12	55	153
Xaf1	244	6	88.8333	11.6319	75	97	109	20	90.25	11.8991	40.5	89	136.5	9	107.222	26.9438	33.5	101	117.5	8	79.375	22.1669	28.5	53.5	134	17	88.1176	9.91028	49	93	116	15	69.5333	11.0465	31	51	100	21	58.1905	6.50505	39.5	54	73	1	43	.	43	43	43
Mcm6	242	11	74.4545	10.5716	50	73	102	26	86.4615	10.9066	41	83	95	14	79.7143	6.74569	55	77	98	12	79.6667	11.0625	54	71.5	98.5	25	73.84	7.55898	42	75	86	28	64.6071	5.02934	44.5	61.5	82	19	57.9474	6.38622	42	55	63	8	46.375	3.69094	35	48	56.5
G3bp2	240	11	71.3636	11.3831	32	60	94	14	81	15.5724	36	68.5	130	17	101.176	16.9165	50	95	110	22	84	9.7988	44	84	119	26	66.8077	7.04445	45	61	96	25	49.84	6.39116	25	39	62	23	59.3478	5.70431	30	60	85	6	73	8.51795	52	72.5	88
Trim30a	237	2	30.5	9.54594	17	30.5	44	27	70.9259	8.39523	18	70	105	14	70	12.8198	18	54	118	25	47	11.9427	16	25	47.5	28	71.8929	16.6918	17	19.5	108	30	45.7667	5.99568	18	24.5	76	12	54.8333	12.1534	16.5	40.5	88.5	1	85	.	85	85	85
Isg20	235	3	47.3333	10.5444	32	37	73	20	63.4	7.68388	36	51.5	89	11	116.455	13.694	72	125	153	21	68.0476	9.70809	32	62	72.5	21	66.0476	7.22759	39.5	61	84	39	46.3846	3.82604	29	41	60	32	46.4688	6.12595	22	33	57	4	32.5	3.21131	27.5	33	37.5
Tmem184b	229	10	78.6	12.6856	54	83.5	111	15	85.4	10.6324	55	77	107	9	88.2222	14.8089	47.5	91	107.5	14	103.929	16.3412	54	93.5	143	23	87.9565	8.13903	61	86	112	31	73.2258	5.77639	47	76	98	23	78.0435	8.00791	51	76	107	3	110	24.1799	76	85	169
Tmem140	226	0	.	.	.	.	.	21	81.6667	8.25729	48.5	78	100.5	19	91.4737	13.7308	51	71	121	5	66.8	13.2224	41	51	68.5	23	62.5217	6.07604	44	55	87	23	53.6087	5.2685	34	53	67	11	63.4545	7.17245	42	69	77	0	.	.	.	.	.
Gla	225	20	61.8	8.94751	30.5	51	80.5	13	74	15.5716	27	52	102.5	17	78.5294	9.95739	40.5	76	92	6	73.3333	15.9821	43	68	72	20	86.9	9.6387	49.5	78	131	19	67.4737	8.14324	37	61	89	23	73.6522	7.71114	32	85	100	7	54.5714	11.8973	26	52	66
Tap1	217	0	.	.	.	.	.	14	78.2143	10.9982	41	65.5	113	19	88.5789	13.3103	50	63	107	12	75.8333	7.32465	53.5	81	92.5	20	89.25	10.199	45.5	87.5	123	18	68.9444	7.82228	45	64.5	80	17	49.5882	5.4741	32.5	41	57.5	0	.	.	.	.	.
Ifi204	215	0	.	.	.	.	.	21	95.9524	12.3858	56	88	113	14	62.0714	7.83403	42	58.5	82	12	77.6667	12.6202	37.5	68	98.5	39	82.3077	6.83314	51	69	115	39	56.0256	3.53985	38	51	72	25	52.36	3.82952	37.5	49	62.5	0	.	.	.	.	.
Rbm43	207	4	69.75	8.28685	53.5	71.5	86	27	86.8519	13.0005	32	74	122	24	56	4.66815	39	57	70.5	18	64.8333	8.45659	41	58.5	74	22	55.4091	7.23418	33	47	66	11	35.1818	6.12517	23	31	38	10	47.8	11.7267	29	31	48	3	85.3333	17.9216	48	84	124
Parp12	196	1	74	.	74	74	74	12	74.4167	14.6038	37	66	98	20	76.15	8.92952	53.5	72.5	111.5	15	86.2	14.5508	38	76	139	31	77.2581	11.6016	23	75	112	33	66.4242	5.1118	43.5	63	82	12	85	18.7979	46.5	81.5	91	1	141	.	141	141	141
Twist1	196	17	65.1176	7.31112	37.5	54	81	36	75.1389	7.28532	39.5	65	95.5	19	83.8947	8.08744	49	86	107	18	78.3333	7.7372	46	74	109	15	61.8667	7.47194	29	64	81	6	46.1667	7.29313	37	39.5	48	9	53.6667	11.8946	30.5	37	51.5	10	102.4	19.3759	60	81	129
Apol9b	195	6	46.6667	8.83071	23	48	57	25	83.88	9.20666	44	70	99.5	25	70.88	5.74479	50.5	63	85	13	89	9.37768	57.5	88	98.5	29	62.3793	5.86621	37	60	91	24	46.9167	5.24402	30.5	37.5	52	9	64.1111	16.221	32	47	54.5	0	.	.	.	.	.
Katna1	195	4	167.75	65.9928	77	101.5	258.5	31	68.1935	7.43804	42	55	91	21	72.8095	12.8712	33	58	91.5	20	72.85	9.22016	32	61	116	21	55.0952	5.4805	34.5	49	68	9	64.1111	13.6141	29.5	64	70	11	51.5455	7.42496	37	39	65	5	112	17.4333	81.5	91	106.5
Herc6	193	1	81	.	81	81	81	13	68.8462	15.719	30	58	66	13	86.1538	15.4391	46	78	92	19	61.4737	8.16464	38	47	71	25	80.56	8.66756	54	64	103	22	76.6364	9.03312	41	73	92	17	48.9412	8.33198	26	40	53.5	1	37	.	37	37	37
Gbp7	187	0	.	.	.	.	.	27	72.963	13.3377	15	58	114	8	70.5	18.1004	14.5	72	116.5	13	69	16.1824	18	49	78.5	15	49.6	10.0429	13	42	92	25	53.24	9.21812	16.5	24	90	13	59.1538	16.0815	19	31	72.5	0	.	.	.	.	.
Caml	184	7	91	16.7722	55	85	108	22	68.2727	6.54614	47	59	89	21	103.429	17.3631	50	64	134.5	13	68.7692	10.4401	37.5	69	73.5	13	63.3846	12.0387	27	49	72.5	3	61	6.16441	52	55	76	8	49	5.87899	34	47.5	65	6	70.1667	19.3856	49	51	53
Acaa1a	178	10	81.4	15.4623	46	70.5	93	7	97.5714	20.4049	35	84	156	12	106.667	13.5233	73.5	107	124.5	9	98.3333	23.1362	44	79	84.5	7	111.571	15.3355	67	124	154	27	85.4815	4.83198	70	90	98	16	64.125	6.93208	35	60	85	6	101	27.2356	57	72	132
Scarb2	176	14	62.7143	12.0244	15	62.5	94	17	97.6471	15.8494	25.5	134	152.5	11	70.2727	14.6378	16	60	90	9	93.8889	17.5488	50	91	108	19	98.1579	13.649	16	121	146	12	81.5833	19.2871	17.5	63	139	5	53.4	20.091	15	21	60.5	9	73.5556	16.2671	14.5	96	108
Trim21	175	0	.	.	.	.	.	24	107.833	9.82939	62	107	141	21	90.1429	9.56901	56	81	109	18	84.5556	10.5626	47	75	112	11	86	12.1594	49	81	138	4	78	16.7817	46	72.5	110	1	52	.	52	52	52	0	.	.	.	.	.
Gvin1	174	1	15	.	15	15	15	30	59.1	11.831	13	48.5	75	12	69.8333	12.8094	18.5	82	102.5	23	63.6522	9.50925	23	58	112	17	70.9412	8.76035	47.5	76	88.5	12	43.4167	6.32835	31	40.5	46.5	5	39.4	11.8814	13.5	36	42.5	0	.	.	.	.	.
Hspa1b	168	10	83.1	8.58539	57	81.5	107	21	78.5714	7.6658	48	78	90.5	21	85.4762	7.00133	62	88	96	24	89.0833	8.01494	60.5	97	109	5	83	15.995	61	68	69.5	8	55.875	10.5496	36	43.5	69.5	1	141	.	141	141	141	9	84.1111	6.65823	66	79	94.5
Plscr2	167	3	67.3333	16.5081	33	66	103	23	80.7826	8.48037	50	67	96	11	100.636	16.7373	61	77	142	14	94.1429	16.8762	34	75	135	13	83.3077	11.9334	44.5	83	97	28	66.6071	4.27867	52	70	81.5	17	49.8824	5.38734	33	40	66.5	0	.	.	.	.	.
Plod3	166	15	89.8	15.6558	52	63	109	16	115.5	19.693	56.5	87.5	179	8	100.625	25.8976	38	82	154.5	9	126.889	12.0303	95.5	135	153	9	97.3333	16.017	50	82	116.5	13	120.692	17.5578	60	111	137.5	20	123.4	10.8426	79.5	125	163	8	93.75	15.543	61.5	89	123
Mx1	164	0	.	.	.	.	.	13	76.0769	15.3177	53	59	77	7	88.8571	18.3208	48	86	149	7	46.8571	11.6364	13	35	89	14	79	6.88165	56	81.5	95	19	77.2632	9.4088	45	72	100	13	56.3846	4.97156	45	57	65	0	.	.	.	.	.
Ifi203	163	6	35.1667	7.20886	20	30	52	12	84.75	10.2328	63.5	77	102.5	14	69.0714	10.0333	53	62.5	88	14	71.0714	10.4058	36	66	101	21	61.1429	7.04675	40	51	68.5	18	57.5556	7.44246	46	53.5	63	26	57.8462	6.93582	39	55	64	0	.	.	.	.	.
Ddx24	163	16	66.9375	9.13034	37	56.5	94.5	21	61.4286	8.6059	39.5	53	65	16	59.25	9.346	33.5	50.5	96	9	62.8889	13.8408	17.5	63	81.5	24	53.5417	4.73718	36	47.5	73.5	12	45.25	5.55543	30	38	64.5	3	30	5.31246	17	36	37	5	53	24.3754	12	13	46
Phf11a	162	0	.	.	.	.	.	9	89.5556	12.7648	51	95	107	4	91.25	8.52478	78.5	97	104	8	99.5	11.9072	73.5	96.5	124	15	82.0667	8.03961	67	74	101	29	70.2414	8.14679	36.5	50	95.5	21	55.2381	4.95737	38.5	49	60	0	.	.	.	.	.
Nampt	162	2	115	44.5477	52	115	178	13	71.8462	10.1082	46.5	54	86.5	19	76.8421	5.89956	60	72	99	11	93.0909	13.2175	46	86	138	26	69.3077	8.16033	38	49.5	101	10	65.6	8.45837	39	70	87	11	46.8182	4.58135	35	41	61	1	49	.	49	49	49
Stat2	161	2	30	11.3137	14	30	46	25	77.28	13.9237	18	60	106	9	85.8889	15.7617	49.5	67	89	12	44.6667	6.48324	23.5	49	60.5	11	95.2727	13.1023	58	84	121	16	82.0625	12.6918	31	86	121	9	59	8.77426	37.5	57	73	0	.	.	.	.	.
Snx10	160	4	86.5	32.0654	27	76	146	19	71.8947	13.0439	25	55	118	15	72	16.6033	23	48	91	8	116	32.9308	50.5	95.5	146.5	16	68.8125	8.54593	42	67	101	12	59.0833	17.2994	22.5	35.5	65.5	8	69.875	34.2611	15	39	57.5	2	30.5	11.6673	14	30.5	47
Pnpt1	158	3	149.333	45.3929	49	158	241	16	78.375	11.7327	42.5	71	102	13	86.3077	11.2924	61.5	80	97	15	76.6667	11.1963	45	67	90	17	54.4118	7.18999	31.5	46	58	12	62	7.30487	43	59.5	81	11	59.2727	7.30118	32	52	89	4	49	7.9136	33.5	47	64.5
Aftph	158	3	88.6667	19.8737	40	112	114	16	63	6.53775	40.5	59	86	24	51.7083	9.45833	25	38	52	8	40.75	5.23137	26.5	41	51	16	49.25	11.8277	23	35.5	43.5	15	51.8667	9.61705	19	40	69	6	50.3333	10.7514	34	44.5	46	0	.	.	.	.	.
Ifih1	156	1	35	.	35	35	35	18	100.167	9.49894	70	92.5	115	9	100.667	12.9843	63	96	123.5	12	87.4167	10.1827	57.5	79	111.5	21	82.2381	7.54184	63.5	77	85.5	14	67.0714	8.19187	37	62.5	94	11	55.0909	4.71056	49	51	57	0	.	.	.	.	.
Casp4	156	3	36.6667	3.03071	32	34	44	7	78.5714	20.1958	48	66	79	8	81.875	12.6311	43	83.5	108.5	11	51.0909	12.8619	16	35	86	6	68.6667	16.855	26	66.5	99	13	37.8462	4.87336	26	30	41	13	38.5385	5.53698	22.5	34	41	0	.	.	.	.	.
Parp10	156	2	116	38.1838	62	116	170	27	94.7778	11.0427	55	79	123	18	96.0556	7.49175	76	90.5	109	12	96.5833	17.7578	65	77.5	118	19	63.5263	8.47887	38	49	84	13	67.0769	7.61458	44	52	82	6	52.3333	7.98842	39	45	64	0	.	.	.	.	.
Apol9a	150	6	45.5	1.67912	45	45.5	47	17	74.2941	8.71373	46	66	103	21	108.524	13.1757	61	89	134	14	60.7857	8.62967	36	52.5	77	23	61.9565	5.18121	41	59	78	11	51.5455	7.97865	29	49	62	4	32.75	5.74864	21.5	32	44	0	.	.	.	.	.
Plekha4	148	0	.	.	.	.	.	9	79.8889	18.7725	43.5	59	71.5	12	109.583	20.9352	70	81	132	10	62.8	9.9366	42	46	91	14	92.4286	21.7904	36	51	130	14	78.6429	12.4321	41	54	119	17	81.1176	6.01088	65.5	83	99.5	1	46	.	46	46	46
Vwa5a	147	4	79.75	9.17452	66.5	86.5	93	13	93.1538	11.5916	57.5	105	121.5	5	86	12.093	54	96	104.5	11	58.6364	15.8694	12	47	92	9	70.3333	20.5029	12.5	66	78	19	83.1053	12.5995	45	68	107	8	87	11.1747	64.5	88	114.5	2	136.5	3.88909	131	136.5	142
Pxk	146	3	75.6667	22.0219	42	56	129	14	96.7143	18.3065	49	76	127	10	65.1	9.41111	50	60	72	6	80.5	10.5666	64	83.5	94	12	85.4167	8.83605	60	87.5	98	15	55.8	6.34574	40	49	56	8	50.875	5.76476	43	50.5	57.5	4	76.5	26.5765	32	63.5	121
Ddx58	144	4	48	9.30726	32.5	54.5	63.5	23	96.2609	9.33684	58	92	126	7	71.2857	18.4044	51	53	67	11	156.455	55.2966	54	76	137	12	59.6667	10.2166	28.5	52.5	95	11	53.6364	8.85631	31	46	80	4	55.25	8.13461	43.5	55.5	67	1	95	.	95	95	95
H2-Q4	143	2	106	37.4767	53	106	159	13	124.462	17.3409	71.5	119	146	7	171	27.3391	72	188	241	3	48.3333	14.1605	30	32	83	10	94.6	16.4756	55	90.5	139	13	95.8462	18.0272	35.5	93	144	26	89.3462	10.7695	53	80.5	115	0	.	.	.	.	.
Sp100	143	1	154	.	154	154	154	12	95.4167	19.4634	36	83	132	4	130.25	23.3328	93.5	118.5	167	10	66.3	8.91297	46	52	87	23	63.9565	7.48975	32	53	100	15	75.6	7.49744	50	66	107	18	61.0556	5.72975	43	55.5	76	0	.	.	.	.	.
Slfn9	140	2	20	1.41421	18	20	22	21	66.6667	11.2285	20.5	54	75	14	77.6429	15.2622	41	60.5	85	13	33.3077	5.98952	14	32	39	14	40.9286	6.20851	20	32	62	13	37.3077	6.86677	22.5	36	38	3	63.6667	28.7608	25	32	134	2	21.5	6.71751	12	21.5	31
Tap2	138	0	.	.	.	.	.	8	100.75	18.3956	60.5	92	119.5	10	107.1	20.7612	56	118	144	7	102.571	16.1938	57	104	145	15	92.3333	9.31315	58	93	125	17	90.6471	8.57006	61	93	104	14	71.2857	5.9517	55	67.5	89	2	63	27.5772	24	63	102
Plgrkt	138	11	82.1818	12.7187	47	84	107	10	91.4	19.9174	53	77.5	107	3	114.333	33.0734	38	129	176	8	71	7.67708	50.5	75	85	10	98.3	9.31026	69	107.5	127	8	94.875	13.6821	54	99	132	8	56.5	4.73352	45.5	54.5	65.5	5	60	9.7242	35.5	71	74
Rnf213	134	3	12.6667	0.272166	12	13	13	23	82.1304	14.4381	18	57	136	8	67.75	18.4964	14	57.5	113.5	9	75.8889	19.3253	28	45	101	9	73.1111	19.1707	21.5	35	105.5	11	77.9091	13.1158	60	75	93	9	43.7778	14.7596	13	14	45	0	.	.	.	.	.
Trim26	134	5	52.4	8.26366	40.5	45	46	11	75.0909	8.8686	53	75	90	11	63.4545	13.178	19	54	103	10	67.5	8.19543	49	59	93	16	67.8125	8.14	36.5	66	90.5	6	53	13.9583	36	37.5	45	2	40	4.24264	34	40	46	5	153.8	29.1868	102	108	150
Hmox1	133	9	62.1111	4.77763	52	59	61	12	60.5	6.54419	38	58	80.5	11	69.6364	6.8082	49	67	89	14	62.7857	8.66448	32	64	79	12	50.8333	6.09626	34.5	52.5	67	6	53.6667	13.0078	37	41.5	47	0	.	.	.	.	.	9	85.8889	22.638	37	44	102.5
Dok1	132	5	101	14.7105	70.5	103	112	22	79.7727	10.8428	41	62	115	13	74.7692	11.5278	37.5	62	97	11	94.1818	20.0614	46	80	107	14	67.1429	8.5767	49	60.5	66	8	63.125	8.98512	39.5	69	81.5	7	62.8571	9.09009	38	55	84	2	78.5	10.9602	63	78.5	94
Rnf19b	130	7	66.4286	15.4482	32	47	111	25	74.6	9.01749	45.5	63	85	18	58.3333	6.36299	37	59	72	14	69	9.46314	47	66	77	10	56.3	5.84303	38	57.5	64	4	62.5	14.3723	43.5	47.5	81.5	7	27.4286	4.06507	21	21	32	1	59	.	59	59	59
Ifi207	129	0	.	.	.	.	.	21	44.5238	4.21401	30	38	52	18	68.7778	10.8299	33	54	88	14	52.7143	8.52932	32	43.5	70	15	49.4667	5.78494	34	45	68	14	51.5714	5.93392	34	45.5	70	9	56.2222	7.02865	36.5	51	69	0	.	.	.	.	.
Samd9l	123	1	49	.	49	49	49	11	61.9091	8.40253	35	66	90	10	58.2	4.20904	55	58	62	10	53.9	8.26614	27	59	76	19	50.2632	7.85881	24	40	79	8	53.125	10.1496	38	40	66.5	6	51.3333	4.40118	47	52.5	62	4	44.75	12.0435	25	35	64.5
Nlrc5	121	0	.	.	.	.	.	18	54.5	15.1768	14	18.5	80	8	15.5	1.55121	13.5	14	14.5	12	33.8333	6.70078	14	28	45.5	9	35.3333	14.3329	13	14	28.5	13	37.6923	10.6273	13	14	40.5	13	24.7692	9.3373	13.5	15	15.5	0	.	.	.	.	.
Rnf114	121	6	113.333	25.7829	49	106.5	158	19	73.3158	8.85808	47	61	98	8	70.25	12.7092	49.5	54.5	77	4	60.25	8.08838	45	59	75.5	10	65.9	10.0364	41	53.5	86	8	60	8.66206	40.5	45	86.5	11	66.5455	11.3846	38	48	81	5	59	5.92621	47	53	60.5
Rmdn3	120	4	55	20.6004	26.5	42.5	83.5	18	87.1111	14.5994	14	74	148	8	68.625	12.5448	38	77.5	98.5	10	68.2	9.73016	52	60	97	13	64.7692	10.1644	33	59	82	13	51.3077	10.674	16	44	67	6	74.8333	14.1685	41	70	88	4	112	24.4643	65	120	159
Gm20559	118	1	13	.	13	13	13	10	112.2	23.8955	56	83.5	187	8	54.5	11.2347	27	48.5	82	6	70.3333	9.27861	50	69	76	22	100.227	19.4299	42	78	119	16	55.5625	10.7067	12.5	41.5	84	8	47.875	14.2494	14	24.5	88.5	0	.	.	.	.	.
Rab29	114	2	44.5	9.54594	31	44.5	58	9	50.7778	8.51691	32.5	45	59.5	4	110.25	30.14	56	95.5	164.5	8	64.125	10.0381	39.5	57.5	94	10	71.7	11.8111	33	66	96	16	87.8125	10.0204	59	78.5	108.5	8	56.125	12.7885	37.5	44.5	59.5	7	65.2857	23.2236	28	31	73
Sppl2a	112	5	52.4	9.28483	32.5	51	54	11	70.6364	11.8874	46	69	104	4	84.25	36.9161	30	59	138.5	1	179	.	179	179	179	6	114.5	15.7511	81	121	150	14	75.5	10.7811	36	78	109	17	69.3529	7.26843	42.5	66	90	4	40.25	16.9903	14	25.5	66.5
Pml	112	4	58.75	13.9435	34	66.5	83.5	14	93.5714	11.9969	57	82	139	9	73.3333	16.9356	29.5	55	91	11	101.636	11.7236	84	103	133	13	58.9231	10.274	29	43	71	5	53.4	12.1806	21.5	63	68	4	48.75	15.642	24.5	42.5	73	3	70	21.2027	19	87	104
Pcgf5	110	6	81	16.9	37	79	109	11	100	14.2039	42	94	160	12	53.3333	9.0203	33.5	46	59.5	11	50.0909	10.0136	29	36	75	9	85.1111	14.7451	50	75	94.5	10	67.4	13.5759	39	66.5	73	6	70.1667	11.9499	38	72	81	2	46.5	0.353553	46	46.5	47
Irf5	106	2	142.5	10.9602	127	142.5	158	18	87	13.8042	51	68.5	106	10	80.6	14.712	45	57.5	124	9	56.8889	8.15505	39	48	54	8	78.5	10.5549	45.5	79	105	11	39.7273	5.72091	21	38	57	5	61	11.4298	31.5	71	73	0	.	.	.	.	.
Uaca	101	5	122.2	24.8795	73.5	91	125.5	15	75.8667	7.41642	52	57	98	4	113.5	23.392	79	111	148	8	92.125	9.6476	76	90	113	3	145	42.8978	89	96	250	11	73.5455	9.30863	45	71	91	9	43.8889	7.50382	25.5	42	47.5	3	109	20.3361	68	105	154
Stoml1	99	1	58	.	58	58	58	5	153.8	44.894	43.5	187	187.5	4	58.5	7.00446	49	53.5	68	4	142.5	36.6239	89.5	107	195.5	2	99	2.82843	95	99	103	6	88.8333	19.8864	53	71.5	127	14	55.5714	8.10374	42	46	57	4	69	12.0675	47.5	61.5	90.5
N4bp1	99	0	.	.	.	.	.	20	85.7	15.4141	49	68	104.5	8	55.625	9.2296	33.5	58	76.5	7	73.1429	9.30532	47	74	95	9	67.1111	14.1835	30	38	89.5	7	66.7143	9.98308	48	55	80	2	50	16.2635	27	50	73	2	43	4.94975	36	43	50
H2-T23	98	1	54	.	54	54	54	6	70.1667	19.885	32	51.5	83	3	76	21.853	43	56	129	11	111	41.6191	28	47	146	6	147	19.6836	134	153.5	186	4	93.75	14.8761	68	88	119.5	10	95.7	20.0769	38	64	160	0	.	.	.	.	.
Irgm2	98	0	.	.	.	.	.	16	91	11.8529	49.5	70	127	8	55.25	8.55999	38	63	72	2	85.5	16.617	62	85.5	109	11	53.5455	5.25288	38	45	72	3	45.3333	15.3357	12	47	77	8	46.5	9.5443	20.5	42	68.5	0	.	.	.	.	.
Trim12a	96	1	158	.	158	158	158	8	73.875	12.8202	43	64.5	95.5	6	52	7.35225	40	44.5	76	7	48.5714	8.4512	38	42	56	6	60.3333	10.5163	44	52	55	8	52.25	10.8134	24.5	42	76.5	4	39.25	6.7303	29.5	38.5	49	4	74.75	6.58953	65	71.5	84.5
Etnk1	94	3	98.3333	25.2645	63	72	160	10	100.7	20.3716	13	120	134	10	129.8	24.1188	59	98.5	190	4	112	21.783	81	93	143	9	95.1111	7.78166	72.5	89	105	8	47.625	9.54584	19	49.5	74.5	4	77	29.6057	34	58	120	2	61.5	10.253	47	61.5	76
Tlr3	92	0	.	.	.	.	.	9	76.4444	19.3379	18.5	56	107	7	85.5714	16.6413	44	63	130	4	33	10.0187	13.5	30	52.5	10	92.3	18.0699	33	93	128	9	74.7778	15.0594	32	71	85	10	95.7	50.4805	37	44.5	54	1	61	.	61	61	61
Rnf139	91	4	79	20.7153	51	59.5	107	15	85.4	11.3238	37	91	112	17	66.8824	14.0565	39	50	64	2	113	40.3051	56	113	170	3	59.3333	8.43713	44	55	79	3	37.3333	5.50421	27	35	50	2	49	.	49	49	49	5	60	7.02567	41	70	71.5
Apol6	90	0	.	.	.	.	.	12	60.4167	16.1639	12	43	86.5	9	65.8889	10.5168	42	66	74.5	9	57.3333	6.34988	39	58	61.5	8	53.75	8.85782	32	51.5	66	12	71.5	8.52977	45.5	68.5	88.5	9	75.5556	14.523	42.5	70	90	0	.	.	.	.	.
Il15ra	88	4	24.75	0.892679	23.5	25	26	10	64.3	7.34173	49	62.5	80	13	61.2308	10.6489	34.5	53	66.5	7	68.4286	11.2791	45	54	100	1	51	.	51	51	51	5	40.8	8.253	21.5	40	45.5	3	52.3333	10.856	30	51	76	0	.	.	.	.	.
Zc3hav1	88	2	158	15.5563	136	158	180	14	80.8571	16.972	39	58	123	9	34.6667	3.61068	25.5	36	37	3	71.6667	35.2462	28	29	158	14	57.9286	8.8528	31	45.5	89	4	116.75	42.4329	55.5	77	178	5	55.4	10.6943	33.5	42	60	0	.	.	.	.	.
Sdc3	86	3	158.667	20.7971	123	145	208	7	138.571	22.1377	62	174	185	5	91.6	16.1508	55	79	106.5	4	66.5	19.276	37.5	51.5	95.5	1	37	.	37	37	37	9	93.6667	8.80516	85.5	101	108.5	11	118.364	10.9471	107	126	152	1	148	.	148	148	148
Zcchc6	85	2	52	21.9203	21	52	83	13	83.3846	12.5668	43.5	75	100.5	10	103.9	21.9866	53	77.5	107	7	68.2857	14.7617	37	46	120	7	67	20.6625	31	55	72	2	84.5	19.4454	57	84.5	112	5	52	6.4436	35	58	60	3	54	9.4163	37	49	76
Inpp1	80	3	51.6667	16.0854	16	55	84	12	68.4167	11.6604	35	64	102.5	3	89.3333	7.6352	79	81	108	11	71.7273	7.68931	42	81	91	12	56.75	8.49929	30	48	76.5	4	46.5	13.2689	26.5	38.5	66.5	2	68.5	5.3033	61	68.5	76	0	.	.	.	.	.
Znfx1	70	2	56.5	6.71751	47	56.5	66	9	109.444	24.595	39.5	109	131.5	5	88.2	16.9597	52.5	87	101.5	7	72.7143	13.9646	39	76	99	7	59.7143	11.5064	33	61	94	2	49.5	7.42462	39	49.5	60	1	20	.	20	20	20	1	86	.	86	86	86
Dcp2	69	1	49	.	49	49	49	12	96.5833	13.2374	47.5	102.5	135.5	9	87	6.44444	73	88	99.5	6	47.6667	13.4612	14	37.5	87	7	53.4286	4.40249	44	57	65	4	45.75	4.78768	37	43	54.5	5	45	9.97196	23.5	37	50	0	.	.	.	.	.
Slc25a22	68	0	.	.	.	.	.	8	110.125	18.7753	71	102	128.5	8	95.875	15.5226	57	91.5	129.5	5	71	15.1341	35.5	79	82.5	7	59.4286	7.82163	34	58	78	5	66.2	25.744	28	46	48.5	4	64.25	21.3435	23	57	105.5	0	.	.	.	.	.
Trim56	67	5	32.6	16.4137	14	14	14.5	5	40.4	23.4156	12.5	13	16	4	66.75	15.872	43.5	81	90	9	41.7778	9.36605	13	41	50.5	5	47	14.4444	12.5	50	56	3	106.667	8.43713	87	111	122	3	43.3333	23.1533	13	17	100	1	13	.	13	13	13
Irf9	67	3	112	32.7244	57	89	190	7	104.286	9.46037	85	95	119	10	56.2	11.7871	34	44.5	48	9	56.7778	5.39496	49.5	59	62	3	47.6667	8.08748	32	45	66	4	41	9.08295	24	37	58	1	57	.	57	57	57	0	.	.	.	.	.
Irf1	63	0	.	.	.	.	.	16	74.5625	13.1277	36.5	72.5	89.5	5	71.4	17.8317	36.5	73	73.5	7	68.4286	11.9981	47	80	97	1	36	.	36	36	36	0	.	.	.	.	.	0	.	.	.	.	.	1	49	.	49	49	49
Sp140	62	2	58	1.41421	56	58	60	6	75	13.6239	50	69.5	79	9	77.2222	11.3309	45	88	94	8	99.375	13.5531	70.5	99.5	123	9	69.2222	8.032	50	63	74.5	3	41.6667	3.31104	35	41	49	2	40	2.82843	36	40	44	0	.	.	.	.	.
Dtx3l	61	0	.	.	.	.	.	7	89.5714	23.3298	25	69	144	9	110.556	18.2926	73	112	123	2	74	3.53553	69	74	79	10	102.3	12.3378	74	93.5	133	2	256	81.3173	141	256	371	2	18.5	0.353553	18	18.5	19	0	.	.	.	.	.
Slc25a28	61	8	46.25	11.0252	28	35.5	46.5	12	53.4167	5.35602	36.5	55.5	71.5	6	60	13.8844	30	55.5	75	4	46	7.17635	33	45	59	7	56.4286	12.0811	37	42	97	3	81.6667	21.7375	47	64	134	1	53	.	53	53	53	0	.	.	.	.	.
Dse	58	3	81.3333	44.2878	16	39	189	7	69.4286	15.2702	18	66	119	5	102.2	21.8767	56	101	107	7	68.2857	17.7255	19	76	92	4	55.75	18.4098	19	55.5	92.5	6	70	5.79751	56	69.5	87	1	68	.	68	68	68	1	124	.	124	124	124
Mafk	57	3	97.6667	28.7763	52	74	167	6	62.1667	11.507	39	55	97	5	77	10.9289	58.5	67	72.5	2	104	42.4264	44	104	164	4	98	40.1622	44	58	152	7	55.8571	8.03418	33	57	78	4	58	7.53326	45	55	71	2	108	26.8701	70	108	146
Mx2	57	0	.	.	.	.	.	9	133.778	28.3744	54.5	132	178	4	53.25	4.37857	47.5	50	59	2	34.5	7.42462	24	34.5	45	0	.	.	.	.	.	6	68.1667	11.6295	44	65	95	4	136.25	71.9552	47	60	225.5	0	.	.	.	.	.
Gna13	55	2	45	15.5563	23	45	67	6	67.8333	11.4028	50	69.5	92	5	68.4	25.9809	14.5	55	71	4	42.25	14.3891	15.5	35	69	2	41	3.53553	36	41	46	2	84	25.4558	48	84	120	4	61	5.11126	53.5	64.5	68.5	1	239	.	239	239	239
Pstpip1	55	1	80	.	80	80	80	6	117.333	18.9966	68	133.5	151	3	70.6667	20.4523	31	64	117	0	.	.	.	.	.	6	42.1667	9.29581	25	32	51	3	76	10.8423	53	76	99	3	70.3333	4.7219	59	74	78	1	39	.	39	39	39
Ncoa7	54	1	13	.	13	13	13	5	94	16.6949	53	98	112	3	62.3333	19.7672	14	84	89	5	76.4	20.3776	25.5	86	96	4	56	11.7951	32.5	55.5	79.5	4	34	11.4237	17	26	51	4	86.5	44.7011	26	42	147	1	114	.	114	114	114
Trim34a	49	1	49	.	49	49	49	9	51.3333	8.34887	27.5	49	61	6	59.6667	11.8314	37	51.5	79	2	41.5	8.13173	30	41.5	53	5	63	9.9559	42.5	51	67	1	14	.	14	14	14	0	.	.	.	.	.	0	.	.	.	.	.
Cd274	47	0	.	.	.	.	.	9	94.1111	19.4869	44	63	108	3	102.667	32.9118	47	80	181	6	66.5	10.7671	44	53.5	93	6	41.6667	5.70412	41	43.5	52	2	48	5.65685	40	48	56	0	.	.	.	.	.	0	.	.	.	.	.
Ch25h	46	1	70	.	70	70	70	21	50.5238	5.40329	32	41	57.5	7	68.7143	16.7731	38	46	93	3	55.6667	4.76873	44	61	62	0	.	.	.	.	.	3	34	8.99383	22	24	56	0	.	.	.	.	.	0	.	.	.	.	.
Syvn1	43	3	78.6667	9.24161	58	81	97	8	89.5	15.504	50.5	89.5	136	4	82.25	31.1456	44	48.5	120.5	1	49	.	49	49	49	9	52.2222	9.8241	22	55	58	3	59.3333	8.91108	38	66	74	0	.	.	.	.	.	1	35	.	35	35	35
Enc1	42	6	58.8333	12.0702	33	54	89	10	78.1	13.4636	43	74.5	93	6	55.6667	8.34555	32	63	75	3	56	22.1058	13	49	106	0	.	.	.	.	.	0	.	.	.	.	.	0	.	.	.	.	.	2	81	19.799	53	81	109
Irf2	42	3	34.3333	16.6021	14	14	75	8	42.5	10.4028	13	34	72.5	3	104.667	25.2645	43	131	140	3	74	35.5653	12	52	158	0	.	.	.	.	.	2	35.5	16.617	12	35.5	59	2	12.5	0.353553	12	12.5	13	1	65	.	65	65	65
Csrnp1	41	4	91.25	36.8296	31	68.5	151.5	18	133.111	16.3552	81	114.5	209	3	77.6667	12.9643	50	78	105	2	53	5.65685	45	53	61	0	.	.	.	.	.	0	.	.	.	.	.	0	.	.	.	.	.	0	.	.	.	.	.
Cbx4	41	0	.	.	.	.	.	7	45.8571	8.80962	25	38	76	6	88.5	27.3392	23	80.5	113	5	100.2	22.1728	50	101	109.5	1	40	.	40	40	40	0	.	.	.	.	.	0	.	.	.	.	.	1	58	.	58	58	58
Gm12250	41	0	.	.	.	.	.	7	101.286	28.7002	39	46	210	3	79	2.35702	74	79	84	6	50.5	8.0614	36	44.5	62	5	84	18.8955	58.5	64	67.5	1	63	.	63	63	63	1	48	.	48	48	48	0	.	.	.	.	.
Zfp36	38	5	47.4	5.08803	36	45	50.5	17	81.1765	8.90987	45.5	77	107	4	45.25	6.87727	36.5	38	54	0	.	.	.	.	.	0	.	.	.	.	.	0	.	.	.	.	.	0	.	.	.	.	.	4	86.75	37.806	27	55	146.5
Ccrl2	19	0	.	.	.	.	.	5	52	8.78635	31.5	54	57	4	52.75	11.7067	36.5	62.5	69	1	78	.	78	78	78	1	77	.	77	77	77	0	.	.	.	.	.	1	18	.	18	18	18	0	.	.	.	.	.
[truncated: 36 more columns]
