# Supplementary material for: Single molecule poly(A) tail-seq shows LARP4 opposes deadenylation throughout mRNA lifespan with most impact on short tails
Source: eLife. 2020 Aug 3;9:e59186. doi: 10.7554/eLife.59186 (PMC7413741; doi:10.7554/eLife.59186)
Supplement: Supplementary file 5. [file elife-59186-supp5.xlsx]

## Sheet: Sheet1
Supp Table ST4. Primers and oligos used for generating fragments containing full-length polyA tail with adjoining 3'UTRs.
Primer/oligo name	Sequence 5' > 3'	Notes
3’Linker	/5Phos/CTCTGCGTTGATACCACTGCTTGCGGCCGCATTA	Annealed to 3'LinkerSplint. This oligo contains a NotI restriction site that was not used in this protocol.
3’LinkerSplint	/5BiotinTEG/TAATGCGGCCGCAAGCAGTGGTATCAACGCAGAGTTTTT	Annealed to 3'Linker. This oligo contains a NotI restriction site and an attached biotin that were not used in this protocol.
2soRH	GCCTGAGCTCTGCAGAGATCNNNNNN	Used for second strand synthesis. This oligo contains a Mbo1 restriction site that was not used in this protocol.
2soRH-PCR	GCCTGAGCTCTGCAGAGATC	Identical to 2soRH extension; used as forward primer for amplification.
3’Linker-PCR	AAGCAGTGGTATCAACGCAGA	Complementary to 3'Linker; used as reverse primer for amplification.
